# Supplementary material for: Palladium-catalysed reactions in water using catalysts covalently tethered on a thermo-responsive polymer
Source: Royal Society of Chemistry journal article supplement (doi:10.1039/d4cy01108b), 2024-12-06
Supplement: d4cy01108b1.pdf [file d4cy01108b1.pdf]

## Supplementary Materials for

### Palladium-Catalyzed Reactions in Water Using Pd-catalysts Covalently Tethered on Thermo-responsive Polymer

Noriyuki Suzuki<sup>1,\*</sup>, Nozomu Ebara<sup>1</sup>, Rikito Arai<sup>1</sup>, Chirika Takahashi<sup>1</sup>, Tsai-Yu Hung<sup>2</sup>, Yuko Takeoka<sup>1</sup>, Masahiro Rikukawa<sup>1</sup>, Yukie Yokota<sup>1</sup>, Fu-Yu Tsai<sup>2,\*</sup>

|                                                                                                                                                               |    |
|---------------------------------------------------------------------------------------------------------------------------------------------------------------|----|
| <b>1. Materials and Methods</b> .....                                                                                                                         | 3  |
| <b>2. Preparative methods for the compounds</b> .....                                                                                                         | 4  |
| 2-1. 1-(Azidomethyl)-4-(chloromethyl)benzene <sup>9</sup> .....                                                                                               | 4  |
| 2-2. <i>S</i> -(4-(Azidomethyl)benzyl) <i>O</i> -ethyl carbonodithioate ( <b>4</b> ). <sup>10</sup> .....                                                     | 6  |
| 2-3. Preparation of the RAFT agent bearing <i>N,N</i> -ligand <b>2</b> . .....                                                                                | 8  |
| 2-4. Preparation of the homopolymer PNIPAAm bearing pyridyl triazole end <b>2-N'</b> .....                                                                    | 10 |
| 2-5. Preparation of <b>2-N</b> : Removal of the xanthogenate terminus of <b>2-N'</b> <sup>11</sup> .....                                                      | 12 |
| 2-5. Preparation of ligand-tethered diblock copolymer <b>2-NS</b> .....                                                                                       | 13 |
| 2-6. Preparation of polymer-immobilized Pd-complex <b>Pd-2-N</b> . .....                                                                                      | 14 |
| 2-7. Preparation of <b>5</b> . <sup>12</sup> .....                                                                                                            | 15 |
| 2-8. Preparation of small molecule Pd complex <b>Pd-5</b> . <sup>12</sup> .....                                                                               | 16 |
| 2-9. Preparation of 2-phenyl-1,10-phenanthroline. <sup>13, 14</sup> .....                                                                                     | 17 |
| 2-10. Preparation of 1-bromo-4-[2-[(1,1-dimethylethyl)dimethylsilyl]ethynyl]benzene ( <b>S12</b> ). <sup>15</sup> .....                                       | 18 |
| 2-11. Preparation of 2-(4-(( <i>tert</i> -butyldimethylsilyl)ethynyl)phenyl)-9-phenyl-1,10-phenanthroline ( <b>S13</b> ). ..                                  | 20 |
| 2-12. Deprotection of TBS group from <b>S13</b> : Preparation of <b>11</b> .....                                                                              | 21 |
| 2-13. RAFT agent with NNC-pincer ligand <b>3</b> . .....                                                                                                      | 22 |
| 2-14. Polymerization of <i>N</i> -isopropylacrylamide using <b>3</b> as a RAFT agent. .....                                                                   | 25 |
| 2-15. Preparation of <b>3-N</b> : Removal of xanthogenate terminus of <b>3-N'</b> .....                                                                       | 27 |
| 2-16. Preparation of polymer-immobilized Pd-complex <b>Pd-3-N</b> .....                                                                                       | 29 |
| <b>3. Catalytic reactions using thermo-responsive Pd catalysts in water</b> .....                                                                             | 31 |
| 3-1. Mizoroki-Heck reactions in water using <b>Pd-2-N</b> .....                                                                                               | 31 |
| 3-2. Suzuki-Miyaura cross coupling reactions in water using <b>Pd-2-N</b> . .....                                                                             | 33 |
| 3-3. Mizoroki-Heck reactions in water using the copolymers using <b>Pd-3-N</b> in the <i>presence</i> of <b>NS</b> , and reuse of the catalyst solution. .... | 34 |
| 3-4. Mizoroki-Heck reactions in water using the copolymers using <b>Pd-3-N</b> in the <i>absence</i> of <b>NS</b> .....                                       | 36 |
| 3-5. Reuse of the aqueous solution of <b>Pd-3-N</b> , with no surfactants in 10 times scale. ....                                                             | 37 |
| 3-6. STEM analysis of the aqueous solution of the catalyst.....                                                                                               | 38 |
| 3-6-1. Mizoroki-Heck reaction.....                                                                                                                            | 38 |
| 3-6-2. Suzuki-Miyaura reaction.....                                                                                                                           | 40 |
| <b>4. Spectroscopic data for the catalytic reactions in water</b> .....                                                                                       | 41 |
| 4.1. Mizoroki-Heck reactions in water. ....                                                                                                                   | 41 |

|                                                                                                     |    |
|-----------------------------------------------------------------------------------------------------|----|
| Butyl ( <i>E</i> )-3-phenylacrylate ( <b>8aa</b> ) <sup>17</sup> .....                              | 41 |
| Butyl ( <i>E</i> )-3-(4-acetylphenyl)acrylate ( <b>8ba</b> ) <sup>17</sup> .....                    | 42 |
| Butyl ( <i>E</i> )-3-(4-methoxyphenyl)acrylate ( <b>8ca</b> ) <sup>17</sup> .....                   | 43 |
| Butyl ( <i>E</i> )-3-(4-methylphenyl)acrylate ( <b>8ea</b> ) <sup>17</sup> .....                    | 44 |
| Butyl ( <i>E</i> )-3-(2-methylphenyl)acrylate ( <b>8ia</b> ) <sup>1</sup> .....                     | 45 |
| <i>n</i> -Butyl ( <i>E</i> )-3-(4-trifluoromethylphenyl)acrylate ( <b>8ga</b> ) <sup>17</sup> ..... | 46 |
| <i>n</i> -Butyl ( <i>E</i> )-3-(4-nitrophenyl)acrylate ( <b>8pa</b> ) <sup>17</sup> .....           | 47 |
| <i>n</i> -Butyl ( <i>E</i> )-3-(1-naphthyl)acrylate ( <b>8qa</b> ) <sup>1</sup> .....               | 48 |
| <i>tert</i> -Butyl ( <i>E</i> )-3-phenylacrylate ( <b>8ac</b> ) <sup>1</sup> .....                  | 49 |
| <i>N</i> -Isopropyl ( <i>E</i> )-3-phenylacrylamide ( <b>8ad</b> ) <sup>17</sup> .....              | 50 |
| ( <i>E</i> )-Stilbene ( <b>8ab</b> ) <sup>17</sup> .....                                            | 51 |
| 4.2. Suzuki-Miyaura cross coupling reactions in water .....                                         | 52 |
| 4-Methoxybiphenyl ( <b>10ab</b> ) <sup>18, 19</sup> .....                                           | 52 |
| 4-Methoxybiphenyl ( <b>10ac</b> ) <sup>18, 19</sup> .....                                           | 53 |
| 4-Methylsulfanylbiphenyl ( <b>10ad</b> ) <sup>19</sup> .....                                        | 54 |
| 4-Acetylbiphenyl ( <b>10ae</b> ) <sup>18, 20</sup> .....                                            | 55 |
| 4-Chlorobiphenyl ( <b>10af</b> ) <sup>19</sup> .....                                                | 57 |
| 3-Methoxybiphenyl ( <b>10ag</b> ) <sup>21</sup> .....                                               | 58 |
| 4-Hydroxybiphenyl ( <b>10da</b> ) <sup>22</sup> .....                                               | 59 |
| 4-Aminobiphenyl ( <b>10da</b> ) <sup>22</sup> .....                                                 | 60 |
| (4-trifluoromethyl)biphenyl ( <b>10ga</b> ) <sup>23</sup> .....                                     | 61 |
| 4-fluorobiphenyl ( <b>10ha</b> ) <sup>19</sup> .....                                                | 62 |
| 2-methylbiphenyl ( <b>10ia</b> ) <sup>19</sup> .....                                                | 63 |
| 2-Methoxybiphenyl ( <b>10ja</b> ) <sup>21</sup> .....                                               | 64 |
| 2-Phenylpyridine ( <b>10ka</b> ) <sup>18, 19</sup> .....                                            | 65 |
| 2-Phenylnaphthalene ( <b>10la</b> ) <sup>19</sup> .....                                             | 66 |
| Ethyl 4-phenylbenzoate ( <b>10ma</b> ) <sup>21</sup> .....                                          | 67 |
| <b>5. References</b> .....                                                                          | 68 |

## 1. Materials and Methods

The preparation of RAFT agents and polymers were conducted under an argon atmosphere by using standard Schlenk techniques, unless otherwise mentioned. *N*-Isopropyl acrylamide (NIPAAm) was purchased from Kanto Chemical Co., Inc. and recrystallized from hexane/toluene prior to use. Bis(chloromethyl)benzene, (*tert*-butyldimethylsilyl)acetylene, sodium azide, potassium ethyl xanthogenate, 2-ethynyl pyridine, copper(I) bromide, *N,N,N',N'',N'''*-pentamethyldiethylenetriamine (PMDETA), tris[(1-benzyl-1*H*-1,2,3-triazol-4-yl)methyl]amine (TBTA), sodium *p*-styrene sulfonate, bis(acetonitrile)dichloropalladium, dichloro(1,5-cyclooctadiene)palladium, tetrabutylammonium fluoride (1.0 M in tetrahydrofuran) were purchased from Tokyo Chemical Industry Co., Ltd. and used as received. 2,2'-Azobis(isobutyronitrile) (AIBN), dimethylacetamide (DMA) were purchased from Kanto Chemical Co., Inc. and used without further purification. 4,4'-Azobis(4-cyanovaleric acid) (V-501) was purchased from FUJIFILM Wako Pure Chemical Corporation. 1-Bromo-4-iodobenzene was purchased from Sigma-Aldrich Co. LLC. and used without further purification. The diblock copolymer **NS** was prepared as previously reported.<sup>1-8</sup> Dialysis was performed using Spectra/Por® RC tubing (MWCO: 1.0 kD, 3.5kD). Deionized water was obtained on WE-200 (Yamato Scientific Co., Ltd.). NMR spectra were recorded on JEOL ECA 500 and Bruker Avance III HD400 spectrometers. Gel permeation chromatography (GPC) was measured on PU-4580 and RI-4030 system (JASCO Corporation) equipped with Shodex GPC KD-802 and KD-803 columns (Showa Denko K.K.) using *N,N*-dimethylformamide (DMF) (0.1 wt% LiBr) as eluent; the molecular weight of the polymers was determined based on monodispersed poly(ethylene oxide) as standard, and <sup>1</sup>H NMR spectroscopy as well. Scanning transmission electron microscopy (STEM) was recorded on HITACHI Cs-corrected STEM HD-2700 with accelerating voltage of 200 kV, EDX on AMETEK EDAX Octane T Ultra W with 100 mm<sup>2</sup> SDD (Hitachi High-Tech Corporation) measured by CLEARIZE Co. Ltd. and JEM-ARM200F Thermal FE (STEM SDD) at The University of Tokyo.

## 2. Preparative methods for the compounds

### 2-1. 1-(Azidomethyl)-4-(chloromethyl)benzene <sup>9</sup>

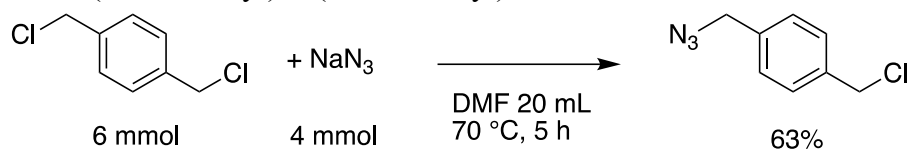

In a thoroughly dried Schlenk tube filled with argon, sodium azide (260 mg, 4.0 mmol), 1,4-bis(chloromethyl)benzene (1.05 g, 6.0 mmol) was dissolved in DMF (20 mL), and the mixture was stirred at 70 °C for 5 h. The mixture was filtered through Celite™ and the volatile was removed in vacuo from the filtrate, and the residue was extracted dissolved in diethyl ether. The solution was washed with water and the organic layer was dried over magnesium sulfate. The desiccant was filtered off, and the filtrate was concentrated. The residue was purified by column chromatography on silica gel (chloroform/hexane = 1/9) to afford the title compound as colorless oil (460 mg, 63%).

<sup>1</sup>H NMR (CDCl<sub>3</sub>, Me<sub>4</sub>Si, 500 MHz): δ = 4.34 (s, 2H, CH<sub>2</sub>), 4.59 (s, 2H, CH<sub>2</sub>), 7.31 (d, *J* = 10 Hz, 2H), 7.41 (d, *J* = 10 Hz, 2H).

<sup>13</sup>C{<sup>1</sup>H} NMR (CDCl<sub>3</sub>, Me<sub>4</sub>Si, 125 MHz): δ = 31.6, 40.2 (CH<sub>2</sub>), 114.4, 114.9, 121.5 (q), 123.5 (q).

### <sup>1</sup>H NMR

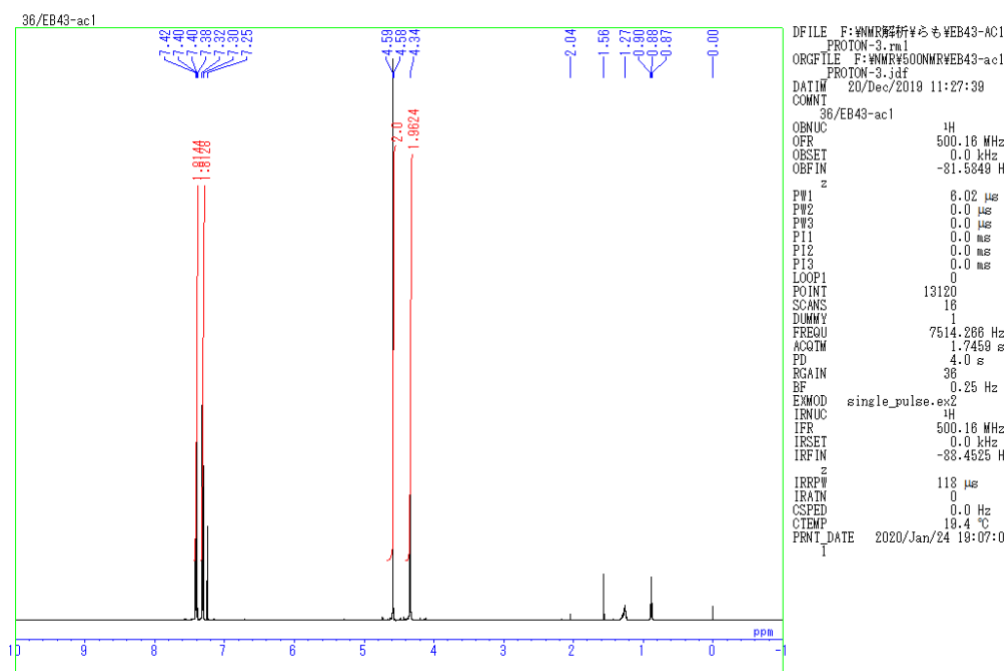



# $^{13}\text{C}\{^1\text{H}\}$ NMR

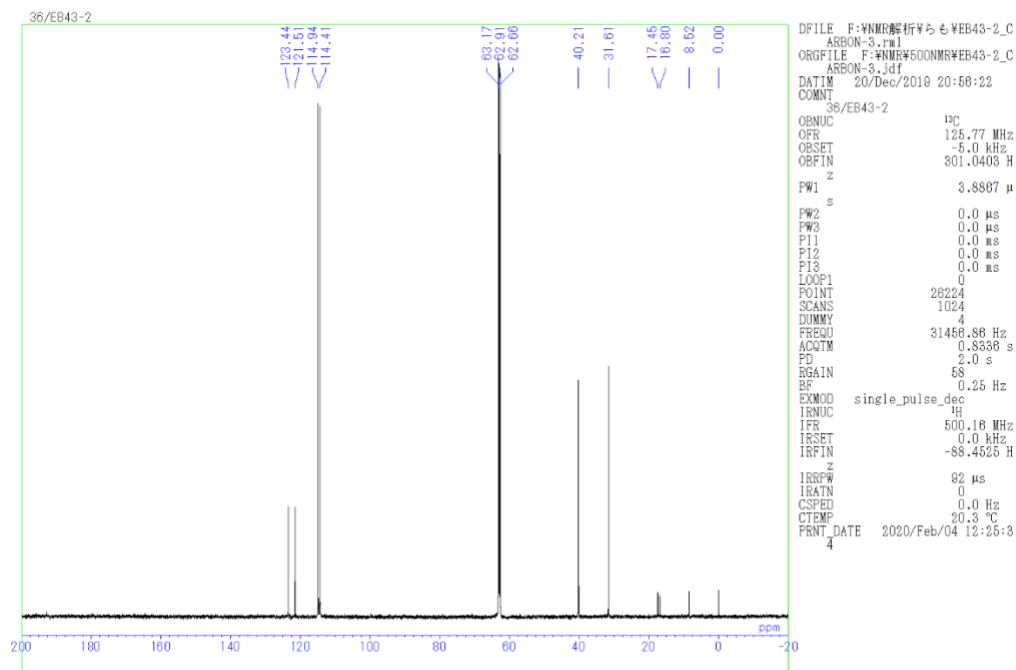

# DEPT135

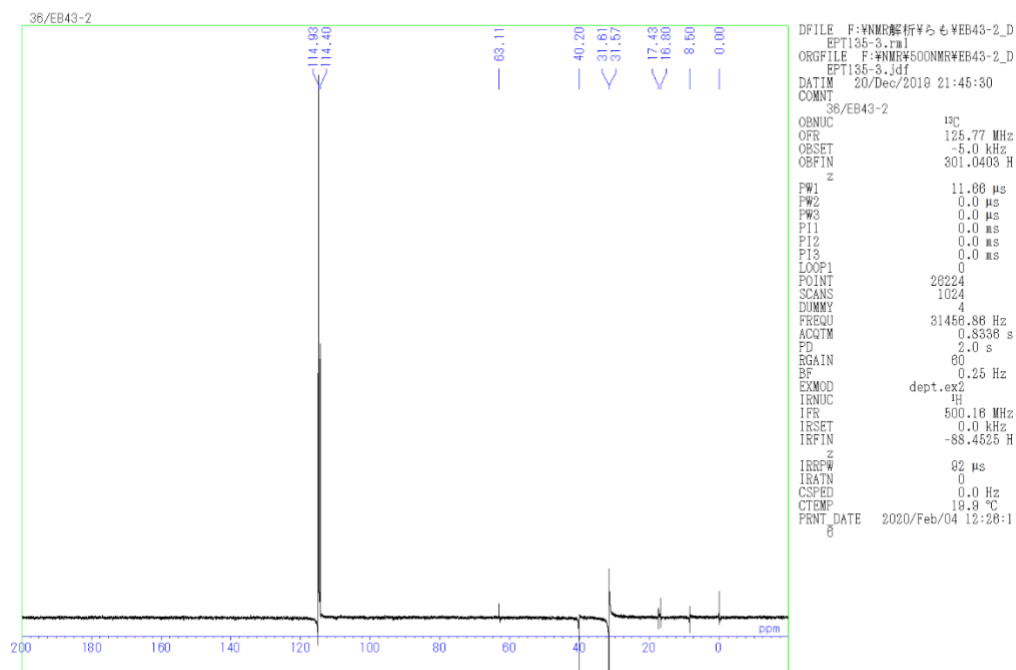

2-2. *S*-(4-(Azidomethyl)benzyl) *O*-ethyl carbonodithioate (**4**).<sup>10</sup>

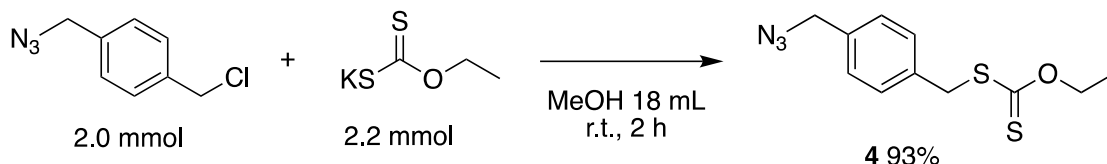

A 100 mL Schlenk tube was dried and filled with argon. In this tube, 1-(azidomethyl)-4-(chloromethyl)benzene (0.361 g, 2.0 mmol) in MeOH (9 mL) and potassium ethyl xanthogenate (0.358 g, 2.2 mmol) in MeOH (9 mL) were added and the mixture was stirred at r.t. for 2 h. To the reaction mixture was added water and extracted with diethyl ether (50 mL  $\times$  3). The organic layer was washed twice with water and dried over magnesium sulfate. The desiccant was filtered off and the volatile was removed in vacuo from the filtrate. The residue was purified with column chromatograph on silica gel (CHCl<sub>3</sub>/hexane = 1/3) to give **4** as colorless oil (0.499 g, 93%).

<sup>1</sup>H NMR (CDCl<sub>3</sub>, Me<sub>4</sub>Si, 500 MHz):  $\delta$  = 1.42 (t,  $J$  = 7 Hz, 3H, CH<sub>3</sub>), 4.32 (s, 2H, CH<sub>2</sub>), 4.37 (s, 2H, CH<sub>2</sub>), 4.65 (qt,  $J$  = 7 Hz, 2H, OCH<sub>2</sub>), 7.27 (d,  $J$  = 10 Hz, 2H), 7.37 (d,  $J$  = 10 Hz, 2H).

<sup>13</sup>C{<sup>1</sup>H} NMR (CDCl<sub>3</sub>, Me<sub>4</sub>Si, 100 MHz):  $\delta$  = 13.8 (CH<sub>3</sub>), 40.0, 54.5, 70.2 (CH<sub>2</sub>), 128.5, 129.6, (CH), 134.9 (q), 136.1 (q), 213.8 (q).

<sup>1</sup>H NMR

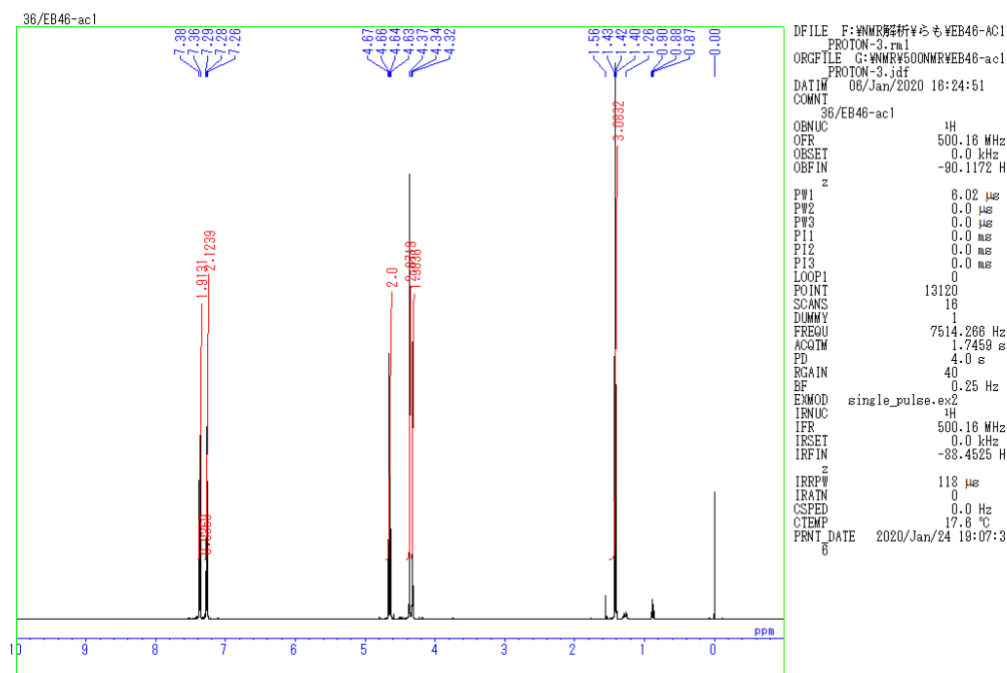

# $^{13}\text{C}\{^1\text{H}\}$ NMR

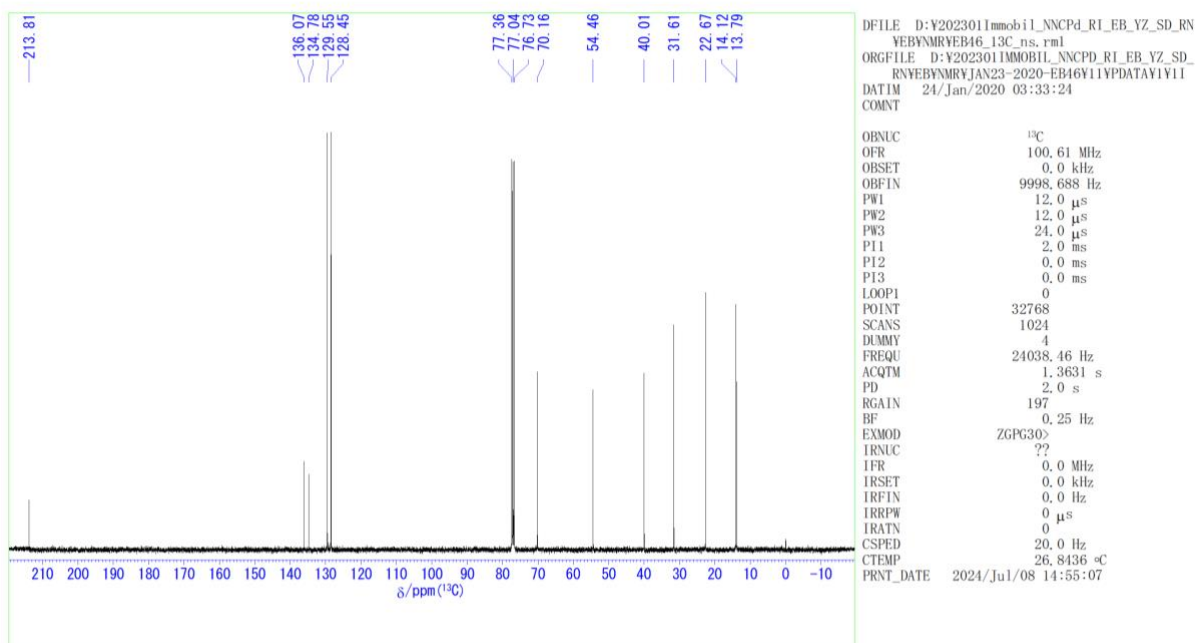

# DEPT 135

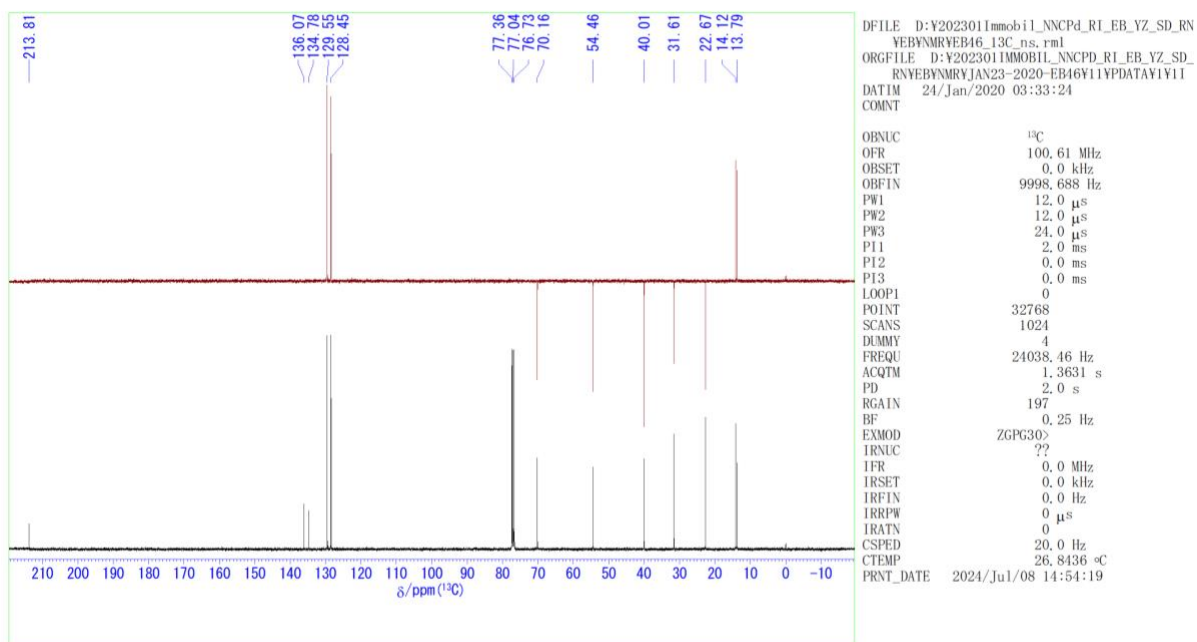

### 2-3. Preparation of the RAFT agent bearing *N,N*-ligand **2**.

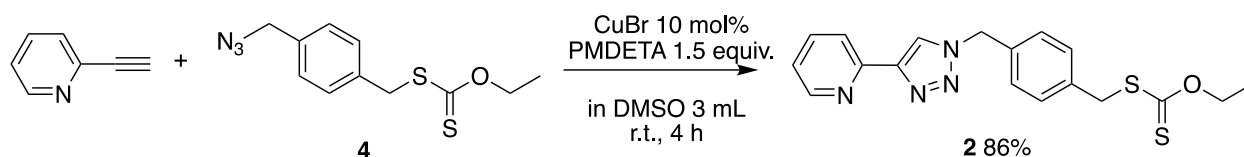

A Schlenk tube was dried, and the azide **4** (381 mg, 1.43 mmol), 2-ethynyl pyridine (147 mg, 1.43 mmol), copper(I) bromide (21 mg, 0.143 mmol), PMDETA (372 mg, 2.15 mmol) were dissolved in DMSO (5.8 mL), and the solution was stirred at r.t. for 4 h. The reaction mixture was extracted twice with ethyl acetate and water, and the organic layer was dried over magnesium sulfate. The desiccant was filtered off, and the filtrate was concentrated in vacuo to leave reddish solid. The residual solid was purified by column chromatograph on silica gel (chloroform/hexane = 1/1) to afford the title compound as light-yellow solid (458 mg, 86%).

$^1\text{H}$  NMR ( $\text{CDCl}_3$ ,  $\text{Me}_4\text{Si}$ , 500 MHz):  $\delta$  = 1.41 (t,  $J$  = 7 Hz, 3H,  $\text{CH}_3$ ), 4.36 (s, 2H,  $\text{SCH}_2$ ), 4.65 (qt,  $J$  = 7 Hz, 2H,  $\text{OCH}_2$ ), 5.56 (s, 2H,  $\text{NCH}_2$ ), 7.20–7.23 (m, 1H), 7.28 (d,  $J$  = 8 Hz, 2H), 7.37 (d,  $J$  = 8 Hz, 2H), 7.77 (td,  $J$  = 8, 1 Hz, 1H), 8.04 (s, 1H), 8.17 (d,  $J$  = 8 Hz, 1H), 8.54 (d,  $J$  = 5 Hz, 1H).

$^{13}\text{C}\{^1\text{H}\}$  NMR ( $\text{CDCl}_3$ ,  $\text{Me}_4\text{Si}$ , 125.8 MHz):  $\delta$  = 13.8 ( $\text{CH}_3$ ), 39.8, 54.0, 70.2 ( $\text{CH}_2$ ), 120.3, 121.9, 122.9, 128.6, 129.9, 133.7 (q), 136.9 (q), 137.0, 149.4, 150.2 (q), 213.7 (q).

High resolution MS (ESI): calcd. for  $\text{C}_{18}\text{H}_{18}\text{N}_4\text{OS}_2$  ( $\text{M} + \text{Na}$ ) = 393.0820, found = 393.0809.

#### $^1\text{H}$ NMR

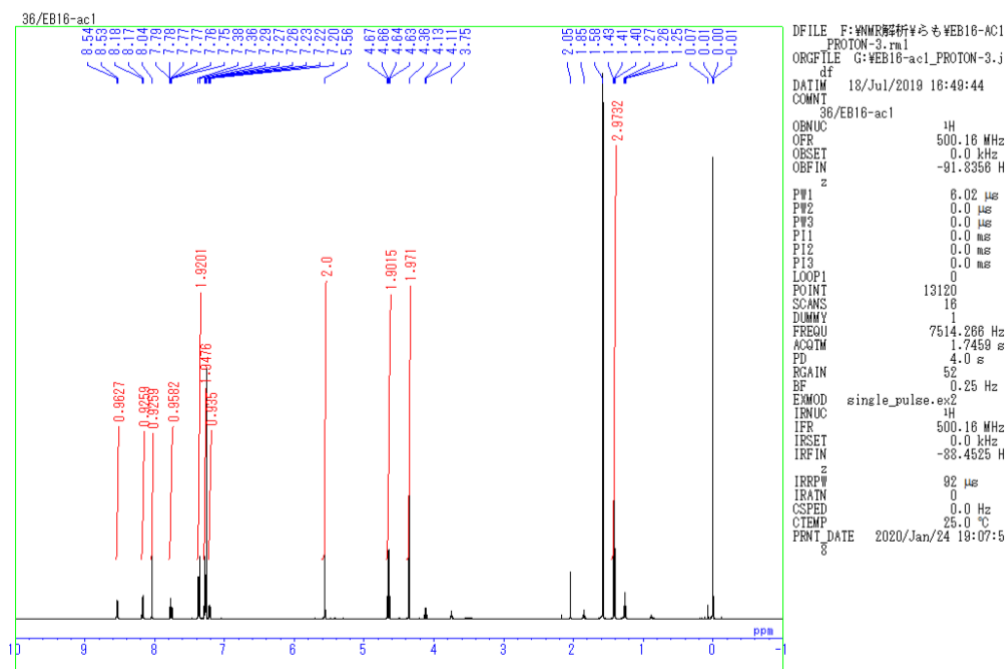

# $^{13}\text{C}\{^1\text{H}\}$ NMR

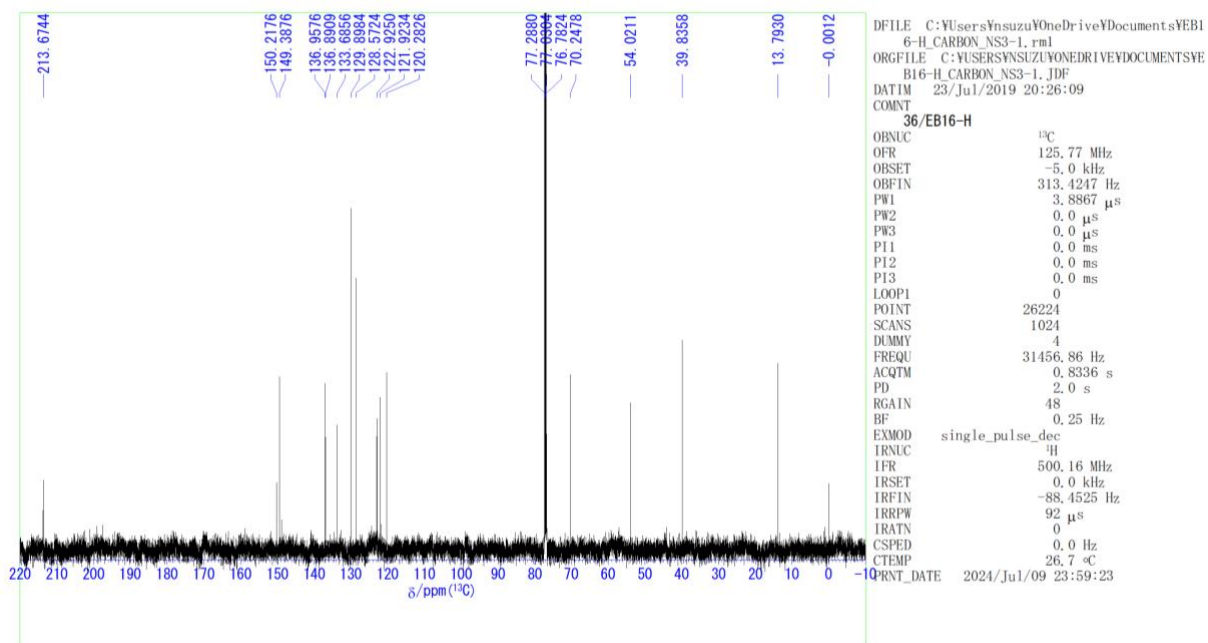

# DEPT135

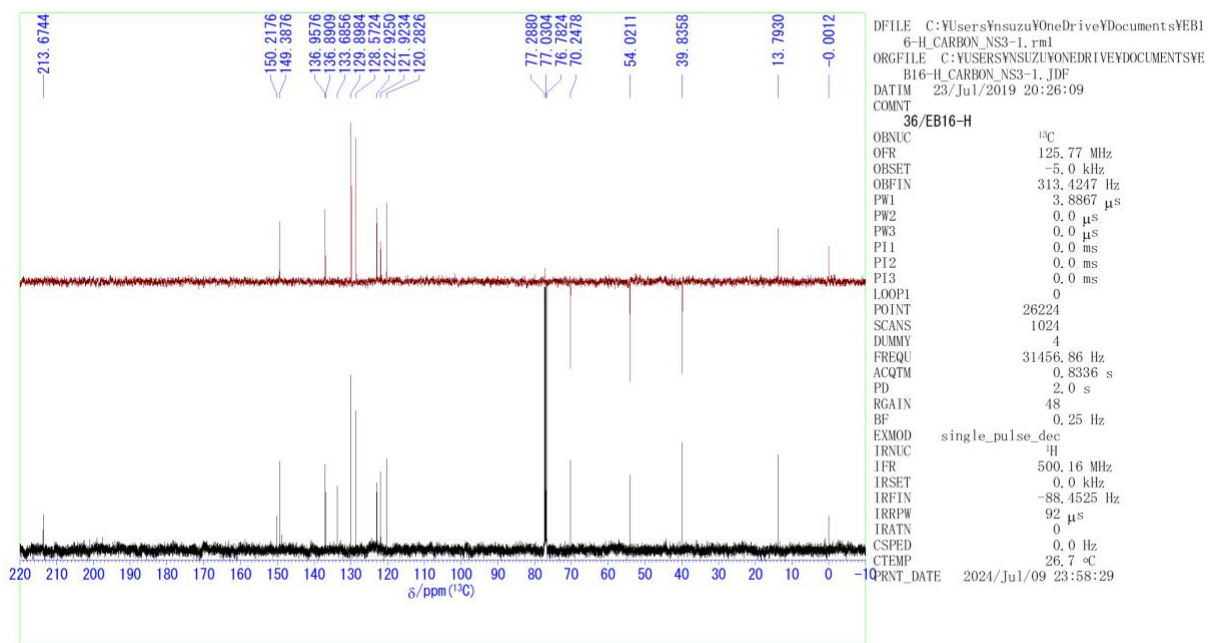

## 2-4. Preparation of the homopolymer PNIPAAm bearing pyridyl triazole end **2-N'**

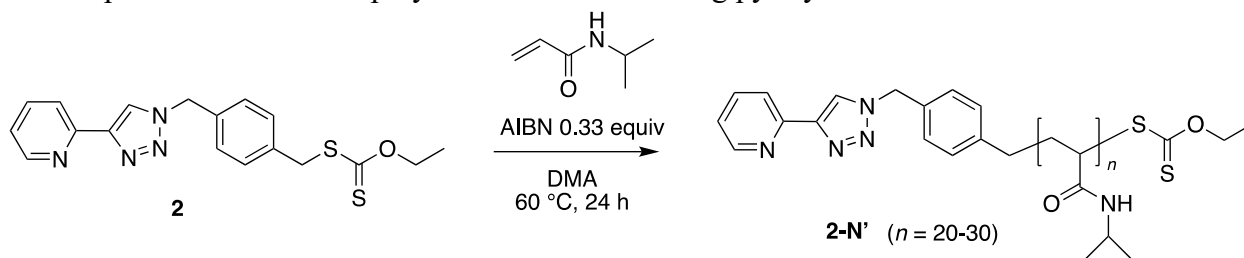

Typical procedure for polymerization of *N*-isopropylacrylamide (NIPAAm) using **2** as a RAFT agent is as follows. A thoroughly dried Schlenk tube (25 mL) was filled with argon. In this vessel, RAFT agent **2** (100 mg, 0.270 mmol), NIPAAm (0.611 g, 5.4 mmol), 2,2'-azobis(isobutyronitrile) (AIBN) (15 mg, 0.09 mmol) were dissolved in dimethylacetamide (DMA) (5 mL) and degassed in three freeze-pump-thaw cycles. The solution was stirred at 60 °C for 24 h, and the mixture was poured into hexane/diethyl ether (300/100 mL). Yellow precipitate was dried in vacuo to afford the title compound as pale yellow solid (752 mg, quant.). The polymer was characterized by  $^1\text{H}$  NMR spectroscopy to determine polymerization degree (PD = 21,  $M_n = 2,745$ ). GPC  $M_n = 2,578$ ,  $M_w = 2,948$ ,  $M_w/M_n = 1.14$  (based on PEG standard).

$^1\text{H}$  NMR ( $\text{CDCl}_3$ ,  $\text{Me}_4\text{Si}$ , 500 MHz):  $\delta = 4.01$  (br, NH), 5.63 (s, 2H,  $\text{NCH}_2\text{Ar}$ ), 7.77 (s, 1H), 8.03 (s, 1H), 8.16 (s, 1H), 8.53 (s, 1H).

### $^1\text{H}$ NMR

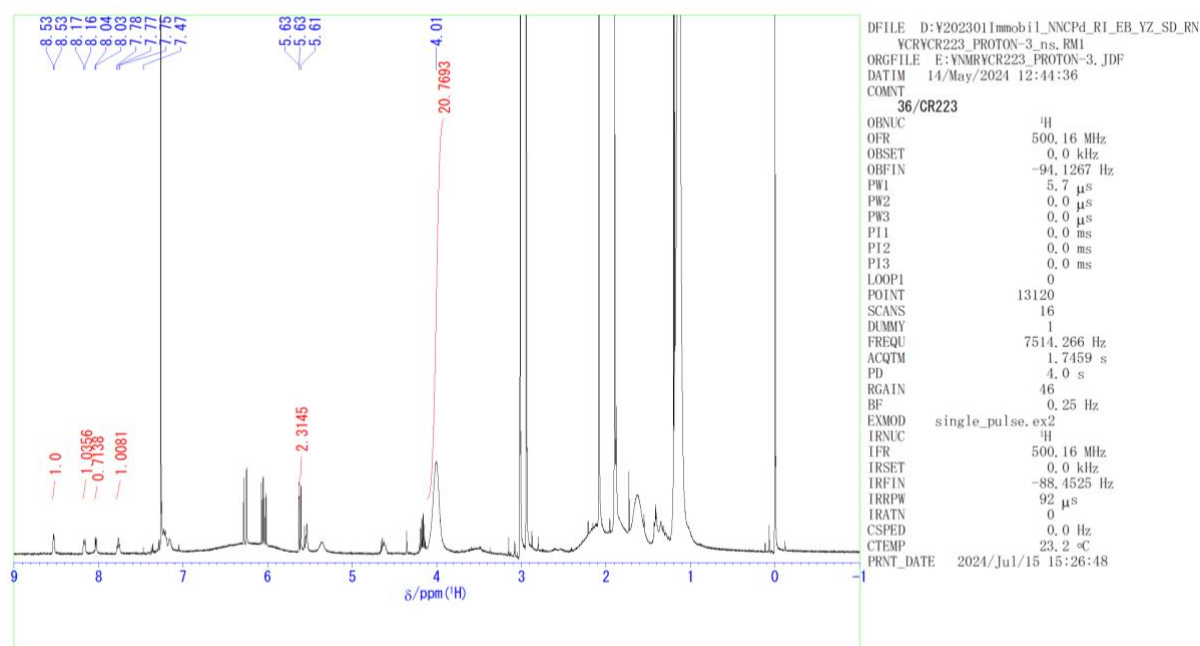

GPC chromatogram of 2-N' (n = 21).

20240628\_0628 CR223\_007 2024/07/01 14:55:22

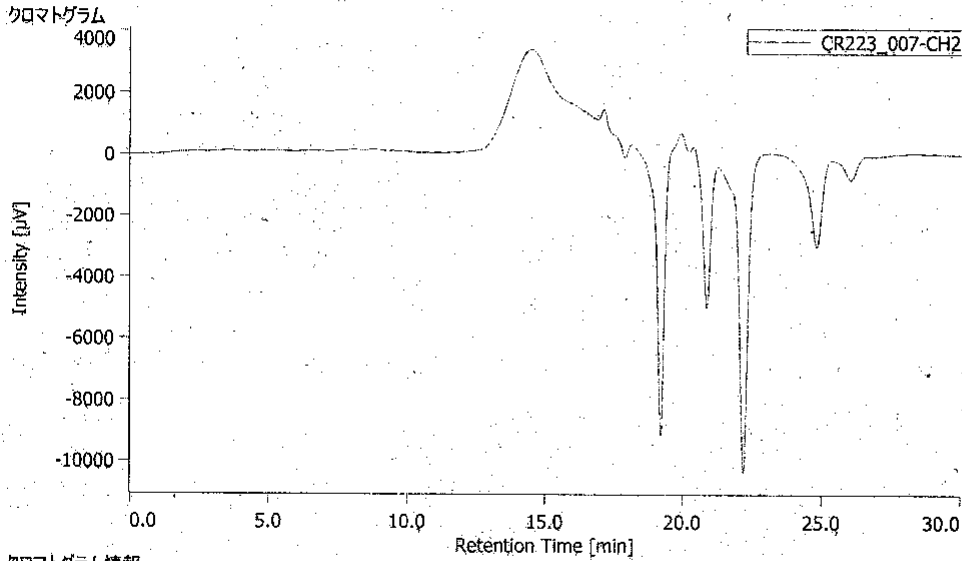

クロマトグラム情報

ユーザー名  
更新日時  
コメント  
HPLC システム名  
測定日  
注入量  
サンプル#  
プロジェクト名  
取込時間  
測定シーケンス  
コントロールメソッド  
ピークIDテーブル  
検量線テーブル  
追加情報  
カラム情報  
クロマトグラムラベル  
測定済みシーケンス  
クロマトグラム名  
サンプル名  
分子量分布曲線  
分子量分布曲線 全区間

Administrator  
2024/07/01 13:40:51  
ChromNAV Lite  
2024/07/01 13:10:51  
10.0 [μL]  
-  
KY  
30.0 [min]

20240628\_0628 2024/06/28 17:06:09  
CR223\_007  
CR

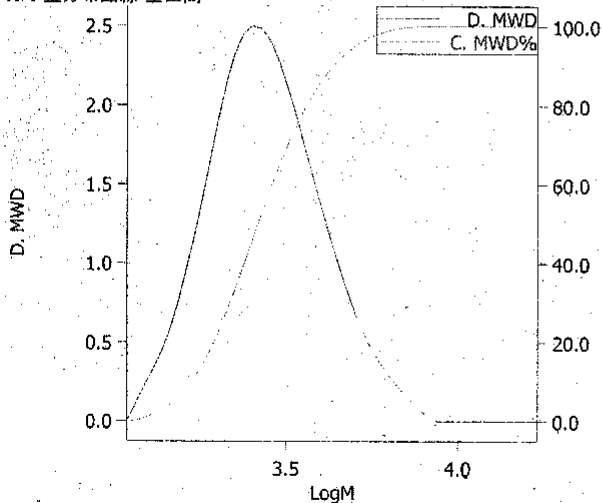

分子量計算結果

<ファイル情報>

ファイル名 20240701  
ユーザー名 Administrator  
更新日時 2024/07/01 14:54:15  
コメント

<分子量計算結果(全区間)>

| # | 区間範囲 | Mn | Mw   | Mz   | Mw/Mn | Mz/Mn |        |
|---|------|----|------|------|-------|-------|--------|
| 1 | 全区間  | 2  | 2578 | 2948 | 3395  | 2948  | 1.1433 |

| # | Mn     | Mw     | 区間値 | 百分率 | 報告 | 分子量 |
|---|--------|--------|-----|-----|----|-----|
| 1 | 1.1518 | 223752 |     |     |    | CR  |

% MWD%

<分子量計算結果(区間別)>

| # | 区間範囲              | Mn | Mw      | Mz      | Mw/Mn   | Mz/Mn |
|---|-------------------|----|---------|---------|---------|-------|
| 1 | 12.3000 - 16.1200 | 2  | 12.3000 | 16.1200 | 14.4583 | 2665  |

| # | Mn   | Mw   | Mz   | Mw/Mn | Mz/Mn  | 区間値    |        |
|---|------|------|------|-------|--------|--------|--------|
| 1 | 2578 | 2948 | 3395 | 2948  | 1.1433 | 1.1518 | 223752 |

| # | 百分率    | 報告 | 分子量 | 分子量 |
|---|--------|----|-----|-----|
| 1 | 100.00 |    | CR  |     |

## 2-5. Preparation of **2-N**: Removal of the xanthogenate terminus of **2-N'** <sup>11</sup>

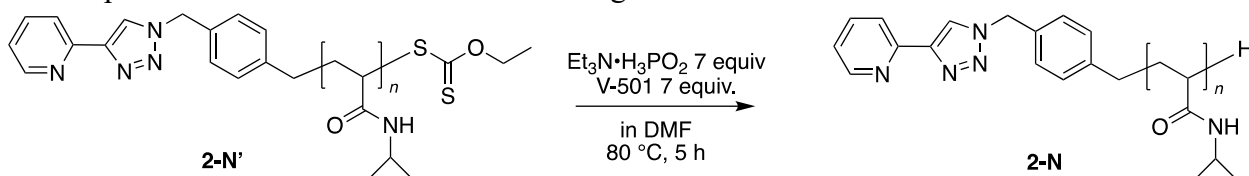

Typically, in a dried Schlenk tube, the polymer **2-N'** (710 mg 0.259 mmol), triethylammonium hypophosphite (376 mg, 1.82 mmol), V-501 (510 mg, 1.82 mmol) were dissolved in DMSO (14 mL). The mixture was degassed by three cycle of freeze-pump-thaw. The mixture was stirred at 80°C for 5 h. Yellowish solution was dialyzed (MWCO = 1.0 kD), and the solution was dried in vacuo to give **2-N** white-yellow solid (422 mg,  $n = 21$ , 62%). Elemental analysis showed that the amount of sulfur element in **2-N** was less than detection limit.

$^1\text{H}$  NMR ( $\text{CDCl}_3$ ,  $\text{Me}_4\text{Si}$ , 500 MHz):  $\delta = 3.99$  (br, *NH*), 5.54 (s, 2H,  $\text{NCH}_2\text{Ar}$ ), 7.77 (s, 1H), 8.05 (s, 1H), 8.17 (s, 1H), 8.54 (s, 1H).

$^1\text{H}$  NMR ( $n = 32$ )

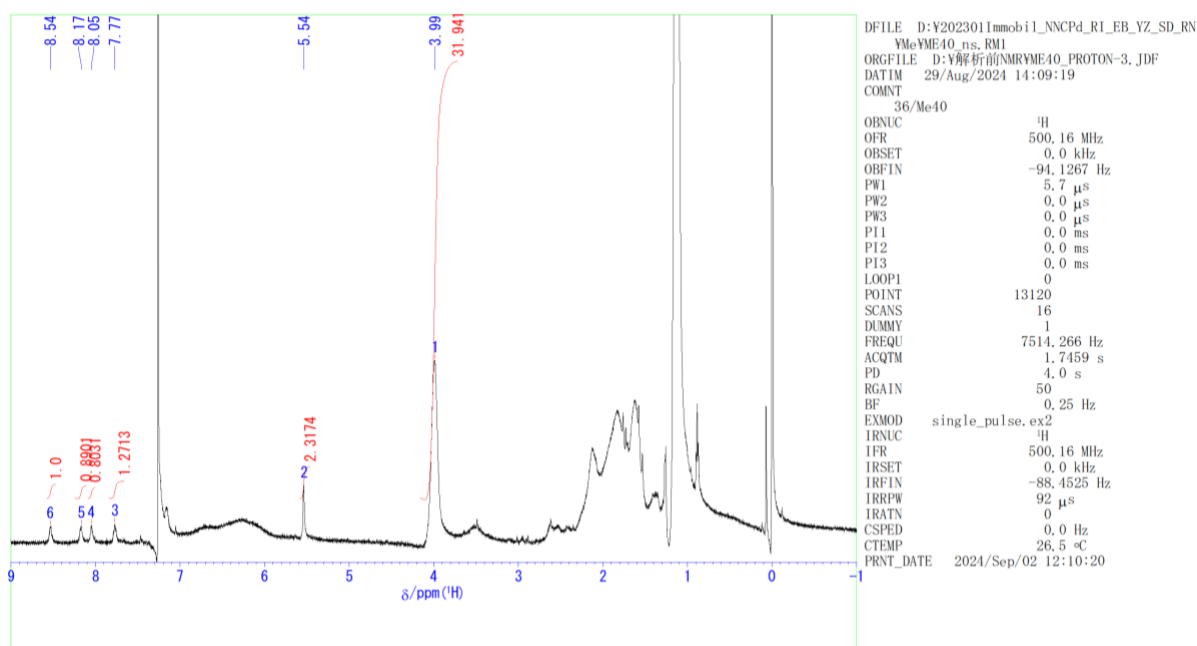



## 2-5. Preparation of ligand-tethered diblock copolymer **2-NS**.

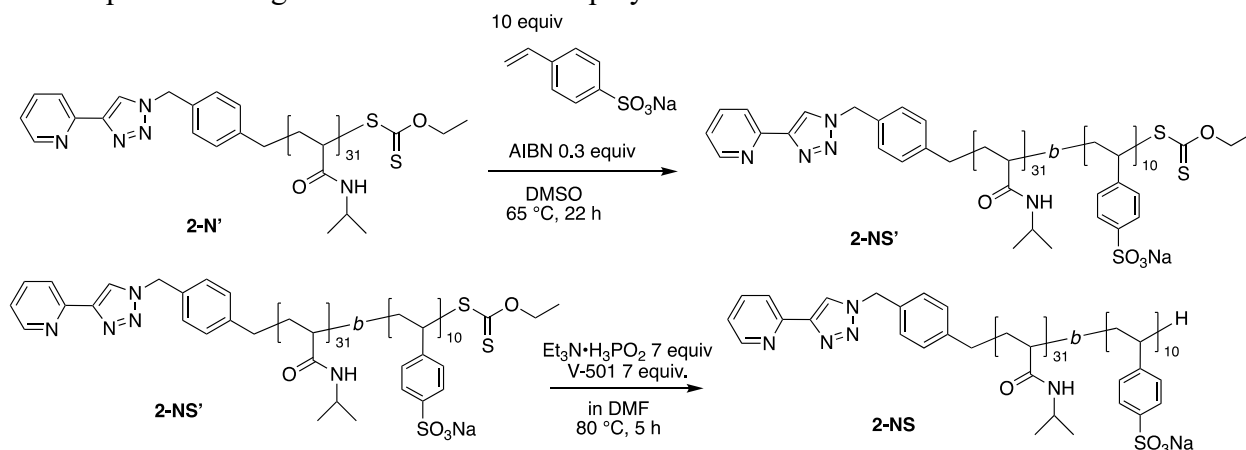

In a dried Schlenk tube filled with argon, the polymer **2-N'** PNIPAAm (200 mg, 0.0516 mmol), sodium p-styrene sulfonate (106 mg, 0.516 mmol), AIBN (14.1 mg, 0.0086 mmol) were dissolved in DMSO (5 mL) and the solution was degassed by freeze-pump-thaw for three times. The solution was stirred at 65 °C for 22 h. Yellow solution was dialyzed (MWCO = 3.5 kD) in water. The mixture was dried in vacuo to give yellowish solid (245 mg, 80%). The polymer **2-NS'** was identified by <sup>1</sup>H NMR and polymerization degree was determined ( $M_n = 5,900$ ).

NMR (D<sub>2</sub>O, Me<sub>3</sub>Si(CH<sub>2</sub>)<sub>3</sub>SO<sub>3</sub>Na, 500 MHz):  $\delta = 3.89$  (br, CO-NH-CH), 5.65 (s, 2H, N-CH<sub>2</sub>-Ph), 6.08-8.10 (br, Ph), 8.44 (s, 1H), 8.54 (s, 1H).

The xanthogenate terminus was removed in a similar manner to **2-N'** to furnish **2-NS**.

<sup>1</sup>H NMR (D<sub>2</sub>O, Me<sub>3</sub>Si(CH<sub>2</sub>)<sub>3</sub>SO<sub>3</sub>Na, 500 MHz):  $\delta = 3.89$  (br, CO-NH-CH), 5.65 (s, 2H, N-CH<sub>2</sub>-Ph), 6.08-8.10 (br, Ph), 8.44 (s, 1H), 8.54 (s, 1H).

<sup>1</sup>H NMR

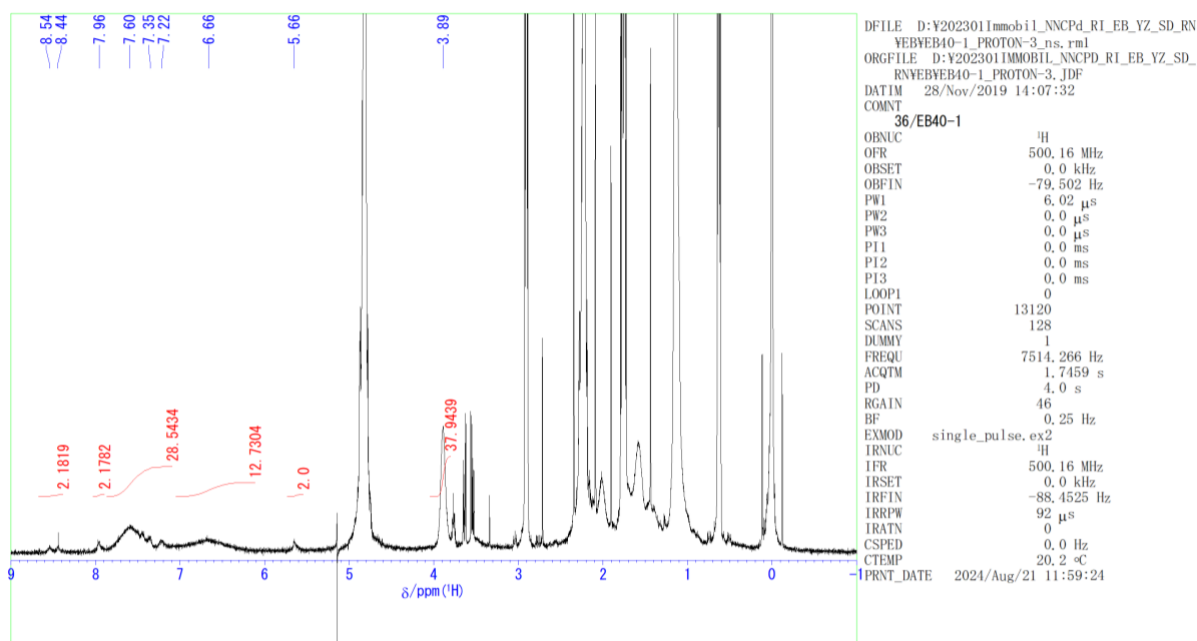

## 2-6. Preparation of polymer-immobilized Pd-complex **Pd-2-N**.

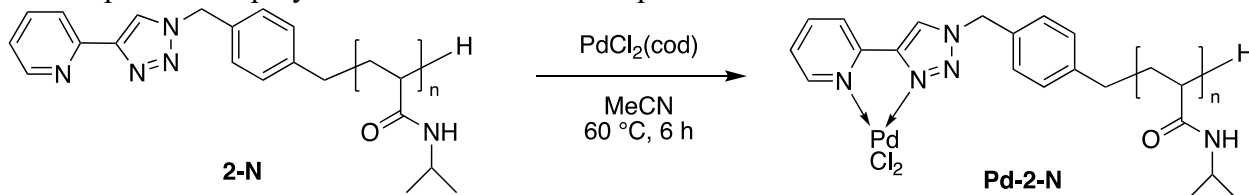

In a dried test tube with a screw cap, the polymer **2-N** ( $n = 21$ , 279 mg, 0.106 mmol),  $\text{PdCl}_2(\text{cod})$  (30 mg, 0.106 mmol) were dissolved in acetonitrile (9 mL) and the mixture was stirred at 60 °C for 6 h. The yellow clear solution turned to reddish, and the mixture was poured into hexane/diethyl ether (4/1) to precipitate polymer. Solid was filtered and dried in vacuo to leave dark brown solid (299 mg). The product was identified by  $^1\text{H}$  NMR and ICP analysis. ICP analysis showed 3.9 wt% of Pd content, which is consistent with the calculated value (3.8 wt% Pd).

$^1\text{H}$  NMR ( $\text{D}_2\text{O}$ ,  $\text{Me}_3\text{Si}(\text{CH}_2)_3\text{SO}_3\text{Na}$ , 500 MHz):  $\delta = 3.89$  (br, NH), 5.91 (s, 2H,  $\text{NCH}_2\text{Ar}$ ), 6.14–8.27 (br, Ar), 9.00 (s, 1H), 9.47 (s, 1H).

$^1\text{H}$  NMR

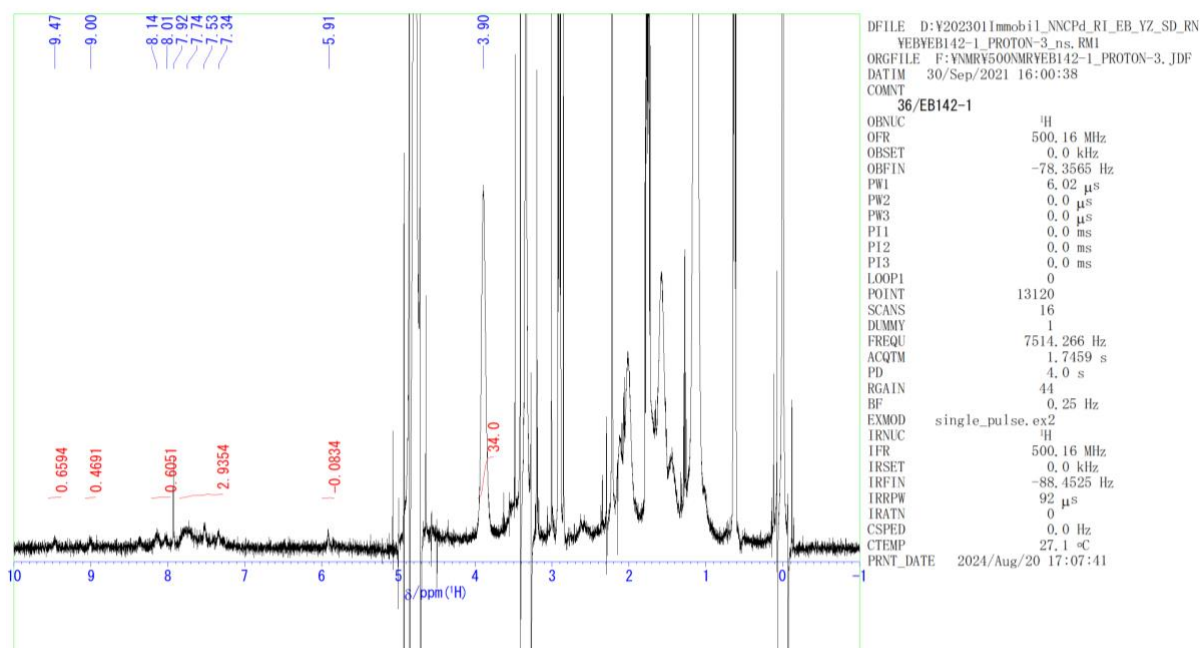

## 2-7. Preparation of **5**.<sup>12</sup>

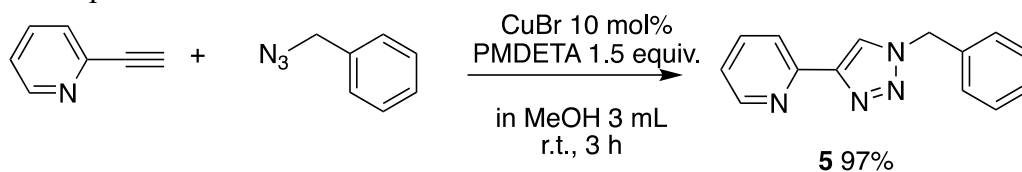

In a dried Schlenk tube filled with argon, and benzyl azide (133 mg, 1.0 mmol) and 2-ethynylpyridine (103 mg, 1.0 mmol), copper(I) bromide (14.3 mg, 0.1 mmol) and PMDETA (260 mg, 1.5 mmol) were dissolved in methanol (3 mL). The mixture was stirred at r.t. for 3 h, and concentrated in vacuo. The residual solid was purified by column chromatograph on silica gel (ethyl acetate/hexane = 1/2) to afford the title compound as white solid (228 mg, 97%).

<sup>1</sup>H NMR (CDCl<sub>3</sub>, Me<sub>4</sub>Si, 500MHz): δ = 5.59 (s, 2H, N-CH<sub>2</sub>-Ph), 7.21 (td, *J* = 5 Hz, 1H, Py), 7.33-7.40 (m, 5H, Ph), 7.77 (td, *J* = 7.5 Hz, 1H, Py), 8.05 (s, 1H, Taz), 8.18 (d, *J* = 10 Hz, 1H, Py), 8.54 (d, *J* = 5 Hz, 1H, Py).

## <sup>1</sup>H NMR

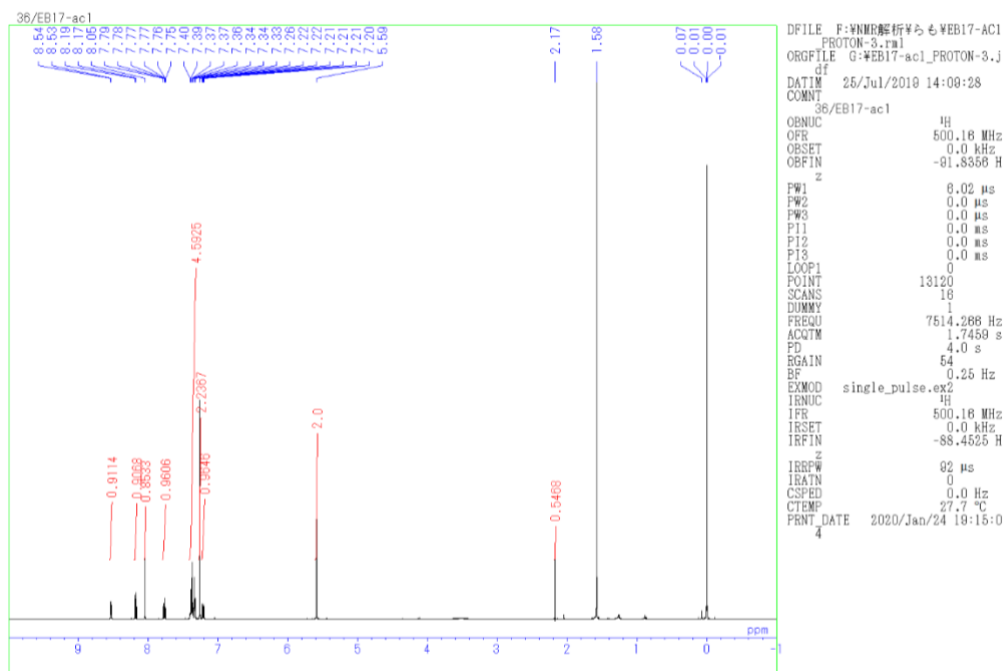

2-8. Preparation of small molecule Pd complex **Pd-5**.<sup>12</sup>

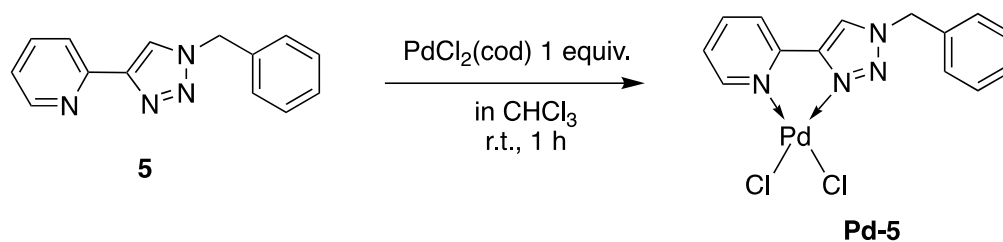

In a dried Schlenk tube, ligand **5** (76 mg, 0.32 mmol) and PdCl<sub>2</sub>(cod) (92 mg, 0.32 mmol) were dissolved in chloroform (20 mL) and the mixture was stirred at r.t. for 1 h. Yellow suspension was filtered, and the collected solid was washed with hexane. The solid was dissolved in DMF to recover and the solvent was removed in vacuo to give dark orange solid (68 mg, 82%).

<sup>1</sup>H NMR (DMSO-*d*<sub>6</sub>, Me<sub>4</sub>Si, 500 MHz): δ = 5.85 (s, 2H, CH<sub>2</sub>), 7.36–7.49 (m, 5H), 7.70 (t, *J* = 6.5 Hz, 1H), 8.20 (d, *J* = 7.5 Hz, 1H), 8.30 (t, *J* = 8.3 Hz, 1H), 8.99 (d, *J* = 5.6 Hz, 1H), 9.21 (s, 1H).

<sup>1</sup>H NMR

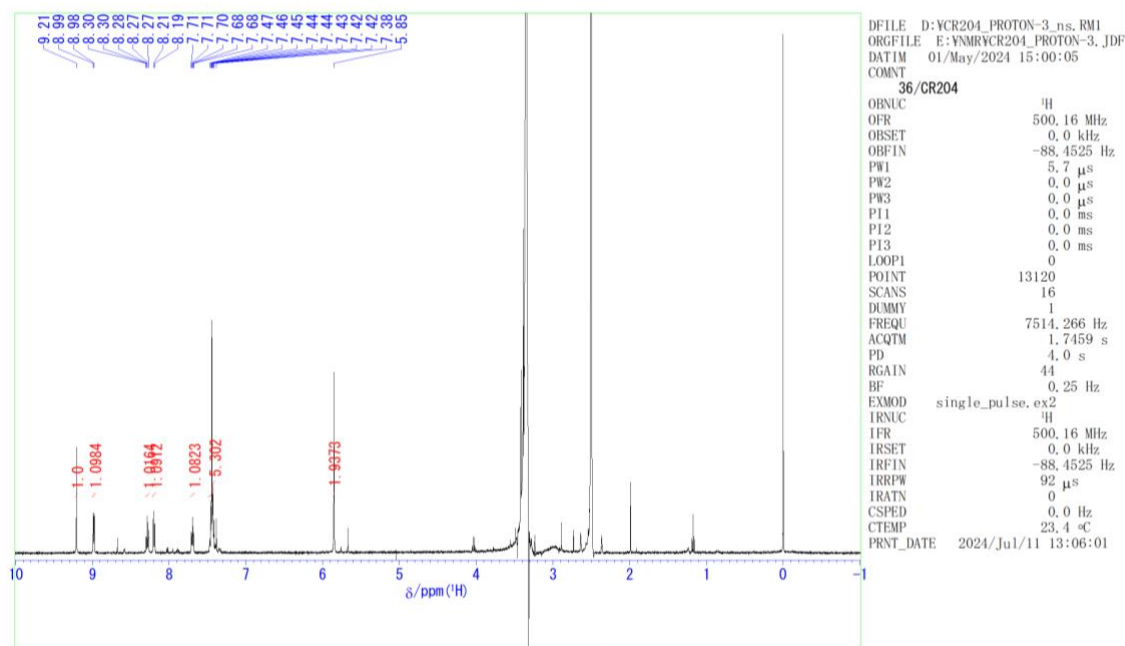

## 2-9. Preparation of 2-phenyl-1,10-phenanthroline.<sup>13, 14</sup>

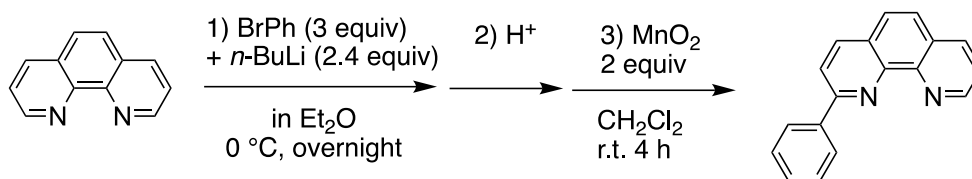

A Schlenk tube was thoroughly dried and filled with argon. In this tube, bromobenzene (942 mg, 6.0 mmol) was dissolved in anhydrous diethyl ether (10 mL) and the solution was cooled at  $-78\text{ }^{\circ}\text{C}$ . To this solution was added *n*-butyllithium (1.6M in *n*-hexane, 3 mL, 4.8 mmol) dropwise and the mixture was allowed to warm to  $0\text{ }^{\circ}\text{C}$  and stirred for 1 h to prepare phenyllithium. Meanwhile, 1,10-phenanthroline (360 mg, 2.0 mmol) was dissolved in anhydrous diethyl ether (7 mL) in a dried Schlenk tube and the solution was cooled at  $-78\text{ }^{\circ}\text{C}$ . To this solution, prepared phenyllithium solution was added dropwise and stirred at  $-78\text{ }^{\circ}\text{C}$  for 3 h. The solution was then warmed up to  $0\text{ }^{\circ}\text{C}$  and stirred for additional 18 h. Aqueous sodium hydroxide (5 wt%, 50 mL) was added to the reaction mixture and extracted with dichloromethane ( $50\text{ mL} \times 3$ ), and combined organic layer was concentrated to ca. 100 mL. in vacuo. Manganese oxide (350 mg, 4.0 mmol) was added to this solution and stirred at r.t. for 4 h. The solution was dried over magnesium sulfate and filtered. The volatiles were removed in vacuo from the filtrate, and the residue was purified by column chromatograph on silica gel (ethyl acetate/hexane = 1/1 to 1/0) to afford the title compound as colorless liquid (365 mg, 71%). Recycling preparative HPLC may be applied for purification.

$^1\text{H NMR}$  ( $\text{CDCl}_3$ ,  $\text{Me}_4\text{Si}$ , 500 MHz):  $\delta = 7.47$  (t,  $J = 7.0$  Hz, 1H), 7.55 (t,  $J = 7.7$  Hz, 2H), 7.64 (dd,  $J = 8.1, 4.6$  Hz, 1H), 7.78 (d,  $J = 9$  Hz, 1H), 7.81 (d,  $J = 9$  Hz, 1H), 8.10 (d,  $J = 8.2$  Hz, 1H), 8.25 (d,  $J = 8$  Hz, 1H), 8.30 (d,  $J = 8$  Hz, 1H), 8.34 (d,  $J = 8$  Hz, 2H), 9.24 (d,  $J = 4.5$  Hz, 1H).

$^1\text{H NMR}$

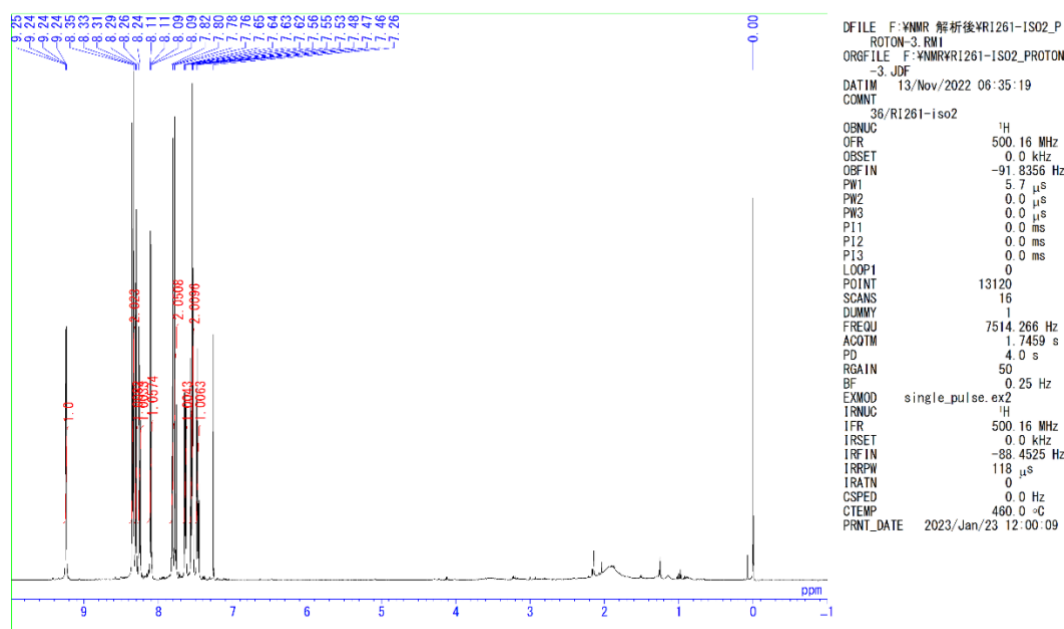

2-10. Preparation of 1-bromo-4-[2-[(1,1-dimethylethyl)dimethylsilyl]ethynyl]benzene (**S12**).<sup>15</sup>

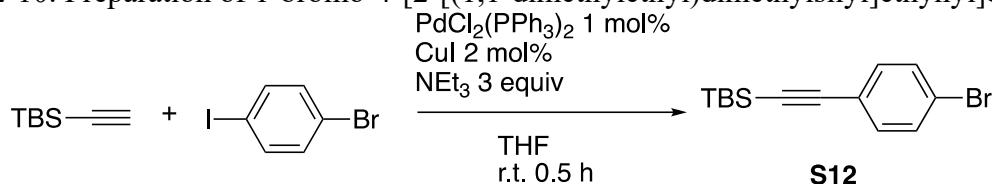

In a dried Schlenk tube, PdCl<sub>2</sub>(PPh<sub>3</sub>)<sub>2</sub> (35 mg, 0.05 mmol), copper(I) iodide (19 mg, 0.1 mmol), triethylamine (1.52 g, 15 mmol) were dissolved in THF (6.7 mL) and the solution was degassed by three freeze-pump-thaw cycles. To this solution, (*tert*-butyldimethylsilyl)acetylene (740 mg, 5.25 mmol) and 1-bromo-4-iodobenzene (1.42 g, 5.0 mmol) was added and stirred at r.t. for 0.5 h. The gray mixture was quenched by sat.NH<sub>4</sub>Cl and extracted by diethyl ether. Combined organic layer was washed with deionized water and brine, and dried over magnesium sulfate. The desiccant was filtered off and the filtrate was concentrated in vacuo. The residue was purified by column chromatography on silica gel (hexane) to afford **S12** as colorless liquid (1.38 g, 94%).

<sup>1</sup>H NMR (CDCl<sub>3</sub>, Me<sub>4</sub>Si, 500 MHz): δ = 0.18 (s, 6H, SiCH<sub>3</sub>), 0.99 (s, 9H, CH<sub>3</sub>), 7.32 (d, *J* = 8.5 Hz, 2H), 7.43 (d, *J* = 8.5 Hz, 2H).

<sup>13</sup>C{<sup>1</sup>H} NMR (CDCl<sub>3</sub>, CHCl<sub>3</sub> = 77.36, Me<sub>4</sub>Si, 100 MHz): δ = -4.3 (CH<sub>3</sub>), 17.0 (q), 26.5 (CH<sub>3</sub>), 94.3 (q), 104.9 (q), 122.5 (q), 123.0 (q), 131.8 (CH), 133.8 (CH).

<sup>1</sup>H NMR

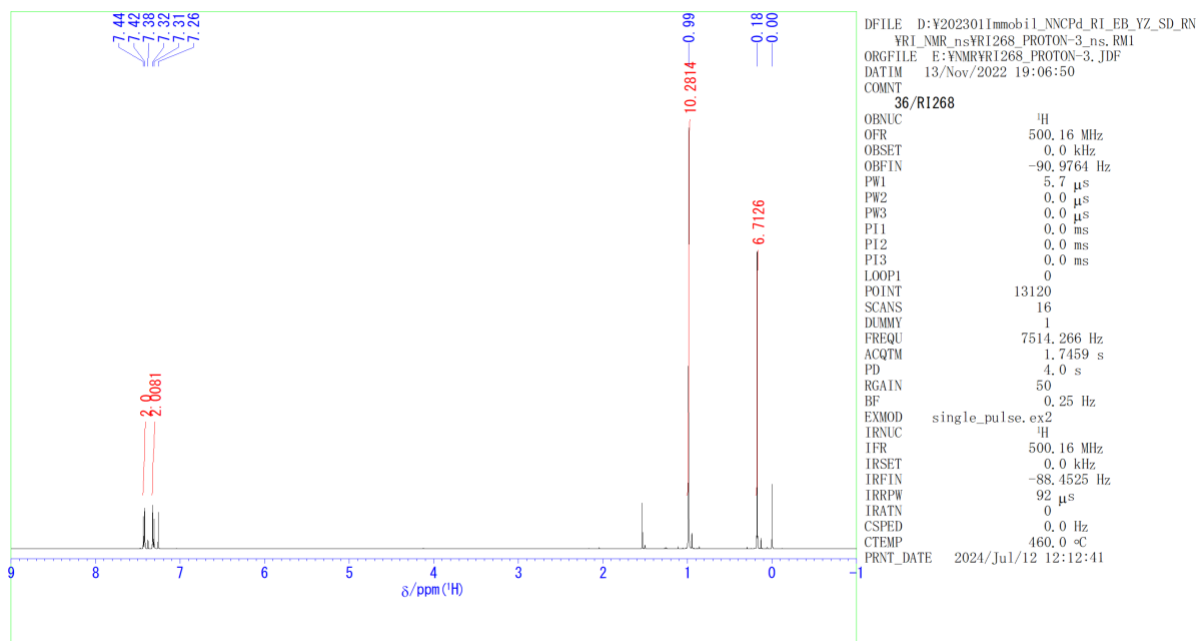

# $^{13}\text{C}\{^1\text{H}\}$ NMR

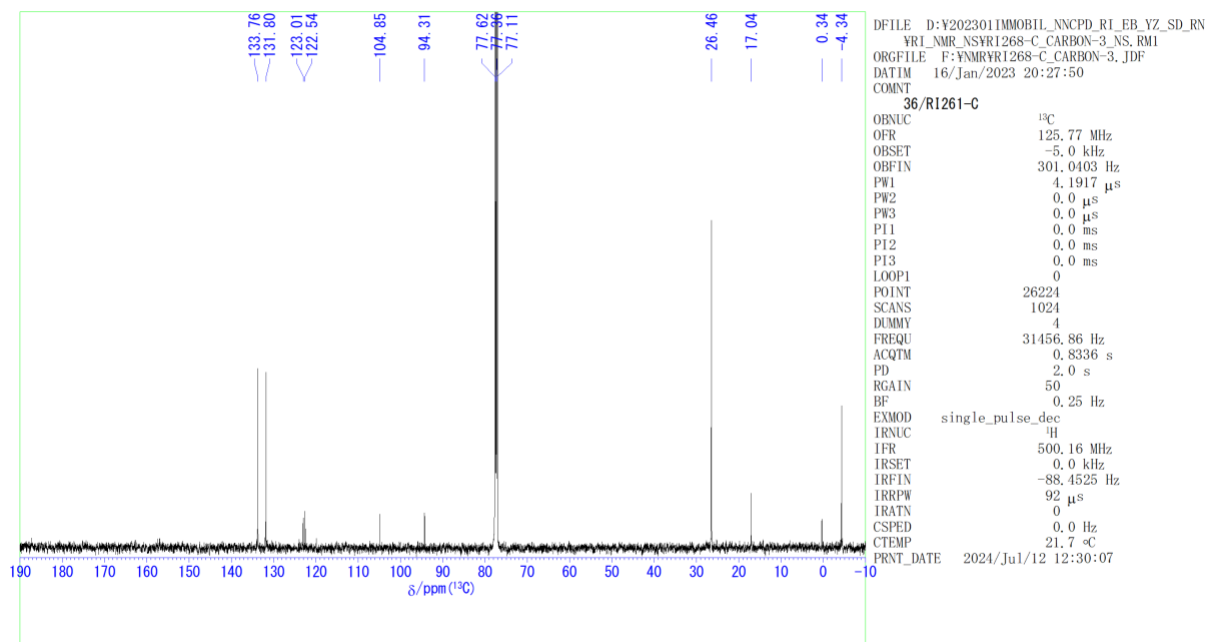

# DEPT

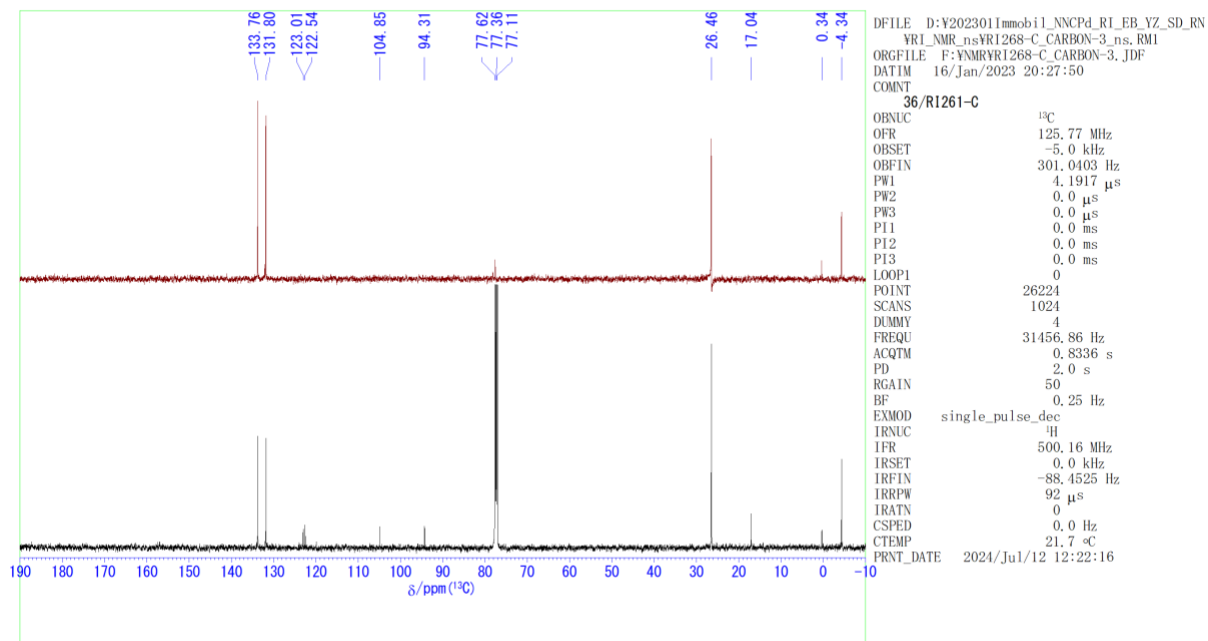

2-11. Preparation of 2-(4-((*tert*-butyldimethylsilyl)ethynyl)phenyl)-9-phenyl-1,10-phenanthroline (**S13**).

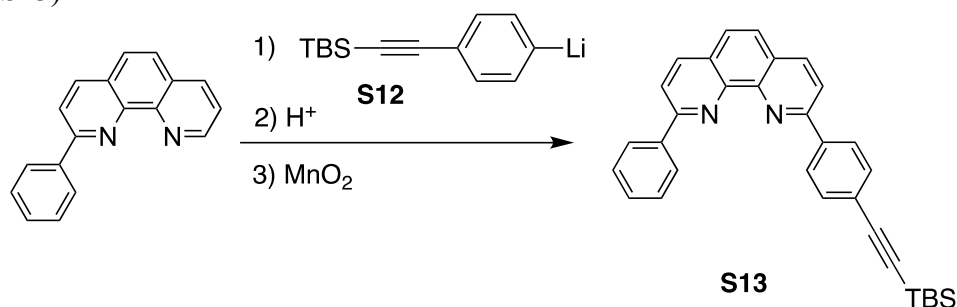

In a dried Schlenk tube, 2-phenyl-1,10-phenanthroline (858 mg, 2.92 mmol) was dissolved in anhydrous diethyl ether (5 mL) and the solution was cooled at  $-78\text{ }^{\circ}\text{C}$ . To this solution, *n*-butyllithium (1.6 M in *n*-hexane, 1.83 mL, 2.92 mmol) was added dropwise and stirred at  $-78\text{ }^{\circ}\text{C}$  for 3 h. The mixture was kept at  $-40\text{ }^{\circ}\text{C}$  and additionally stirred for 16 h to prepare an aryllithium reagent. Meanwhile, **S12** (374 mg, 1.46 mmol) was dissolved in diethyl ether (5.8 mL) in a Schlenk tube and cooled at  $-78\text{ }^{\circ}\text{C}$ . To this solution, the prepared aryllithium was added dropwise at  $-78\text{ }^{\circ}\text{C}$ . The mixture was allowed to warm up to  $0\text{ }^{\circ}\text{C}$  and stirred for 16 h. Aqueous sodium hydroxide (5 wt%, 50 mL) was added to the reaction mixture and extracted with dichloromethane (50 mL  $\times$  3), and combined organic layer was washed once with  $\text{NaOH}_{\text{aq}}$  (10 wt%). The solution was filtered and the filtrate was concentrated to ca. 100 mL. in vacuo. Manganese oxide (250 mg, 2.9 mmol) was added to this solution and stirred at r.t. for 5 h. The solution was dried over magnesium sulfate and filtered. The volatiles were removed in vacuo from the filtrate, and the residue was purified by column chromatograph on silica gel (hexane/ethyl acetate = 9/1) to afford the title compound as colorless liquid (254 mg, 37%). Recycling preparative HPLC may be applied for purification.

$^1\text{H NMR}$  ( $\text{CDCl}_3$ ,  $\text{Me}_4\text{Si}$ , 500 MHz):  $\delta$  = 0.23 (s, 6H,  $\text{Si}(\text{CH}_3)_2$ ), 1.04 (s, 9H,  $\text{Si}-\text{C}(\text{CH}_3)_3$ ), 7.51 (t,  $J$  = 7.1 Hz, 1H), 7.60 (t,  $J$  = 7.5 Hz, 2H), 7.70 (d,  $J$  = 8.5, 2H), 7.79 (d,  $J$  = 8.8 Hz, 1H), 7.81 (d,  $J$  = 8.8 Hz, 1H), 8.15 (d, 8, 1H), 8.16 (d, 8, 1H), 8.32 (dd,  $J$  = 8.6, 2.2 Hz, 2H), 8.43-8.47 (m, 4H).

$^1\text{H NMR}$

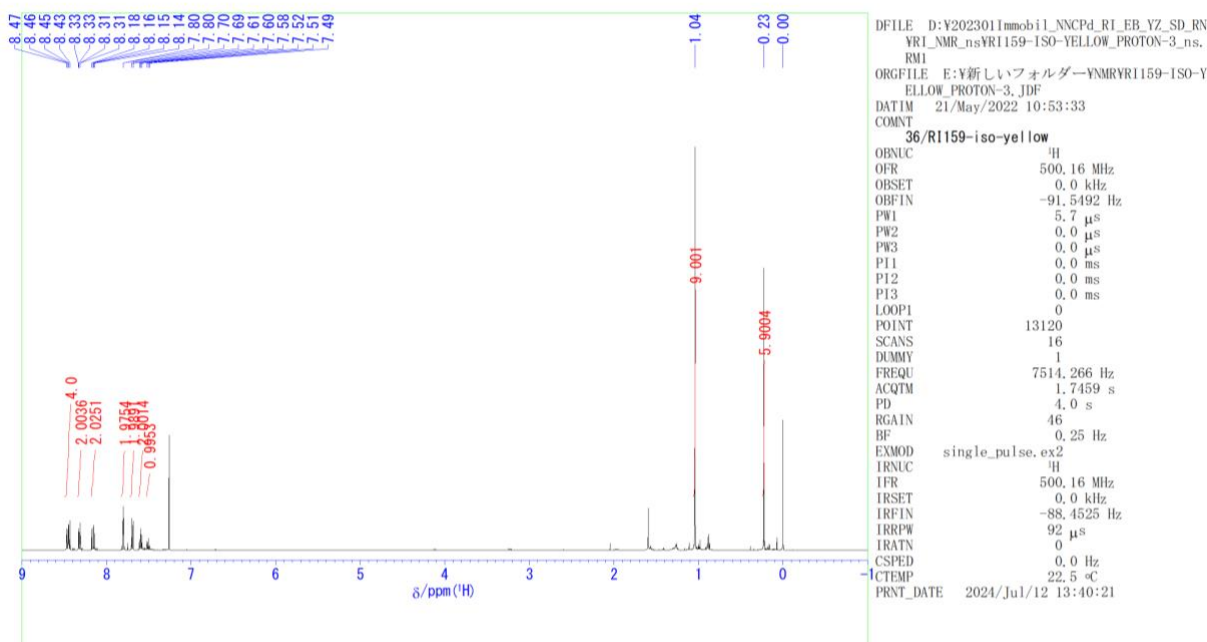



## 2-12. Deprotection of TBS group from **S13**: Preparation of **11**

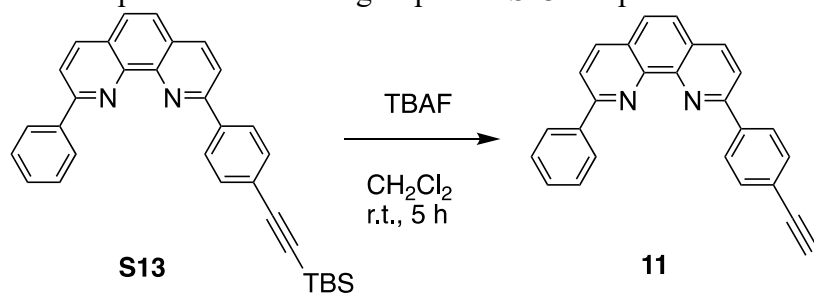

In dichloromethane (5 mL), **S13** (254 mg, 0.540 mmol) and tetrabutylammonium fluoride (1.0 M in tetrahydrofuran, 0.594 mL, 0.594 mmol) were dissolved. The solution was stirred at r.t. for 5 h, and volatiles were removed in vacuo. The residue was purified by column chromatograph on silica gel (hexane/ethyl acetate = 4/1) to furnish **11** as colorless oil (186 mg, 97%).

$^1\text{H NMR}$  ( $\text{CDCl}_3$ ,  $\text{Me}_4\text{Si}$ , 500 MHz):  $\delta$  = 3.21 (s, 1H,  $\text{C}\equiv\text{CH}$ ), 7.51 (t,  $J$  = 7.1 Hz, 1H), 7.60 (t,  $J$  = 7.5 Hz, 2H), 7.72 (d,  $J$  = 8.5, 2H), 7.80 (d,  $J$  = 8.5 Hz, 1H), 7.82 (d,  $J$  = 8.5 Hz, 1H), 8.14-8.18 (m, 2H), 8.33 (dd,  $J$  = 8.6, 2.2 Hz, 2H), 8.44-8.47 (m, 4H).

$^1\text{H NMR}$

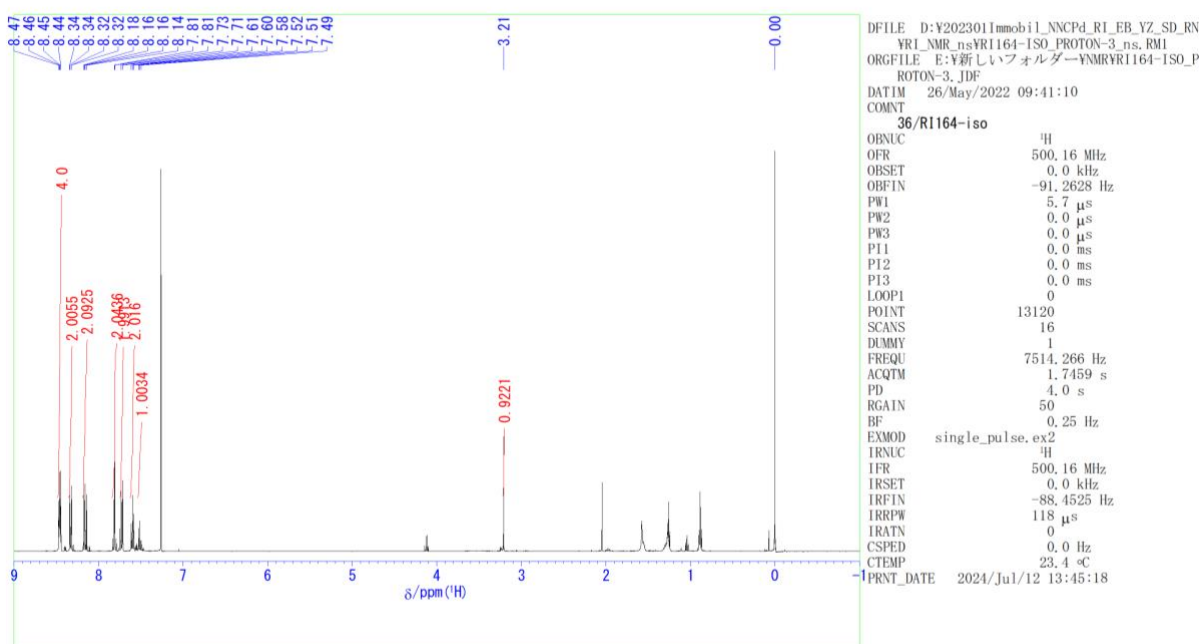

2-13. RAFT agent with NNC-pincer ligand **3**.

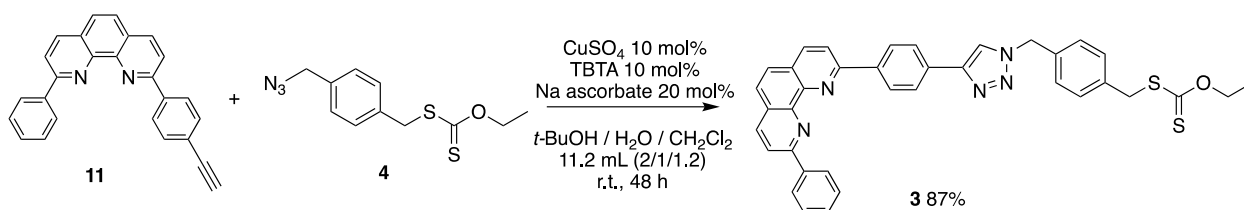

The cycloaddition reaction condition was according to similar substrates.<sup>16</sup>

In a dried Schlenk tube, **11** (0.185 g, 0.52 mmol) and **4** (0.139 g, 0.52 mmol), tris[(1-benzyl-1*H*-1,2,3-triazol-4-yl)methyl]amine (TBTA) (0.0275 g, 0.052 mmol), sodium *L*-ascorbate (0.0207 g, 0.104 mmol) were added in *t*-BuOH (5.3 mL)/ H<sub>2</sub>O (2.7 mL)/ CH<sub>2</sub>Cl<sub>2</sub> (3.2 mL). After stirring until the substrates were dissolved, copper(II) sulfate (82.9 mg, 0.052 mmol) was added and the mixture was stirred at r.t. for 48 h. The solution immediately turned black. After the reaction completed, volatiles were removed in vacuo. Potassium cyanide (329 mg, 5.05 mmol) in water (50 mL) and methanol were added to the residue and sonicated for 1 h. The mixture with light yellow precipitate was concentrated in vacuo to remove volatiles, and the concentrated aqueous mixture was extracted with dichloromethane. The organic layer was washed twice with deionized water and dried over magnesium sulfate. The desiccant was filtered off and the filtrate was concentrated in vacuo. The residue was purified by column chromatograph on silica gel (hexane/ethyl acetate = 1/1) to afford the title compound as yellow solid (281 mg, 87%).

<sup>1</sup>H NMR (CDCl<sub>3</sub>, Me<sub>4</sub>Si, 500 MHz): δ = 1.42 (t, *J* = 7.3 Hz, 3H, CH<sub>3</sub>), 4.38 (s, 2H, CH<sub>2</sub>S), 4.66 (qt, *J* = 7.3 Hz, 2H, OCH<sub>2</sub>), 5.59 (s, 2H, NCH<sub>2</sub>), 7.29 (d, *J* = 8.1 Hz, 2H, CH<sub>2</sub>), 7.40 (d, *J* = 8.1 Hz, 2H, CH<sub>2</sub>), 7.50 (t, *J* = 7.4 Hz, 1H), 7.59 (t, *J* = 7.5 Hz, 2H), 7.79 (d, *J* = 6 Hz, 2H), 7.80 (s, 1H), 8.03 (d, *J* = 8.5 Hz, 2H), 8.17 (t, *J* = 8.5 Hz, 2H), 8.32 (dd, *J* = 8.5, 1.1 Hz, 2H), 8.47 (dd, *J* = 8.1, 1.1 Hz, 2H), 8.53 (d, *J* = 8.5 Hz, 2H).

<sup>13</sup>C {<sup>1</sup>H} NMR (CDCl<sub>3</sub>, Me<sub>4</sub>Si, 125.8 MHz): δ = 13.8 (CH<sub>3</sub>), 39.9 (CH<sub>2</sub>), 53.9 (CH<sub>2</sub>), 70.3 (CH<sub>2</sub>), 119.9 (CH×2), 120.1 (CH), 126.06 (CH), 126.10 (CH×2), 127.7 (CH×2), 127.99 (q), 128.03 (q), 128.11 (CH×2), 128.40 (CH×2), 128.87 (CH×2), 129.52 (CH), 129.91 (CH×2), 131.45 (q), 133.98 (q), 136.87 (q), 136.99 (CH×2), 139.09 (q), 139.42 (q), 146.07 (q), 146.12 (q), 148.00 (q), 156.12 (q), 156.86 (q), 213.69 (q).

High resolution MS (ESI): [M-H] calcd for C<sub>37</sub>H<sub>30</sub>N<sub>5</sub>OS<sub>2</sub> = 624.1892, found = 624.1866.

# $^1\text{H}$ NMR

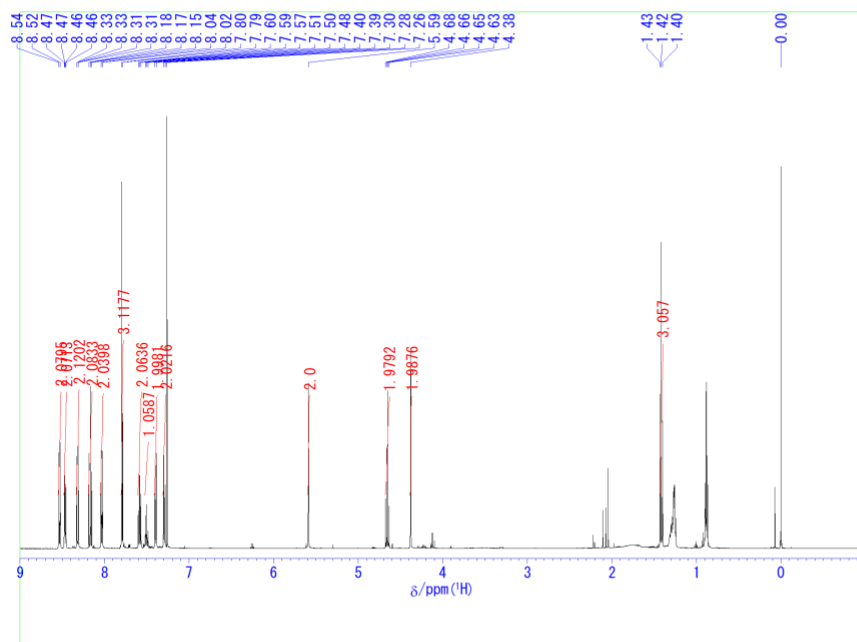

DFILE D:\Y202301\Immobil\_NNCPd\_RI\_EB\_YZ\_SD\_RN  
 YRI\_NMR\_nsYRI166-ISO-2\_PROTON-3\_ns.RM1  
 ORGFILE E:\新しいフォルダー\YMR\YRI166-ISO-2  
 PROTON-3\_JDF  
 DATIM 03/Jun/2022 15:19:47  
 COMNT  
**36/R1166-iso-2**  
 OBNUC  $^1\text{H}$   
 OFR 500.16 MHz  
 OBSET 0.0 kHz  
 OBFIN -91.8356 Hz  
 PW1 5.7  $\mu\text{s}$   
 PW2 0.0  $\mu\text{s}$   
 PW3 0.0  $\mu\text{s}$   
 P11 0.0 ms  
 P12 0.0 ms  
 P13 0.0 ms  
 LOOP1 0  
 POINT 13120  
 SCANS 16  
 DUMMY 1  
 FREQU 7514.266 Hz  
 ACQTM 1.7459 s  
 PD 4.0 s  
 RGAIN 48  
 BF 0.25 Hz  
 EXMOD single\_pulse\_ex2  
 IRNUC  $^1\text{H}$   
 IFR 500.16 MHz  
 IRSET 0.0 kHz  
 IRFIN -88.4525 Hz  
 IRRPW 92  $\mu\text{s}$   
 IRATN 0  
 CSPED 0.0 Hz  
 CTEMP 24.5  $^{\circ}\text{C}$   
 PRNT\_DATE 2024/Jul/12 14:05:59

# $^{13}\text{C}\{^1\text{H}\}$ NMR

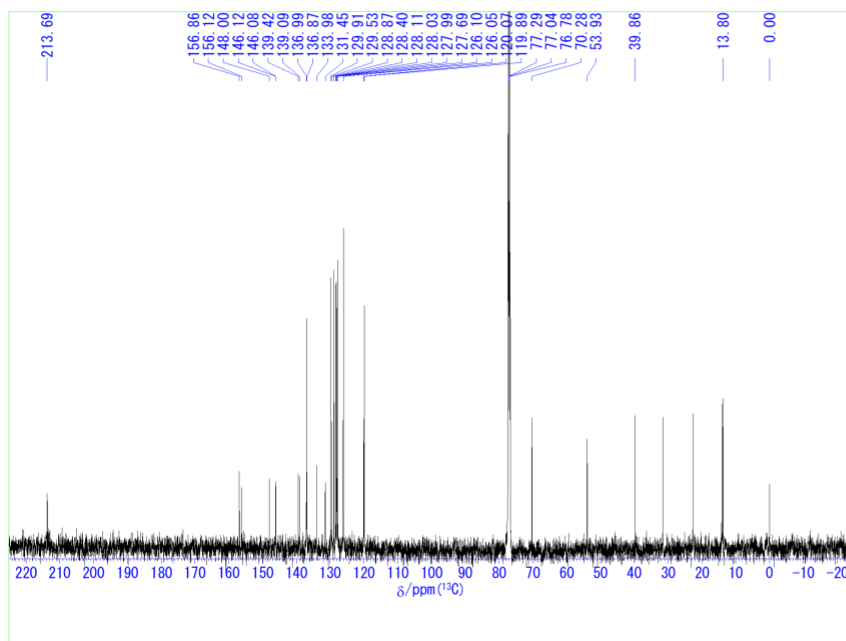

DFILE D:\Y202301\IMMOBIL\_NNCPD\_RI\_EB\_YZ\_SD\_RN  
 YRI\_NMR\_NSYRI166-C\_D\_CARBON-3\_NS.RM1  
 ORGFILE E:\YMR\YRI166-C\_D\_CARBON-3\_JDF  
 DATIM 04/Jun/2022 13:48:41  
 COMNT  
**36/R1166-c, d**  
 OBNUC  $^{13}\text{C}$   
 OFR 125.77 MHz  
 OBSET -5.0 kHz  
 OBFIN 301.0403 Hz  
 PW1 4.1917  $\mu\text{s}$   
 PW2 0.0  $\mu\text{s}$   
 PW3 0.0  $\mu\text{s}$   
 P11 0.0 ms  
 P12 0.0 ms  
 P13 0.0 ms  
 LOOP1 0  
 POINT 26224  
 SCANS 1024  
 DUMMY 4  
 FREQU 31456.86 Hz  
 ACQTM 0.8336 s  
 PD 2.0 s  
 RGAIN 50  
 BF 0.25 Hz  
 EXMOD single\_pulse\_dec  
 IRNUC  $^1\text{H}$   
 IFR 500.16 MHz  
 IRSET 0.0 kHz  
 IRFIN -88.4525 Hz  
 IRRPW 92  $\mu\text{s}$   
 IRATN 0  
 CSPED 0.0 Hz  
 CTEMP 24.6  $^{\circ}\text{C}$   
 PRNT\_DATE 2024/Jul/12 14:13:15

DEPT

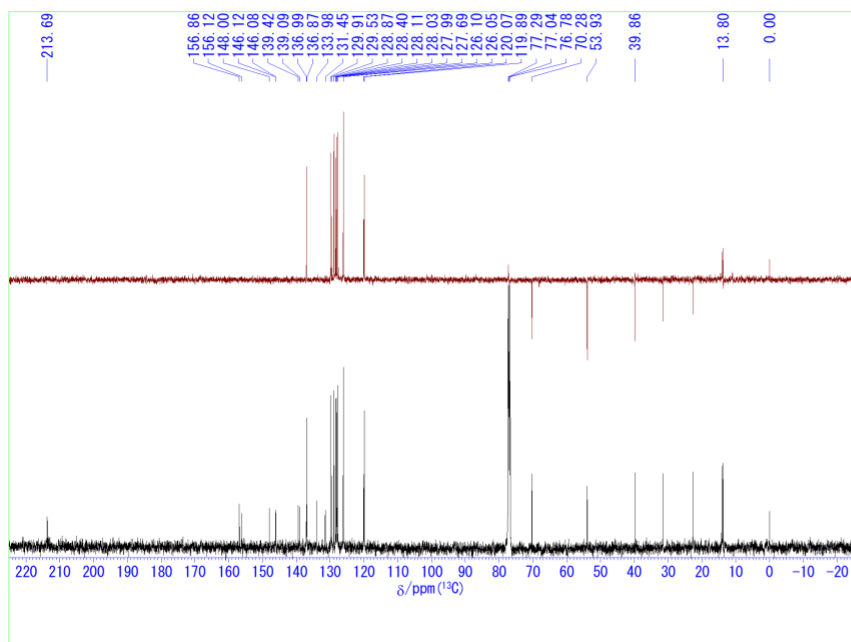

DFILE D:\Y202301\immobil\_NNCPd\_R1\_EB\_YZ\_SD\_RN  
 YR1\_NMR\_nsYR1166-C, D\_CARBON-3\_ns.RM1  
 ORGFILE E:\YMR\YR1166-C, D\_CARBON-3, JDF  
 DATIM 04/Jun/2022 13:48:41  
 COMNT  
**36/R1166-c, d**  
 OBNUC <sup>13</sup>C  
 OFR 125.77 MHz  
 OBSSET -5.0 kHz  
 OBFIN 301.0403 Hz  
 PW1 4.1917 μs  
 PW2 0.0 μs  
 PW3 0.0 μs  
 P11 0.0 ms  
 P12 0.0 ms  
 P13 0.0 ms  
 LOOP1 0  
 POINT 26224  
 SCANS 1024  
 DUMMY 4  
 FREQU 31456.86 Hz  
 ACQTM 0.8336 s  
 PD 2.0 s  
 RGAIN 50  
 BF 0.25 Hz  
 EXMOD single\_pulse\_dec  
 IRNUC <sup>1</sup>H  
 IFR 500.16 MHz  
 IRSET 0.0 kHz  
 IRFIN -88.4525 Hz  
 IRRPW 92 μs  
 IRATN 0  
 CSPED 0.0 Hz  
 CTEMP 24.6 °C  
 PRNT\_DATE 2024/Jul/12 14:11:19

2-14. Polymerization of *N*-isopropylacrylamide using **3** as a RAFT agent.

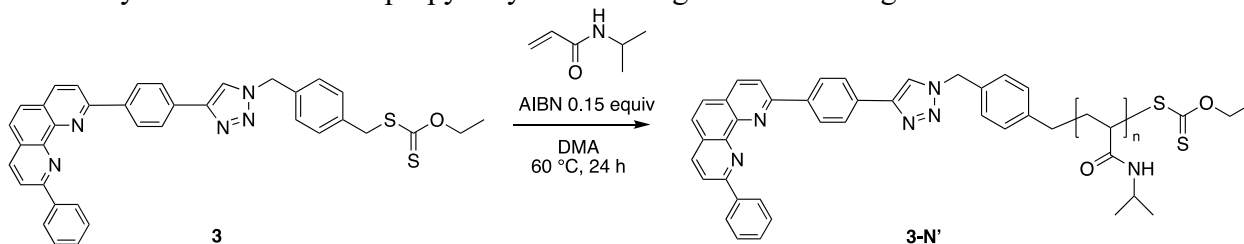

A Schlenk tube was thoroughly dried and filled with argon. In this tube, **3** (281 mg, 0.45 mmol), *N*-isopropylacrylamide (NIPAAm) (1.02 g, 9.0 mmol) and azobis(isobutyronitrile) (AIBN) (25 mg, 0.15 mmol) were dissolved in dimethylacetamide (DMA) (9 mL) and degassed by three cycles of freeze-pump-thaw. The solution was stirred at 60 °C for 24 h, and the mixture was poured into hexane/diethyl ether (250/100 mL). The yellow precipitate was dissolved in chloroform to recover and the volatile was removed in vacuo to afford the title compound as yellow solid (1.203 g, 92%). The polymerization degree was determined by <sup>1</sup>H NMR ( $n = 45$ ,  $M_n = 5,700$ ). Gel permeation chromatography (GPC) was measured using polyethylene glycol as standard ( $M_w = 4,900$ ,  $M_w/M_n = 1.23$ ).

<sup>1</sup>H NMR (CDCl<sub>3</sub>, Me<sub>4</sub>Si, 500 MHz):  $\delta = 1.14$  (br, CH(CH<sub>3</sub>)<sub>2</sub>), 1.64 (br, CH<sub>2</sub> in the main chain), 2.31 (br, CH in the main chain), 4.00 (br, CH(CH<sub>3</sub>)<sub>2</sub>), 4.62 (br, 2H, OCH<sub>2</sub>CH<sub>3</sub>), 7.50 (t,  $J = 7.1$  Hz, 1H), 7.59 (t,  $J = 7.5$  Hz, 2H), 7.81 (m, 3H), 8.04 (d,  $J = 8.1$  Hz, 2H), 8.18 (t,  $J = 8.6$  Hz, 2H), 8.33 (d,  $J = 8.6$ , 2H), 8.47 (d,  $J = 7.9$  Hz, 2H), 8.54 (d,  $J = 8.5$  Hz, 2H).

<sup>1</sup>H NMR

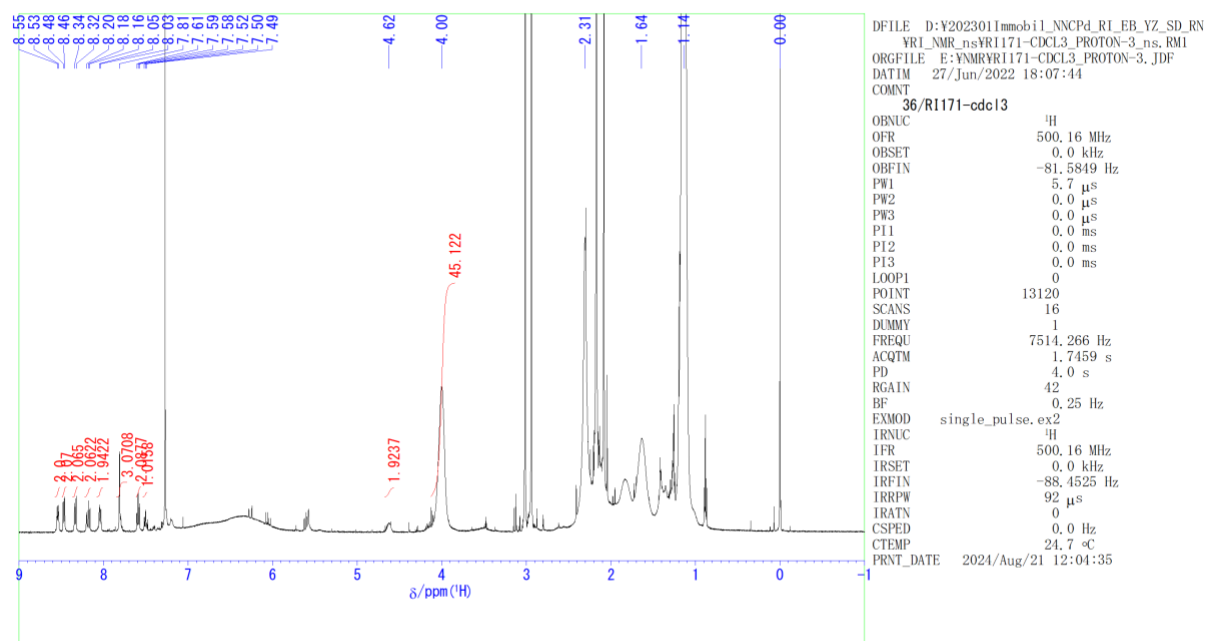

The GPC spectrum for 3-N'.

20220718\_0718 RI171\_006 2023/01/23 10:29:18

クロマトグラム

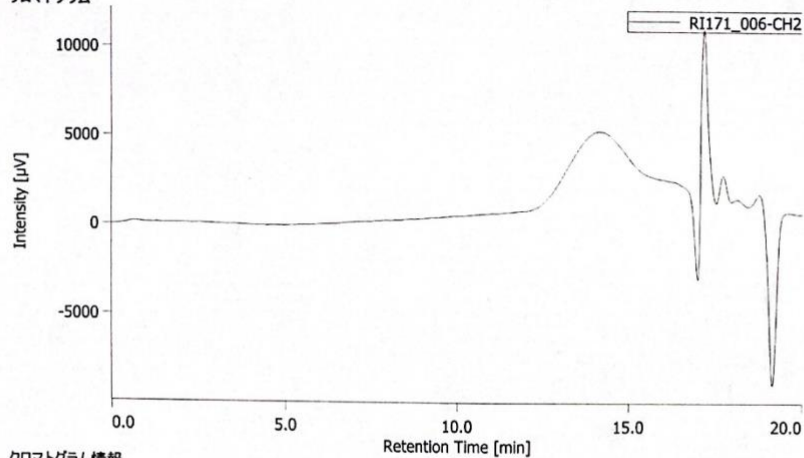

クロマトグラム情報

ユーザー名 Administrator  
 更新日時 2022/07/19 16:26:01  
 コメント  
 HPLC システム名 ChromNAV Lite  
 測定日 2022/07/18 18:22:10  
 注入量 10.0 [μL]  
 サンプル# -  
 プロジェクト名 KY  
 取込時間 0.0 [min]

測定シーケンス

コントロールメソッド

ピークIDテーブル

検量線テーブル

追加情報

カラム情報

クロマトグラムラベル

測定済みシーケンス

クロマトグラム名

サンプル名

分子量分布曲線

分子量分布曲線 全区間

20220718\_0718 2022/07/18 15:09:35  
 RI171\_006  
 RI171

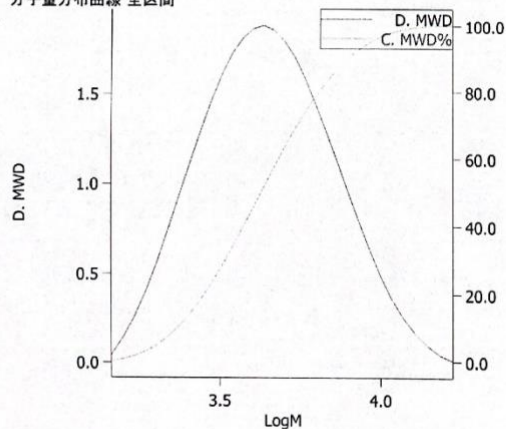

分子量計算結果

<ファイル情報>

ファイル名 20220718RI2  
 ユーザー名 Administrator  
 更新日時 2022/07/18 18:45:12  
 コメント

<分子量計算結果(全区間)>

| # | 区間範囲 | CH | Mp  | Mn   | Mw   | Mz   | Mv   | Mw/Mn  |
|---|------|----|-----|------|------|------|------|--------|
| 1 | 全区間  | 2  | --- | 3979 | 4900 | 6040 | 4900 | 1.2316 |

| # | Mz/Mw  | 区間値    | 百分率 | 警告 | サンプル名 |
|---|--------|--------|-----|----|-------|
| 1 | 1.2326 | 333726 | --- |    | RI171 |

# サンプルコメント

1

<分子量計算結果(区間別)>

| # | 区間範囲              | CH | ベースライン範囲          | tR      | Mp   |
|---|-------------------|----|-------------------|---------|------|
| 1 | 12.3000 - 15.5000 | 2  | 12.3000 - 15.5000 | 14.1167 | 4083 |

| # | Mn   | Mw   | Mz   | Mv   | Mw/Mn  | Mz/Mw  | 区間値    |
|---|------|------|------|------|--------|--------|--------|
| 1 | 3979 | 4900 | 6040 | 4900 | 1.2316 | 1.2326 | 333726 |

| # | 百分率    | 警告 | サンプル名 | サンプルコメント |
|---|--------|----|-------|----------|
| 1 | 100.00 |    | RI171 |          |

## 2-15. Preparation of **3-N**: Removal of xanthogenate terminus of **3-N'**

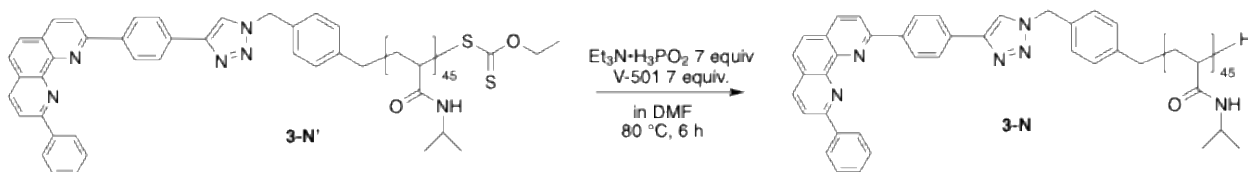

The xanthogenate terminus of **3-N'** (571 mg, 0.1 mmol) was removed in a similar manner to **2-N'** using 7 equiv of triethylammonium hypophosphite and V-501. Yellow solid, 425 mg, 76%. The polymerization degree was determined by  $^1\text{H}$  NMR (PD = 45,  $M_n$  = 5,600). Gel permeation chromatography (GPC) was measured using polyethylene glycol as standard ( $M_w$  = 4,800,  $M_w/M_n$  = 1.23).

$^1\text{H}$  NMR ( $\text{CDCl}_3$ ,  $\text{Me}_4\text{Si}$ , 500 MHz):  $\delta$  1.14 (br,  $\text{CH}(\text{CH}_3)_2$ ), 1.63 (br,  $\text{CH}_2$  in the main chain), 2.12 (br,  $\text{CH}$  in the main chain), 4.00 (br,  $\text{NCH}$ ), 7.50 (t,  $J = 7.1$  Hz, 1H), 7.59 (t,  $J = 7.5$  Hz, 2H), 7.78-7.81 (m, 3H), 8.04 (d,  $J = 8$  Hz, 2H), 8.18 (t,  $J = 8.6$  Hz, 2H), 8.33 (d,  $J = 8.6$  Hz, 2H), 8.48 (d,  $J = 8$  Hz, 2H), 8.54 (d,  $J = 8$  Hz, 2H).

$^1\text{H}$  NMR

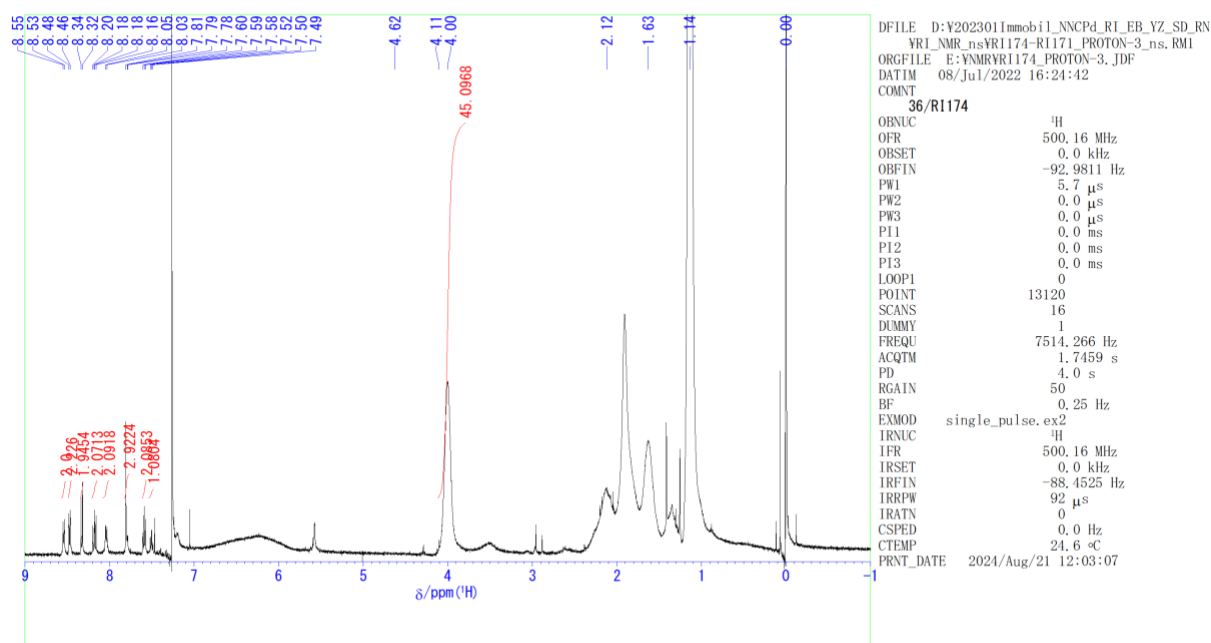

The GPC spectrum of 3-N

20220718\_0718 RI174-2\_013 2023/01/23 10:30:42

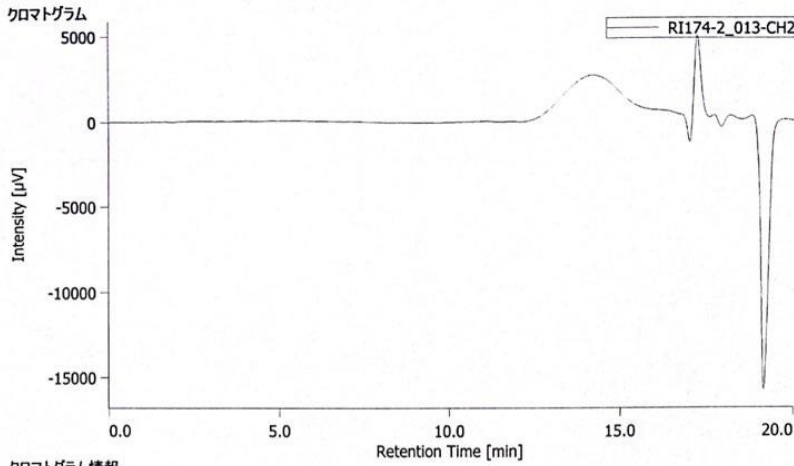

**クロマトグラム情報**  
 ユーザー名 Administrator  
 更新日時 2022/07/19 16:26:01  
 コメント  
 HPLC システム名 ChromNAV Lite  
 測定日 2022/07/19 15:58:34  
 注入量 10.0 [μL]  
 サンプル# -  
 プロジェクト名 KY  
 取込時間 0.0 [min]  
 測定シーケンス  
 コントロールメソッド  
 ピークIDテーブル  
 検量線テーブル  
 追加情報  
 カラム情報  
 クロマトグラムラベル  
 測定済みシーケンス  
 クロマトグラム名 RI174-2\_013  
 サンプル名 RI174-2  
 分子量分布曲線 全区間

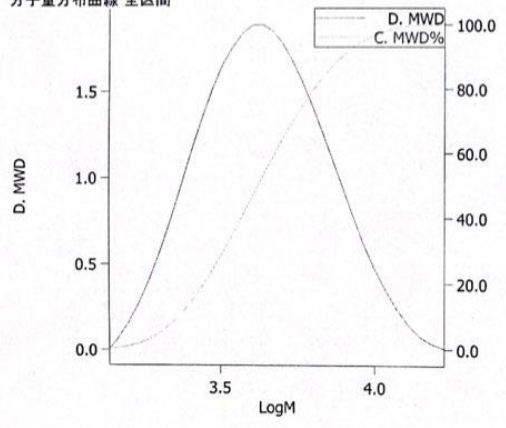

**分子量計算結果**

<ファイル情報>  
 ファイル名 20220718RI2  
 ユーザー名 Administrator  
 更新日時 2022/07/19 15:54:49  
 コメント

<分子量計算結果(全区間)>

| # | 区間範囲 | CH | Mp  | Mn   | Mw   | Mz   | Mv   | Mw/Mn  |
|---|------|----|-----|------|------|------|------|--------|
| 1 | 全区間  | 2  | --- | 3937 | 4840 | 5961 | 4840 | 1.2295 |

# Mz/Mw 区間値 百分率 警告 サンプル名  
 1 1.2315 219580 --- RI174-2

# サンプルコメント  
 1

<分子量計算結果(区間別)>

| # | 区間範囲              | CH | ベースライン範囲          | tR      | Mp   |
|---|-------------------|----|-------------------|---------|------|
| 1 | 12.3000 - 15.5200 | 2  | 12.3000 - 15.5200 | 14.1500 | 3986 |

| # | Mn   | Mw   | Mz   | Mv   | Mw/Mn  | Mz/Mw  | 区間値    |
|---|------|------|------|------|--------|--------|--------|
| 1 | 3937 | 4840 | 5961 | 4840 | 1.2295 | 1.2315 | 219580 |

# 百分率 警告 サンプル名 サンプルコメント  
 1 100.00 --- RI174-2



## 2-16. Preparation of polymer-immobilized Pd-complex **Pd-3-N**.

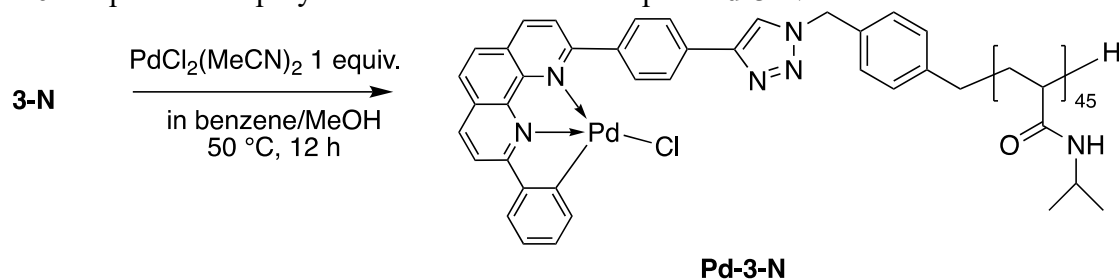

In a dried Schlenk tube filled with argon, **3-N** (140 mg, 0.025 mmol) and bis(acetonitrile)dichloropalladium (6.5 mg, 0.025 mmol) were dissolved in a mixture of benzene (1.2 mL) and methanol (1.5 mL), and the mixture was stirred at 50 °C for 12 h. The dark orange solution was filtered and washed with a small amount of dichloromethane, methanol and diethyl ether in this order. Recovered solid was dried in vacuo to give orange solid (164 mg). ICP analysis indicated that Pd content was 1.87 wt% (1.86 wt% calcd.)

$^1\text{H NMR}$  ( $\text{CDCl}_3$ ,  $\text{Me}_4\text{Si}$ , 500 MHz):  $\delta$  1.13 (br,  $\text{CH}(\text{CH}_3)_2$ ), 1.64 (br,  $\text{CH}_2$  in the main chain), 2.15 (br,  $\text{CH}$  in the main chain), 3.99 (br,  $\text{CH}-(\text{CH}_3)_2$ ), 7.47-8.50 (m, 16H).

$^1\text{H NMR}$

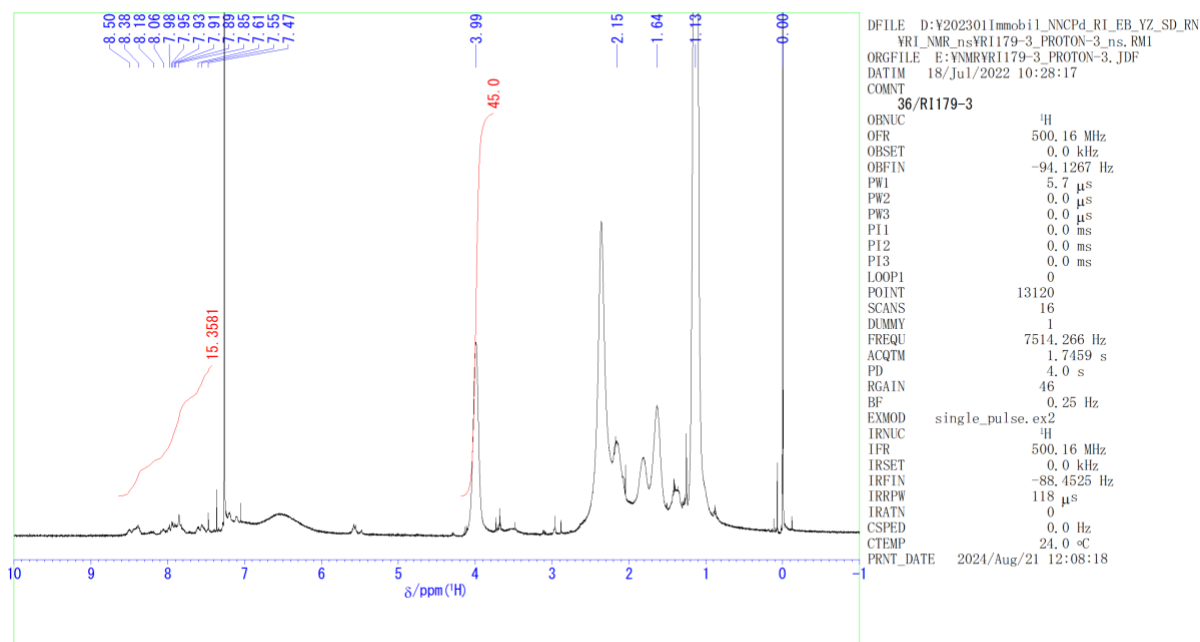

The GPC spectrum of Pd-3-N

20220718\_0718 RI179\_004 2023/01/23 10:28:56

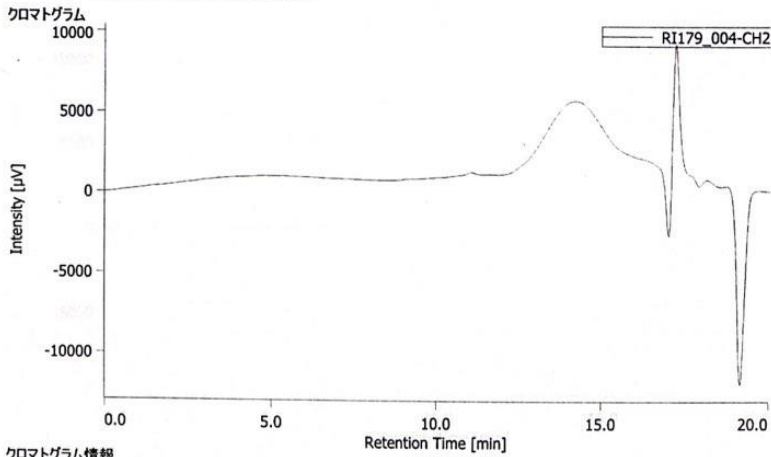

クロマトグラム情報

ユーザー名 Administrator  
 更新日時 2022/07/19 16:26:00  
 コメント  
 HPLC システム名 ChromNAV Lite  
 測定日 2022/07/18 17:25:12  
 注入量 10.0 [μL]  
 サンプル# -  
 プロジェクト名 KY  
 取込時間 0.0 [min]

20220718\_0718 2022/07/18 15:09:35  
 RI179\_004  
 RI179

分子量分布曲線 全区間

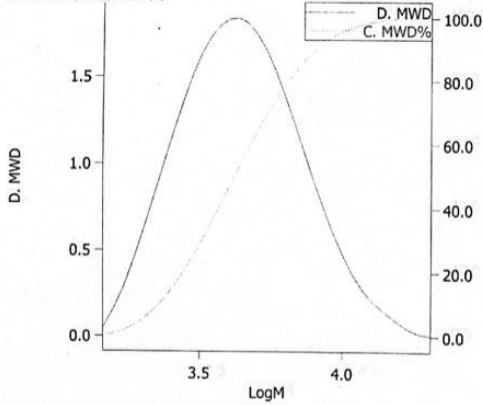

分子量計算結果

<ファイル情報>

ファイル名 20220718RI2  
 ユーザー名 Administrator  
 更新日時 2022/07/18 18:42:46  
 コメント

<分子量計算結果(全区間)>

| # | 区間範囲 | CH | Mp  | Mn   | Mw   | Mz   | Mv   | Mw/Mn  |
|---|------|----|-----|------|------|------|------|--------|
| 1 | 全区間  | 2  | --- | 3932 | 4913 | 6215 | 4913 | 1.2496 |

| # | Mz/Mw  | 区間値    | 百分率 | 警告 | サンプル名 |
|---|--------|--------|-----|----|-------|
| 1 | 1.2650 | 376995 | --- |    | RI179 |

<分子量計算結果(区間別)>

| # | 区間範囲              | CH | ベースライン範囲          | tR      | Mp   |
|---|-------------------|----|-------------------|---------|------|
| 1 | 12.1000 - 15.5000 | 2  | 12.1000 - 15.5000 | 14.1417 | 4010 |

| # | Mn   | Mw   | Mz   | Mv   | Mw/Mn  | Mz/Mw  | 区間値    |
|---|------|------|------|------|--------|--------|--------|
| 1 | 3932 | 4913 | 6215 | 4913 | 1.2496 | 1.2650 | 376995 |

| # | 百分率    | 警告 | サンプル名 | サンプルコメント |
|---|--------|----|-------|----------|
| 1 | 100.00 |    | RI179 |          |

### 3. Catalytic reactions using thermo-responsive Pd catalysts in water

#### 3-1. Mizoroki-Heck reactions in water using Pd-2-N.

Typical procedure for Mizoroki-Heck reaction in water using the thermo-responsive catalysts in the presence of the thermo-responsive copolymer surfactant NS is as follows. In a test tube with a screw cap, NS (40 mg) was dissolved in deionized water (4 mL) and the solution was stirred. To this solution, iodobenzene (**6a**) (102 mg, 0.5 mmol), *n*-butyl acrylate (**7a**) (128 mg, 1.0 mmol), tri-*n*-butylamine (185 mg, 1.0 mmol), catalyst Pd-2-N (e.g. 22.5 mg, containing 0.005 mmol Pd), hydrazine monohydrate (2.5 mg, 50  $\mu$ mol) were added, and the mixture was stirred at 70 °C for 48 h. Opaque suspension turned clear by heating, and became reddish solution through the reaction. Ethyl acetate (0.4 mL) was added and stirred for 5 min and centrifuged. The organic layer was separated and repeated the extraction until the product was not observed by thin layer chromatograph (TLC) in the extract. The combined organic layer was analyzed by  $^1\text{H}$  NMR and gas chromatograph to determine yield of the product **8aa** (96%).

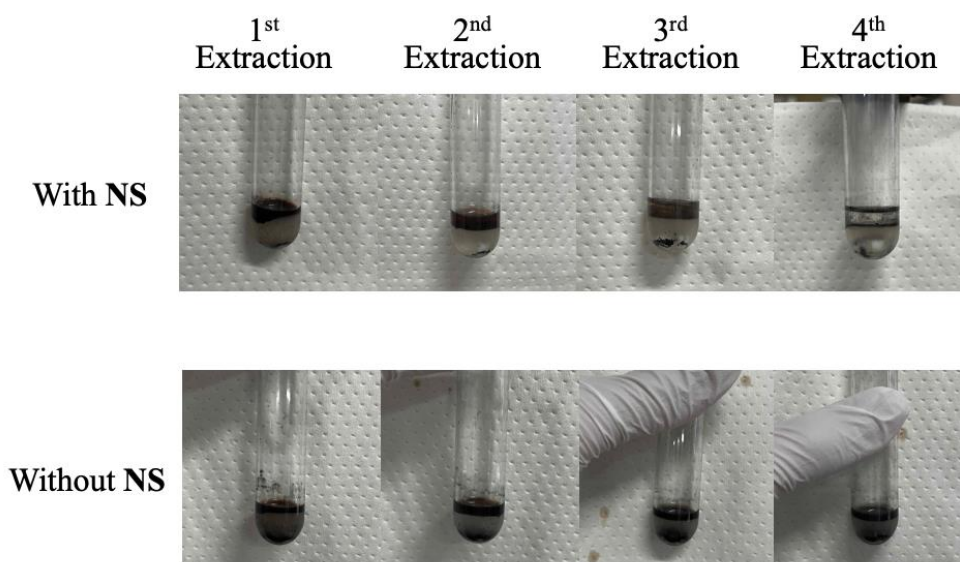

Figure S1. Appearance of extraction of the reaction mixture with ethyl acetate

Table S1. Mizoroki-Heck reactions in water using Pd catalysts.<sup>a</sup>

**6**                      **7**                      **8aa: R<sup>1</sup> = H, R<sup>2</sup> = COO<sup>n</sup>Bu**  
**a: X = I, R<sup>1</sup> = H**      **a: R<sup>2</sup> = COO<sup>n</sup>Bu**      **8ba: R<sup>1</sup> = Ac, R<sup>2</sup> = COO<sup>n</sup>Bu**  
**b: X = I, R<sup>1</sup> = Ac**      **b: R<sup>2</sup> = Ph**              **8ab: R<sup>1</sup> = H, R<sup>2</sup> = Ph**

| entry | ArI <b>6</b> | Alkenes <b>7</b> | surfactant                  | Catalysts                       | base                           | Products   | Yield of <b>8</b> / % <sup>b</sup> |
|-------|--------------|------------------|-----------------------------|---------------------------------|--------------------------------|------------|------------------------------------|
| 1     |              |                  | NS                          | <b>Pd-2-N</b>                   | <i>n</i> -Bu <sub>3</sub> N    | <b>8aa</b> | 92                                 |
| 2     |              |                  | NS                          | <b>Pd-5</b><br>(small molecule) | <i>n</i> -Bu <sub>3</sub> N    | <b>8aa</b> | 33                                 |
| 3     |              |                  | NS                          | <b>Pd-2-N</b>                   | <i>n</i> -Bu <sub>3</sub> N    | <b>8ba</b> | >99                                |
| 4     |              |                  | NS                          | <b>Pd-2-N</b>                   | <i>n</i> -Bu <sub>3</sub> N    | <b>8ab</b> | 9                                  |
| 5     | <b>6a</b>    | <b>7a</b>        | SDS                         | <b>Pd-2-N</b>                   | <i>n</i> -Bu <sub>3</sub> N    | <b>8aa</b> | >99                                |
| 6     | <b>6a</b>    | <b>7a</b>        | Triton X-100                | <b>Pd-2-N</b>                   | <i>n</i> -Bu <sub>3</sub> N    | <b>8aa</b> | >99                                |
| 7     | <b>6a</b>    | <b>7a</b>        | Tween20                     | <b>Pd-2-N</b>                   | <i>n</i> -Bu <sub>3</sub> N    | <b>8aa</b> | >99                                |
| 8     | <b>6a</b>    | <b>7a</b>        | CTAB                        | <b>Pd-2-N</b>                   | <i>n</i> -Bu <sub>3</sub> N    | <b>8aa</b> | 81                                 |
| 9     | <b>6a</b>    | <b>7a</b>        | none                        | <b>Pd-2-N</b>                   | <i>n</i> -Bu <sub>3</sub> N    | <b>8aa</b> | 86                                 |
| 10    | <b>6a</b>    | <b>7a</b>        | NS                          | <b>Pd-2-N</b>                   | K <sub>2</sub> CO <sub>3</sub> | <b>8aa</b> | 23                                 |
| 11    | <b>6a</b>    | <b>7a</b>        | NS                          | <b>Pd-2-N</b>                   | NaOAc                          | <b>8aa</b> | 12                                 |
| 12    | <b>6a</b>    | <b>7a</b>        | NS                          | <b>Pd-2-N</b>                   | K <sub>3</sub> PO <sub>4</sub> | <b>8aa</b> | 29                                 |
| 13    | <b>6a</b>    | <b>7a</b>        | NS<br>(2nd use)             | <b>Pd-2-N</b><br>(2nd use)      | <i>n</i> -Bu <sub>3</sub> N    | <b>8aa</b> | 99                                 |
| 14    | <b>6a</b>    | <b>7a</b>        | (3rd use)                   | (3rd use)                       | <i>n</i> -Bu <sub>3</sub> N    | <b>8aa</b> | >99                                |
| 15    | <b>6a</b>    | <b>7a</b>        | (4th use)                   | (4th use)                       | <i>n</i> -Bu <sub>3</sub> N    | <b>8aa</b> | >99                                |
| 16    | <b>6a</b>    | <b>7a</b>        | (5th use)                   | (5th use)                       | <i>n</i> -Bu <sub>3</sub> N    | <b>8aa</b> | >99                                |
| 17    | <b>6a</b>    | <b>7a</b>        | (6th use)                   | (6th use)                       | <i>n</i> -Bu <sub>3</sub> N    | <b>8aa</b> | >99                                |
| 18    | <b>6a</b>    | <b>7a</b>        | (7th use)                   | (7th use)                       | <i>n</i> -Bu <sub>3</sub> N    | <b>8aa</b> | 58                                 |
| 19    | <b>6a</b>    | <b>7a</b>        | <b>Pd-2-NS</b>              | <b>Pd-2-NS</b>                  | <i>n</i> -Bu <sub>3</sub> N    | <b>8aa</b> | 93                                 |
| 20    | <b>6a</b>    | <b>7a</b>        | <b>Pd-2-NS</b><br>(2nd use) | <b>Pd-2-NS</b><br>(2nd use)     | <i>n</i> -Bu <sub>3</sub> N    | <b>8aa</b> | 97                                 |
| 21    | <b>6a</b>    | <b>7a</b>        | (3rd use)                   | (3rd use)                       | <i>n</i> -Bu <sub>3</sub> N    | <b>8aa</b> | 75                                 |
| 22    | <b>6a</b>    | <b>7a</b>        | (4th use)                   | (4th use)                       | <i>n</i> -Bu <sub>3</sub> N    | <b>8aa</b> | 98                                 |
| 23    | <b>6a</b>    | <b>7a</b>        | (5th use)                   | (5th use)                       | <i>n</i> -Bu <sub>3</sub> N    | <b>8aa</b> | 107                                |

a) Conditions: iodoarene (0.5 mmol), alkene (1.0 mmol), catalyst (0.005 mol Pd atom), hydrazine (0.05 mol), surfactants (40 mg), H<sub>2</sub>O (4 mL), 70 °C, 48 h.

b) determined by <sup>1</sup>H NMR.

### 3-2. Suzuki-Miyaura cross coupling reactions in water using **Pd-2-N**.

Typically, in a test tube with a screw cap, 4-iodoanisole (**6c**) (117 mg, 0.5 mmol) and phenylboronic acid (**9a**) (91 mg, 0.75 mmol), triethylamine (152 mg, 1.5 mmol), **NS** (20 mg) and **Pd-2-N** (e.g. 13 mg, containing 0.005 mmol of Pd) were suspended in water (1 mL). The mixture was stirred at 50 °C for 6 h. The reaction mixture was cooled to 0 °C, and then extracted with ethyl acetate (0.2 mL) followed by centrifugation (400 g for 2 min). The organic layer was analyzed by <sup>1</sup>H NMR using pyrene as an internal standard. Quantitative formation of **10ca** was observed.

Table S2. Suzuki-Miyaura coupling in water using Pd-catalysts.

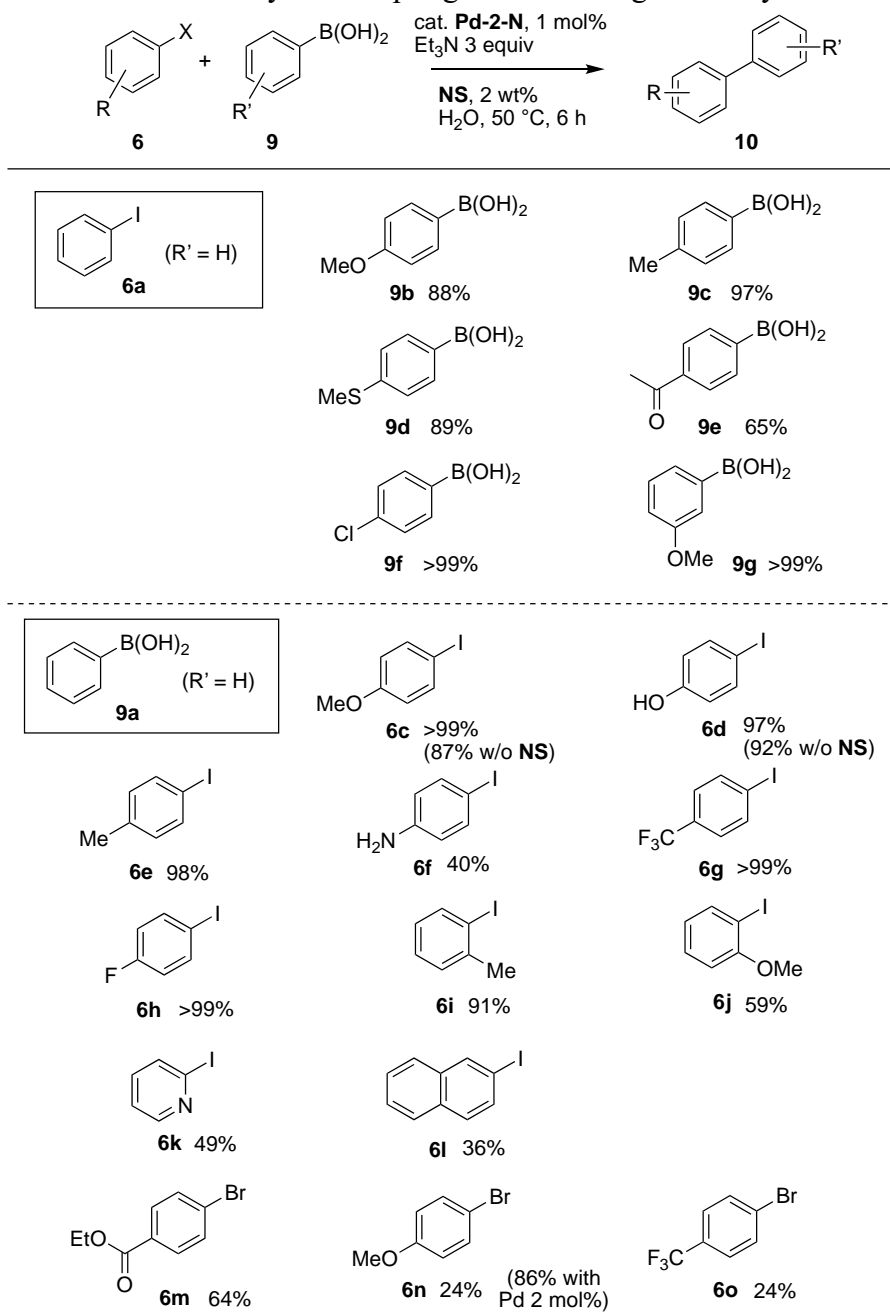

a) Conditions: aryl halide **6** (0.5 mmol), arylboronic acid **9** (0.75 mmol), **Pd-2-N** (containing 1 mol% Pd), Et<sub>3</sub>N (1.5 mmol), **NS** (20 mg), H<sub>2</sub>O (1 mL), yields were determined by <sup>1</sup>H NMR.

3-3. Mizoroki-Heck reactions in water using the copolymers using **Pd-3-N** in the *presence* of **NS**, and reuse of the catalyst solution.

Typical procedure for Mizoroki-Heck reaction in water using the thermo-responsive catalyst **Pd-3-N** in the presence of the thermo-responsive copolymer surfactant **NS** is as follows.

In a test tube with a screw cap, **Pd-3-N** (2.9 mg, 0.5  $\mu\text{mol}$ ) and **NS** (20 mg) was dissolved in deionized water (1 mL) and the solution was stirred at r.t. for 0.5 h. To this solution, iodobenzene (**6a**) (102 mg, 0.5 mmol), *n*-butyl acrylate (**7a**) (128 mg, 1.0 mmol), tri-*n*-butylamine (185 mg, 1.0 mmol), hydrazine monohydrate (2.5 mg, 50  $\mu\text{mol}$ ) were added, and the mixture was stirred at 100 °C for 24 h. Ethyl acetate (1 mL) was added and vigorously stirred and centrifuged. The organic layer was separated and repeated the extraction until the product was not observed by thin layer chromatograph (TLC) in the extract. The combined brownish organic layer was analyzed by  $^1\text{H}$  NMR and/or gas chromatograph to determine yield of the product **8aa** (>99%). When the catalyst solution was reused, the aqueous layer after the extraction were added tributylamine (185 mg, 1.0 mmol), butyl acrylate (128 mg, 1.0 mmol) and Iodobenzene (102 mg, 0.5 mmol). The mixture was stirred at 100 °C for 24 h, and extracted with ethyl acetate (0.4 mL) for three times. The combined organic layer was analyzed by gas chromatography to determine the yield using tetradecane as internal standard.

Table S3. Mizoroki-Heck reactions in water using **Pd-3-N** in the presence of NS.

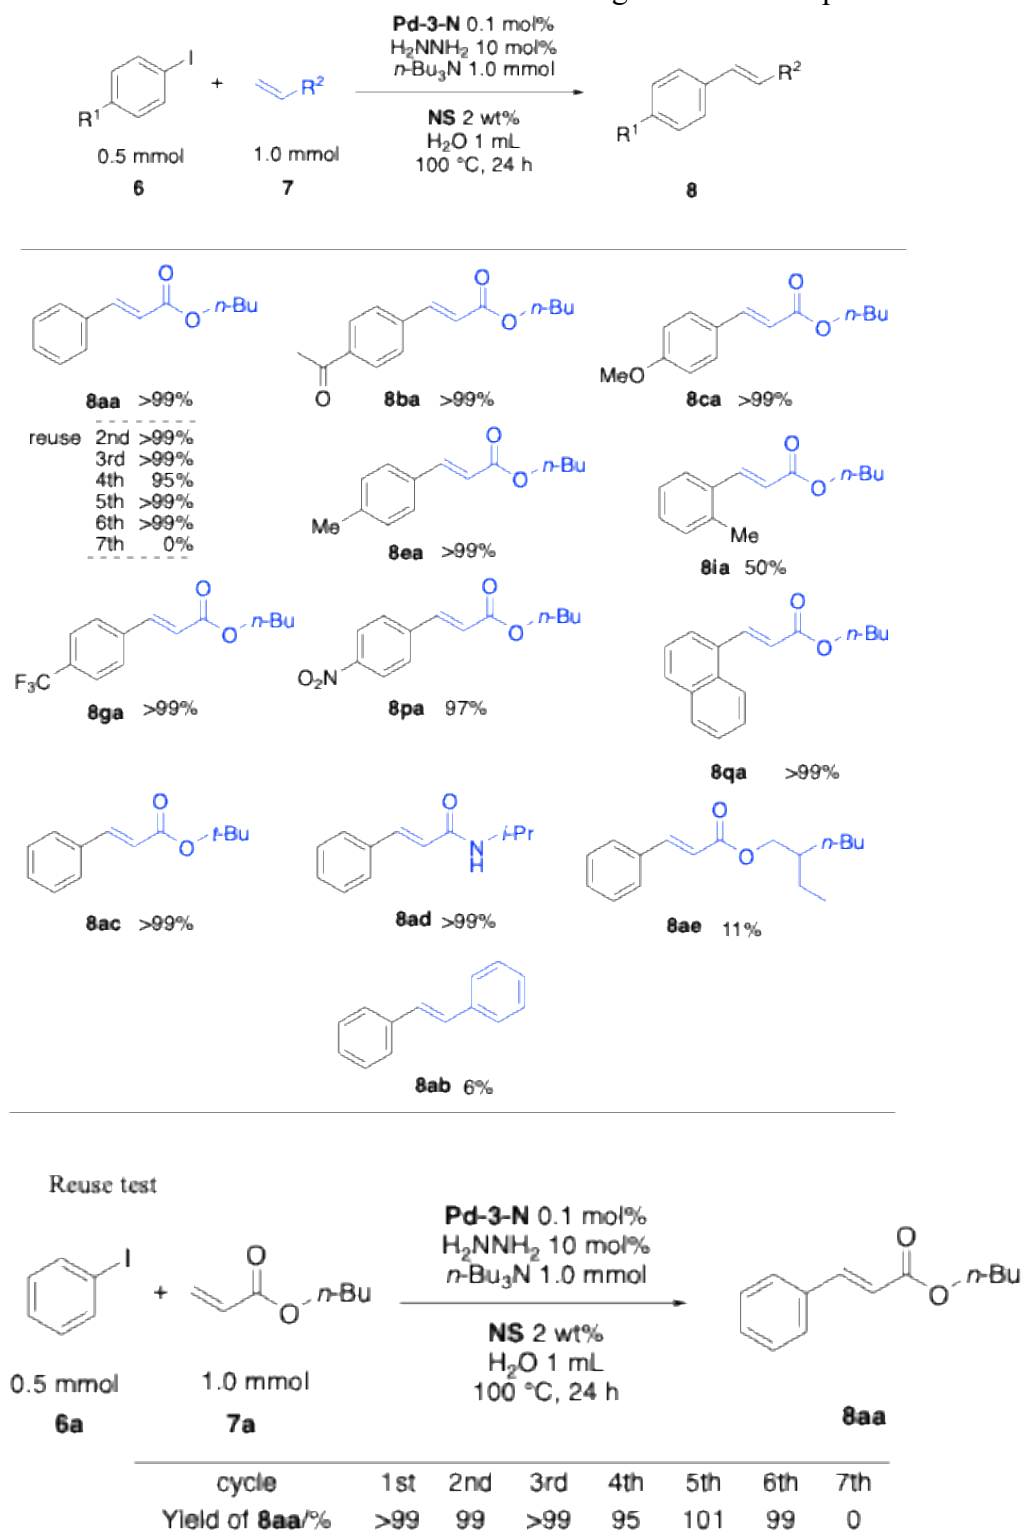

Figure S2. Reuse of the aqueous solution of **Pd-3-N**, in the presence of NS.

3-4. Mizoroki-Heck reactions in water using the copolymers using **Pd-3-N** in the *absence* of **NS**. Typical procedure for Mizoroki-Heck reaction in water using the thermo-responsive catalysts in the *absence* of **NS** is as follows.

Stock solution of the catalyst was prepared by dissolving **Pd-3-N** (2.9 mg, 0.5  $\mu\text{mol}$ ) in degassed water (1 mL) and stirred at r.t. for 10 min. The pale-yellow solution was stored in a refrigerator. In a dried test tube with a screw cap, the catalyst solution (0.1 mL) was added to water (0.9 mL) and the mixture was stirred for 10 min. To this solution, aryl halide (**6**) (0.5 mmol), alkene (**7**) (1.0 mmol), tri-*n*-butylamine (185 mg, 1.0 mmol), hydrazine monohydrate (2.5 mg, 50  $\mu\text{mol}$ ) were added, and the mixture was stirred at 100 °C for 24 h. The mixture was extracted with ethyl acetate (1 mL) and centrifuged. The organic layer was separated and repeated the extraction until the product was not observed by thin layer chromatograph (TLC) in the extract. The combined organic layer was analyzed by  $^1\text{H}$  NMR and gas chromatograph to determine yield of the product **8**. Some of the products were isolated by column chromatograph on silica gel.



Table S4. Mizoroki-Heck reactions in water using **Pd-3-N** in the *absence* of **NS**.<sup>a</sup>

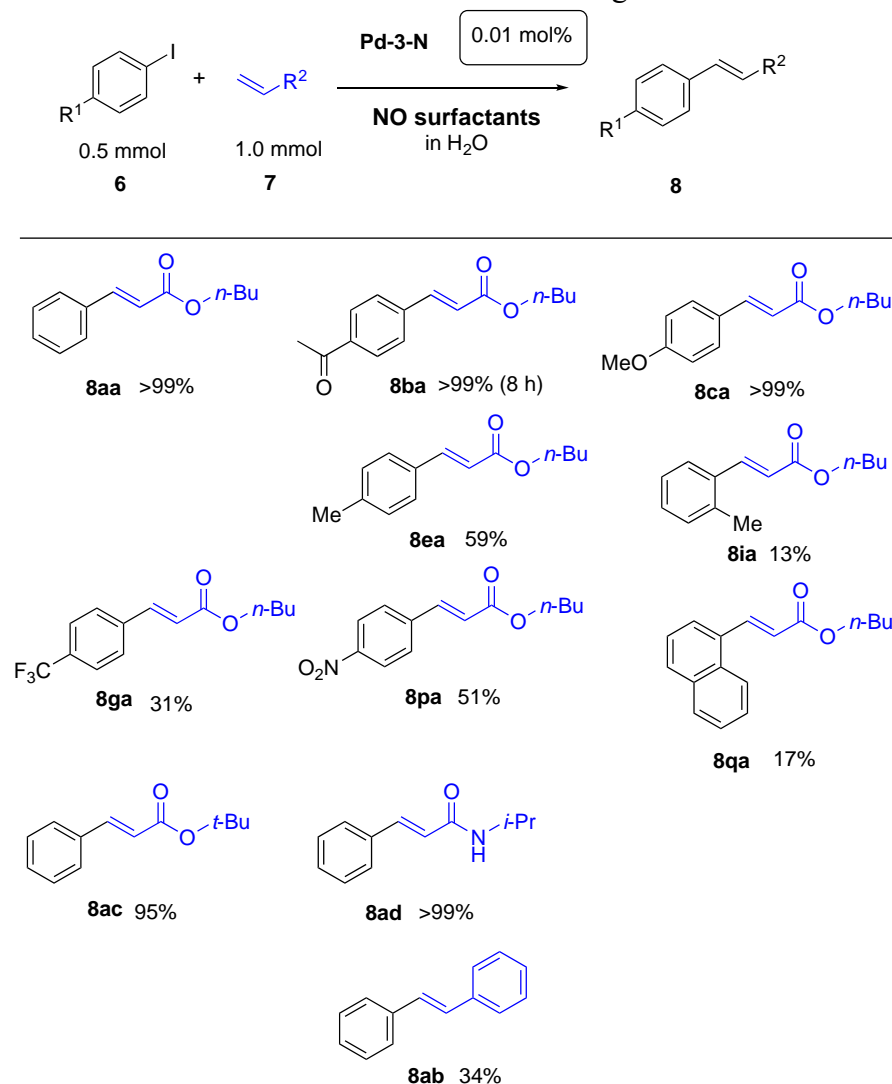

a) conditions: iodoarenes **6** (0.5 mmol), alkenes **7** (1.0 mmol), *n*-Bu<sub>3</sub>N (1.5 mmol), **Pd-3-N** (0.29 mg, 0.05 μmol Pd), N<sub>2</sub>H<sub>4</sub>•H<sub>2</sub>O (0.05 mmol), H<sub>2</sub>O 1 mL, 100 °C, 24 h; Yields were determined by <sup>1</sup>H NMR.

### 3-5. Reuse of the aqueous solution of **Pd-3-N**, with no surfactants in 10 times scale.

In a dried test tube with a screw cap, the catalyst **Pd-3-N** (2.9 mg, 0.5 μmol) was dissolved in water (10 mL) and the mixture was stirred for 10 min. To this solution, iodobenzene (**6a**) (1.02 g, 5.0 mmol), *n*-butyl acrylate (**7a**) (1.28 g, 10 mmol), tri-*n*-butylamine (1.85 g, 10 mmol), hydrazine monohydrate (25 mg, 0.5 mmol) were added, and the mixture was stirred at 100 °C for 8 h. By keeping the solution rest, the mixture spontaneously separated into a brown organic layer, a yellowish aqueous layer and brown organic gel-like precipitate. The mixture was centrifuged to clearly separate them, and the upper organic layer and the bottom precipitate were taken up. The combined organic layer was analyzed by gas chromatography to determine yield of the product **8aa**. To the aqueous layer were added tri-*n*-butylamine (1.85 g, 10 mmol), *n*-butyl acrylate (1.28 g, 10 mmol) and iodobenzene (1.02 g, 5.0 mmol), and the second reaction was conducted.

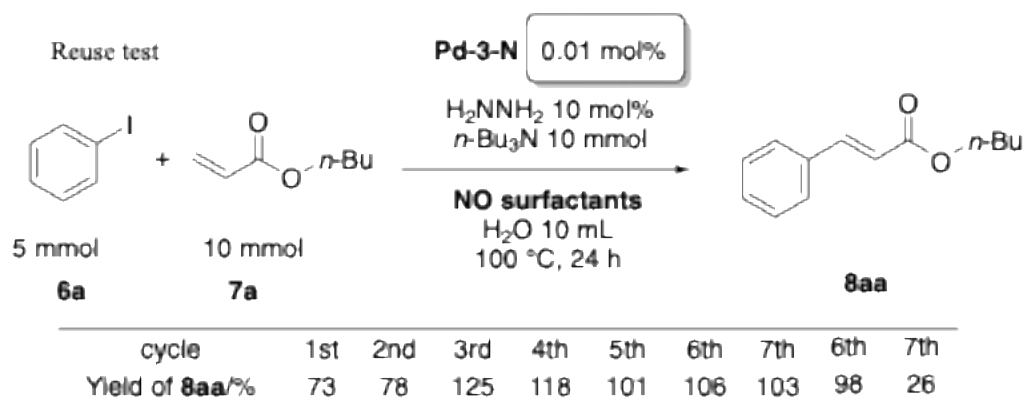

Figure S3. Reuse of the aqueous solution of **Pd-3-N**, in the absence of **NS**.

### 3-6. STEM analysis of the aqueous solution of the catalyst.

The catalytic reactions were carried out under the standard conditions using **Pd-2-N**, the aqueous solution was dried and observed by STEM.

#### 3-6-1. Mizoroki-Heck reaction

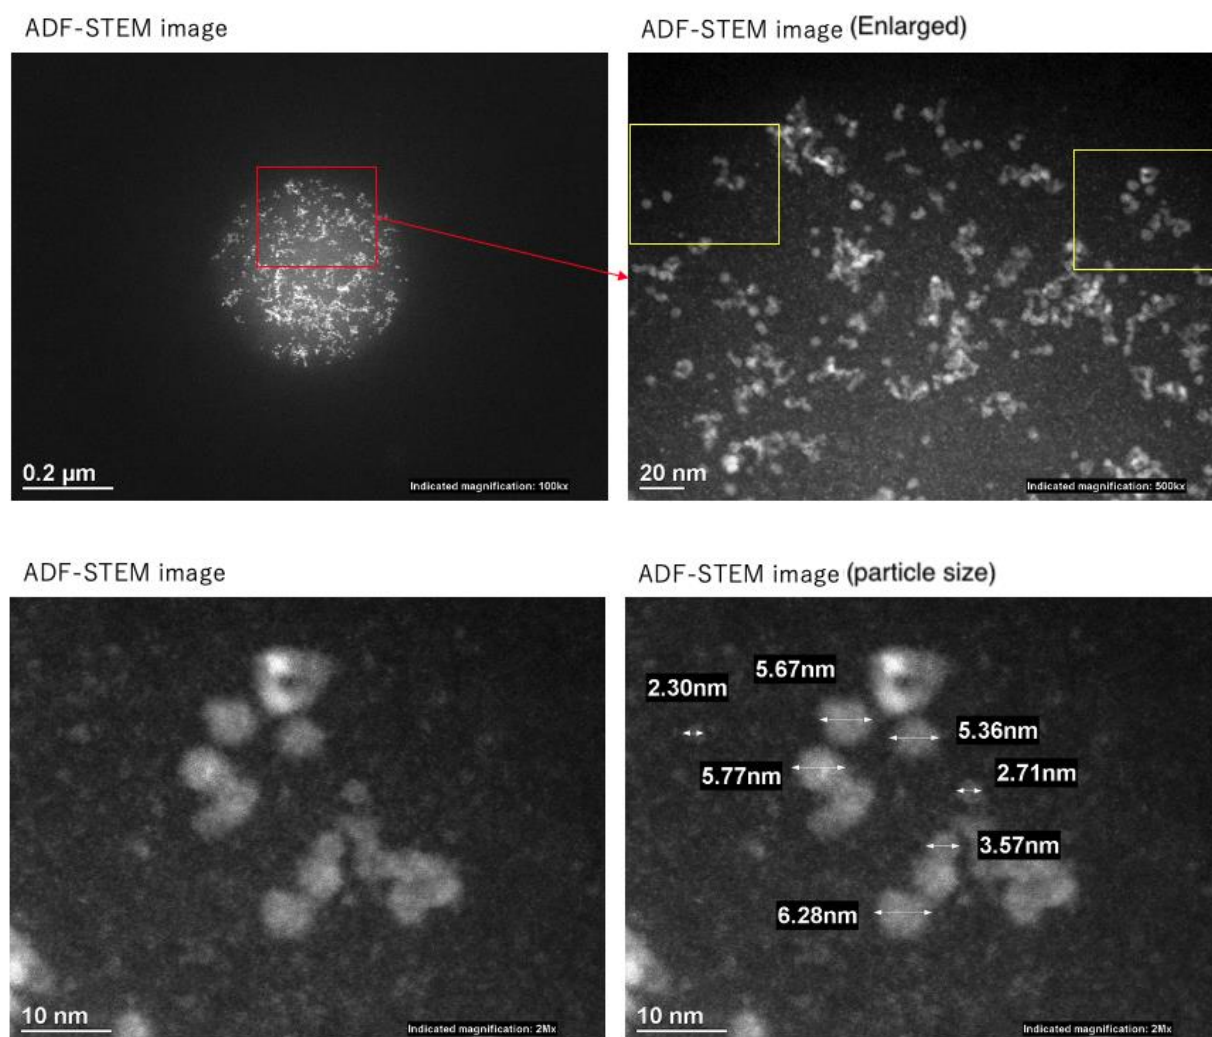

### EDX spectrum for part 1-3

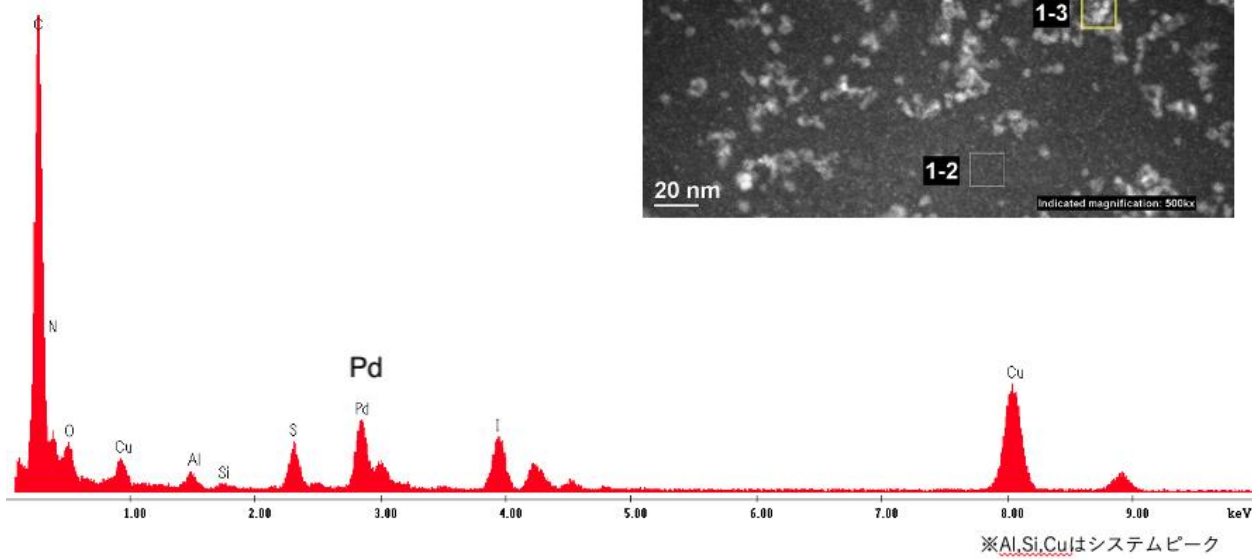

### 3-6-2. Suzuki-Miyaura reaction

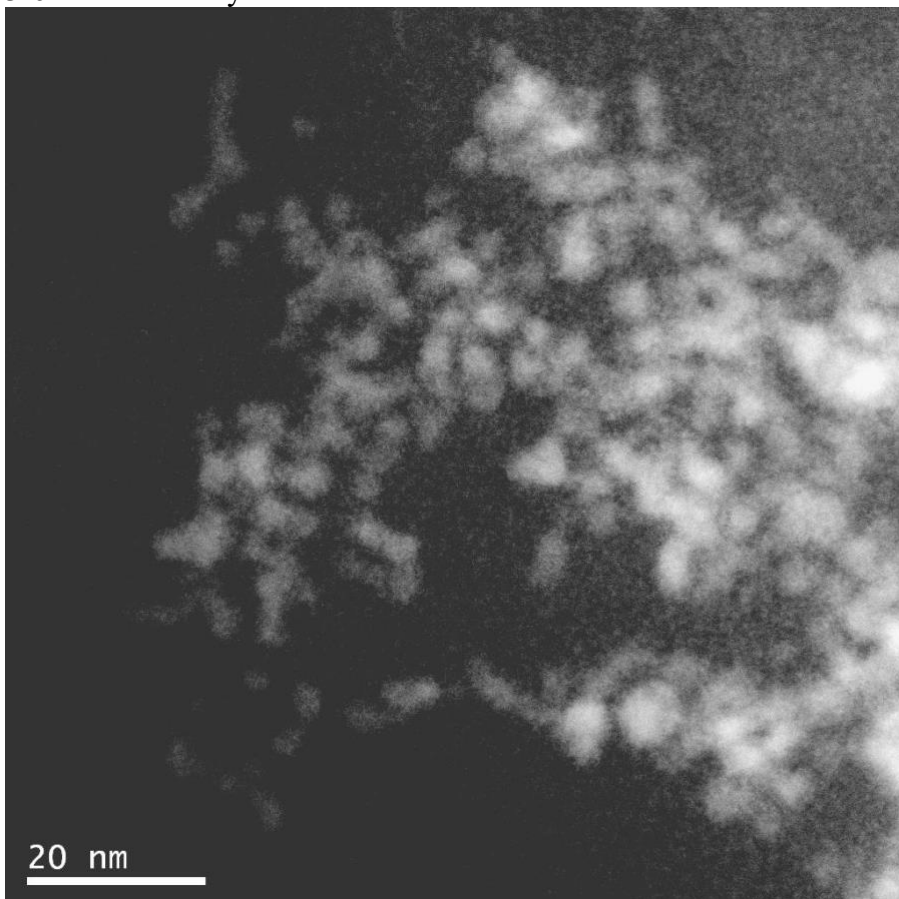

Project: 20240612

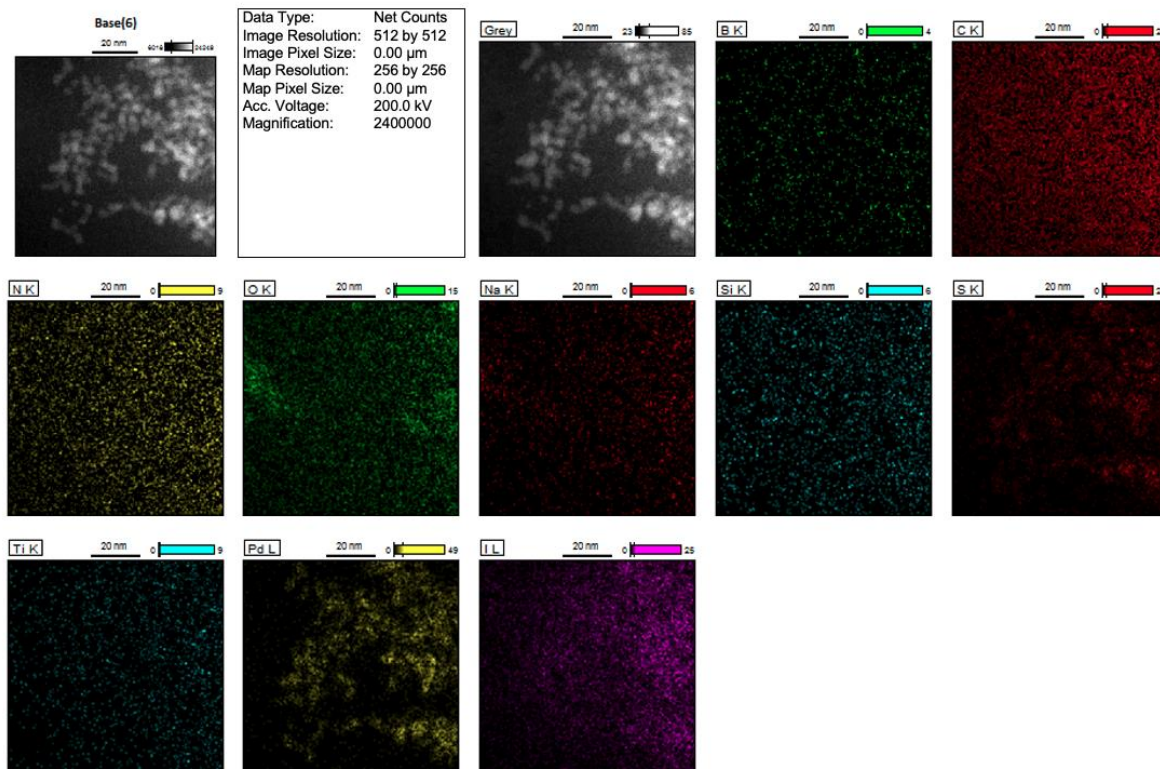

## 4. Spectroscopic data for the catalytic reactions in water.

### 4.1. Mizoroki-Heck reactions in water.

Butyl (*E*)-3-phenylacrylate (**8aa**) <sup>17</sup>

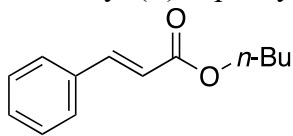

<sup>1</sup>H NMR

(Y >99%, Reaction mixture) ■ : internal standard (mesitylene), ● : the product

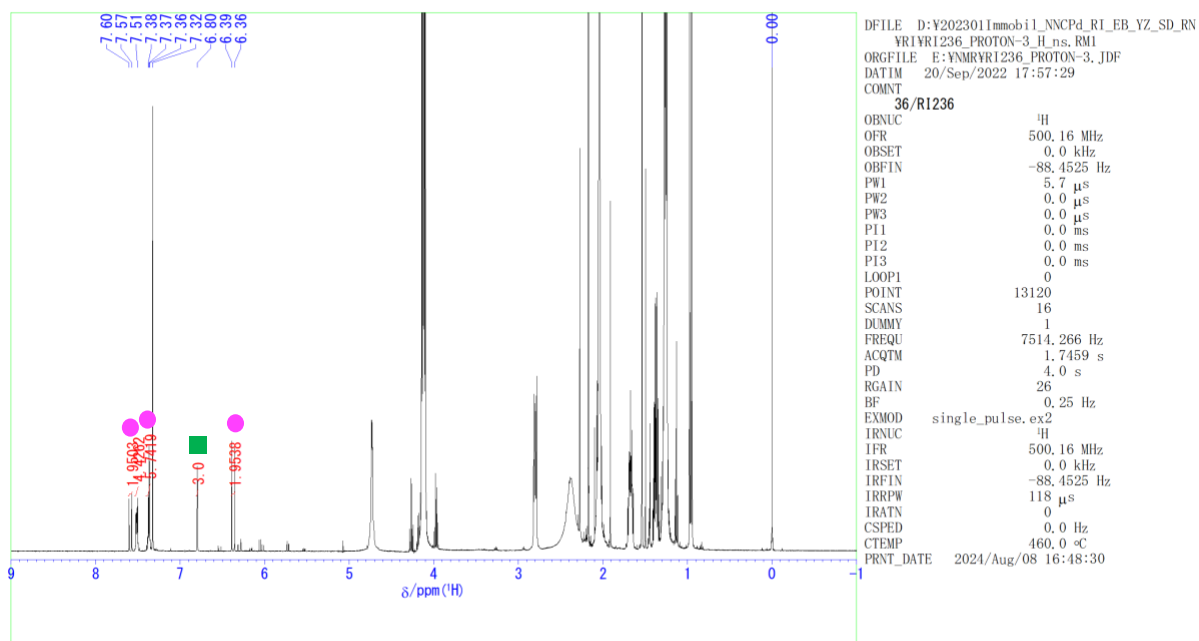

### Butyl (E)-3-(4-acetylphenyl)acrylate (**8ba**)<sup>17</sup>

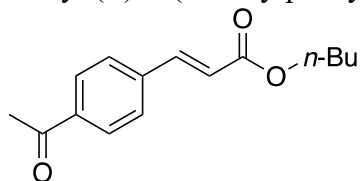

<sup>1</sup>H NMR (Y >99%, reaction mixture) ■ : internal standard (mesitylene), ● : the product

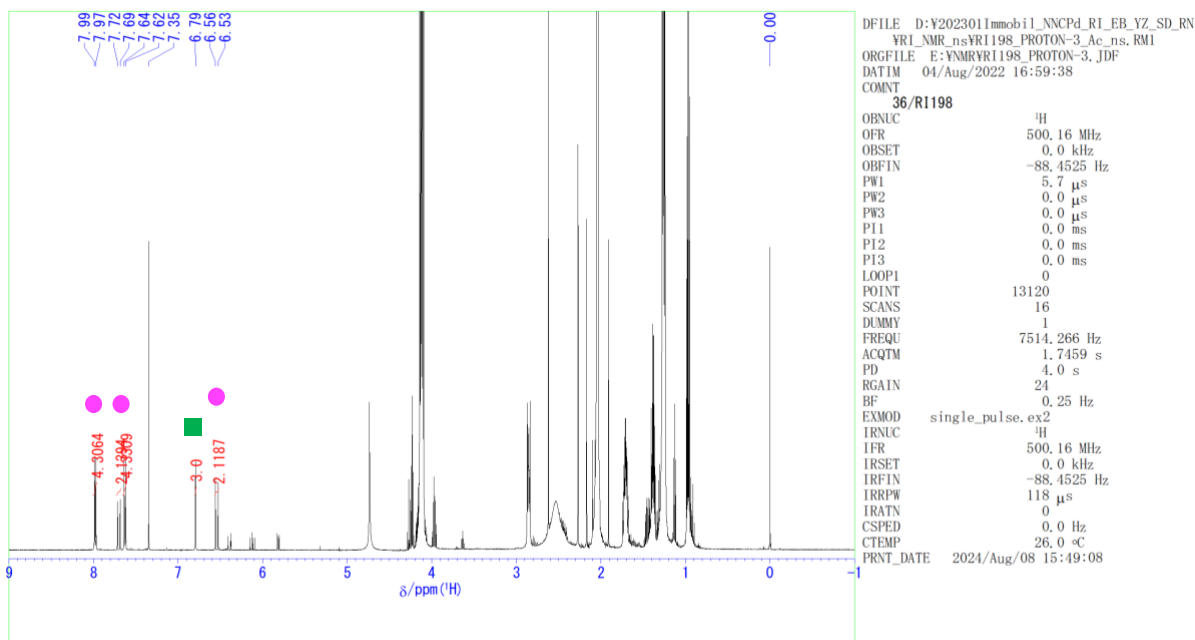

Isolated (ethyl acetate is contained).

<sup>1</sup>H NMR (CDCl<sub>3</sub>, Me<sub>4</sub>Si, 500 MHz): δ = 0.97 (t, 3H, J = 7.3 Hz, CH<sub>3</sub>), 1.40-1.49 (m, 2H, CH<sub>2</sub>), 1.66-1.74 (m, 2H, CH<sub>2</sub>), 2.62 (s, 3H, CH<sub>3</sub>), 4.23 (t, 2H, J = 6.7 Hz, OCH<sub>2</sub>), 6.54 (d, 1H, J = 16 Hz, CH), 7.61 (d, 2H, J = 8.2 Hz), 7.70 (d, 1H, J = 16 Hz, CH), 7.97 (d, 2H, J = 8.6 Hz).

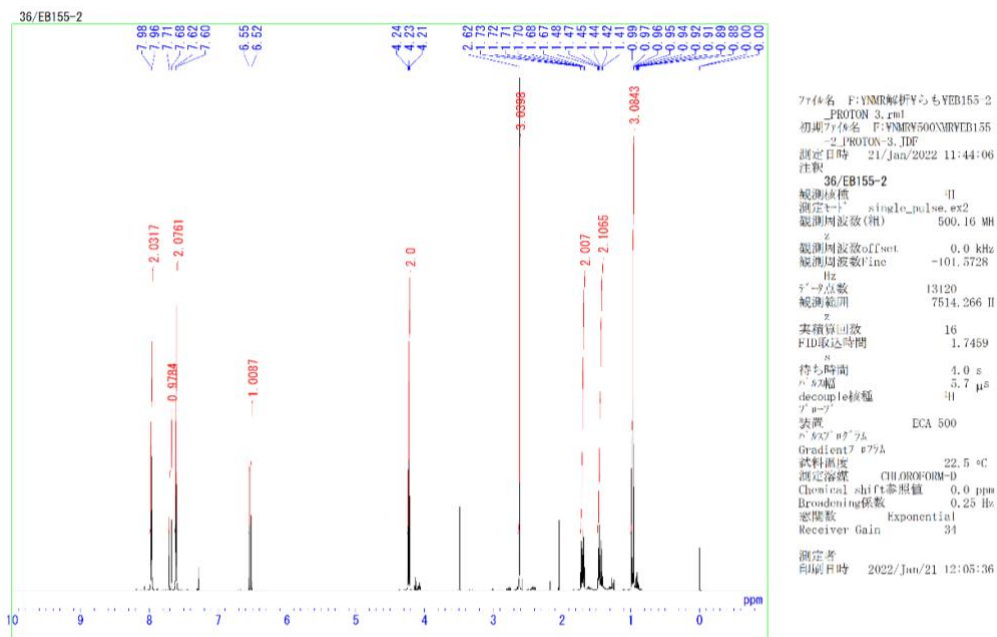



Butyl (E)-3-(4-methoxyphenyl)acrylate (**8ca**) 17

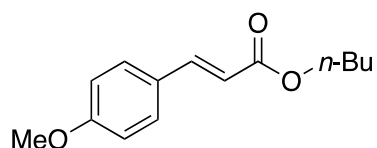

<sup>1</sup>H NMR

(Y >99%, reaction mixture) ■ : internal standard (pyrene), ● : the product

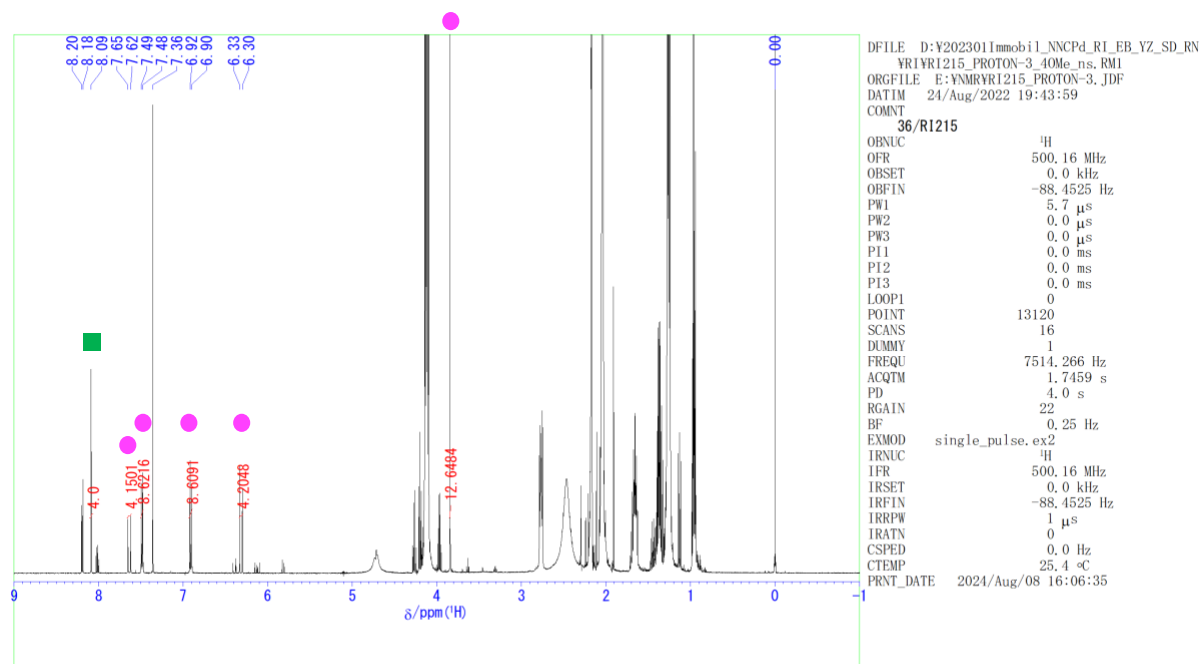

Butyl (E)-3-(4-methylphenyl)acrylate (**8ea**) 17

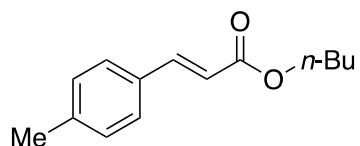

<sup>1</sup>H NMR

(Y >99%, reaction mixture) ■ : internal standard (mesitylene), ● : the product

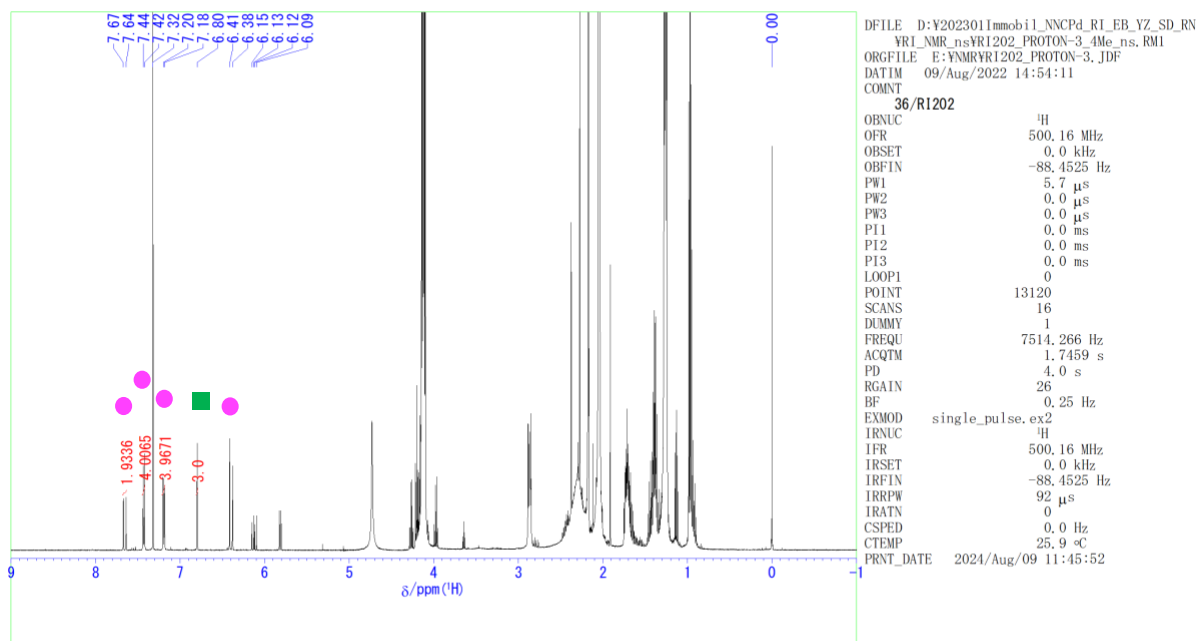



Butyl (E)-3-(2-methylphenyl)acrylate (**8ia**)<sup>1</sup>

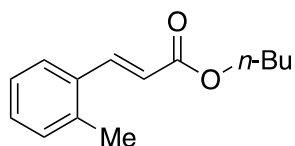

<sup>1</sup>H NMR

(Y 50%, reaction mixture) ■ : internal standard (mesitylene), ● : the product, ● starting materials

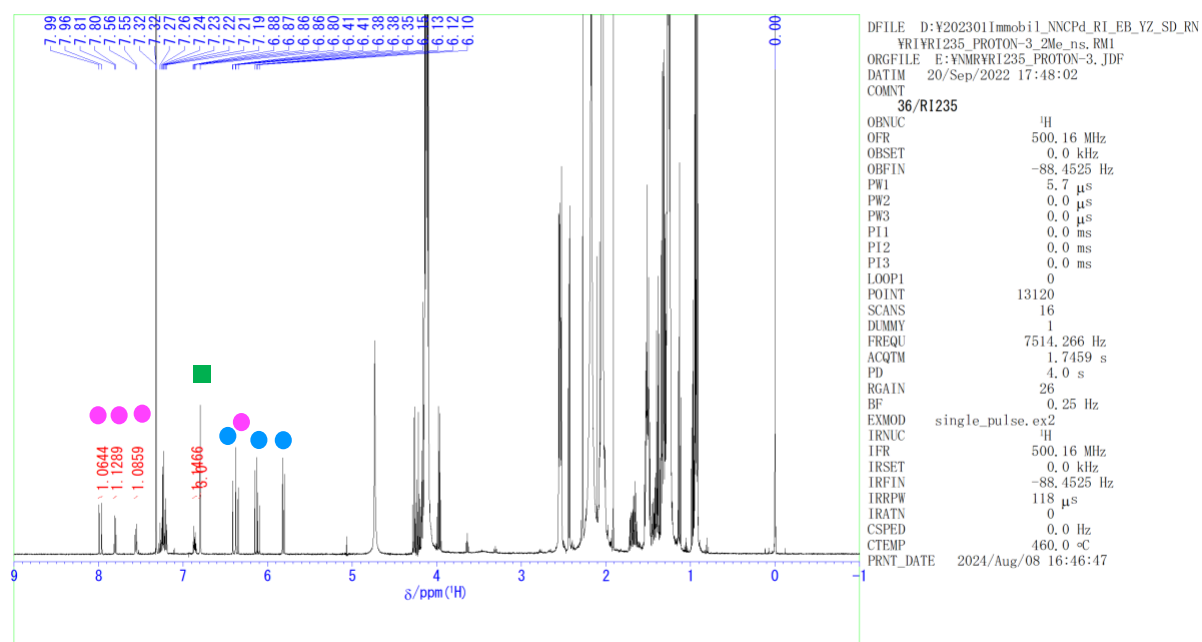

*n*-Butyl (*E*)-3-(4-trifluoromethylphenyl)acrylate (**8ga**)<sup>17</sup>

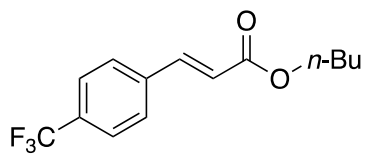

<sup>1</sup>H NMR

(Y >99%, reaction mixture) ■ : internal standard (mesitylene), ● : the product

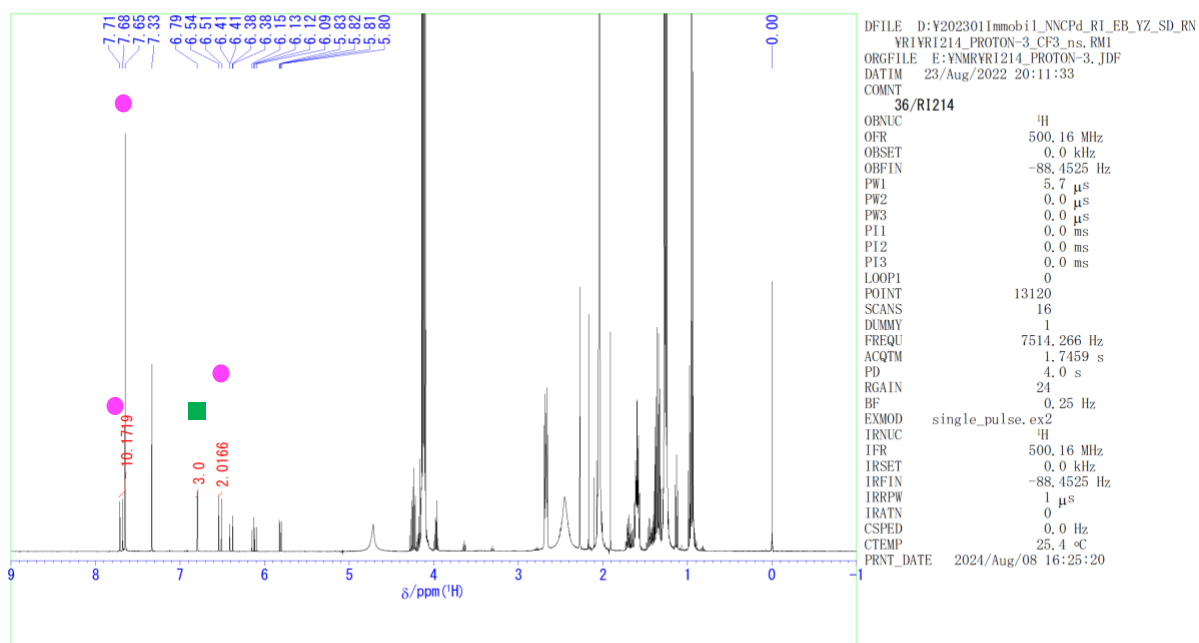

*n*-Butyl (*E*)-3-(4-nitrophenyl)acrylate (**8pa**)<sup>17</sup>

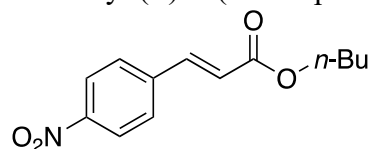

<sup>1</sup>H NMR

(Y 97%, reaction mixture) ■ : internal standard (mesitylene), ● : the product

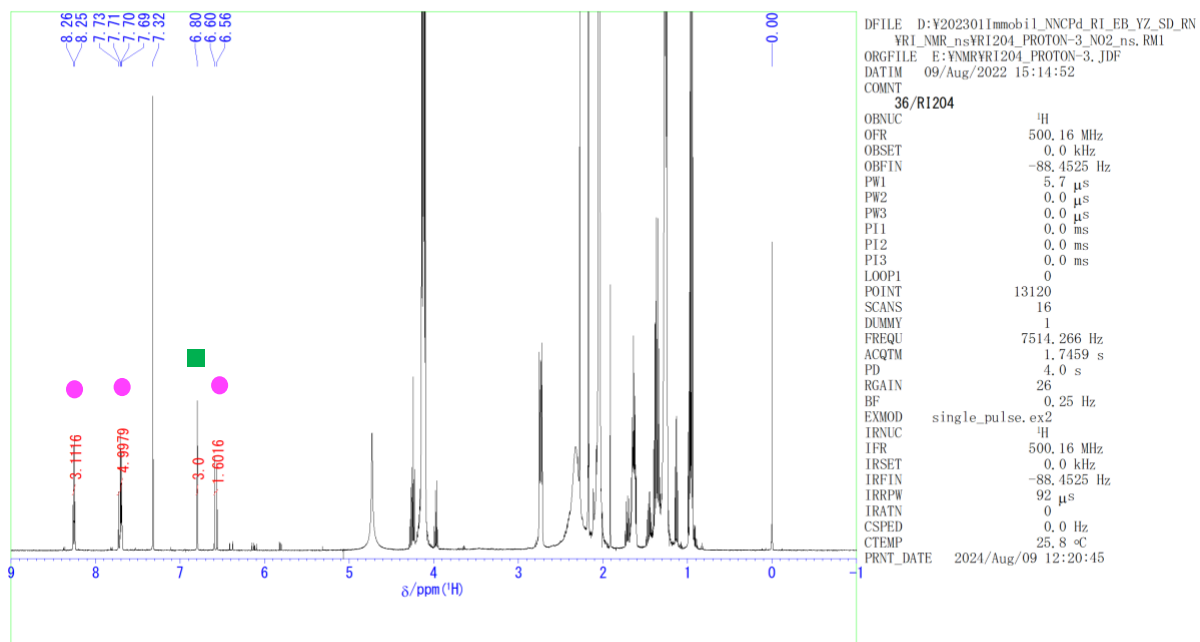

*n*-Butyl (*E*)-3-(1-naphthyl)acrylate (**8qa**)<sup>1</sup>

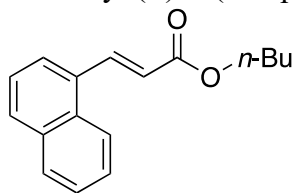

(Y >99%, reaction mixture)    ■ : internal standard (mesitylene), ● : the product

<sup>1</sup>H NMR

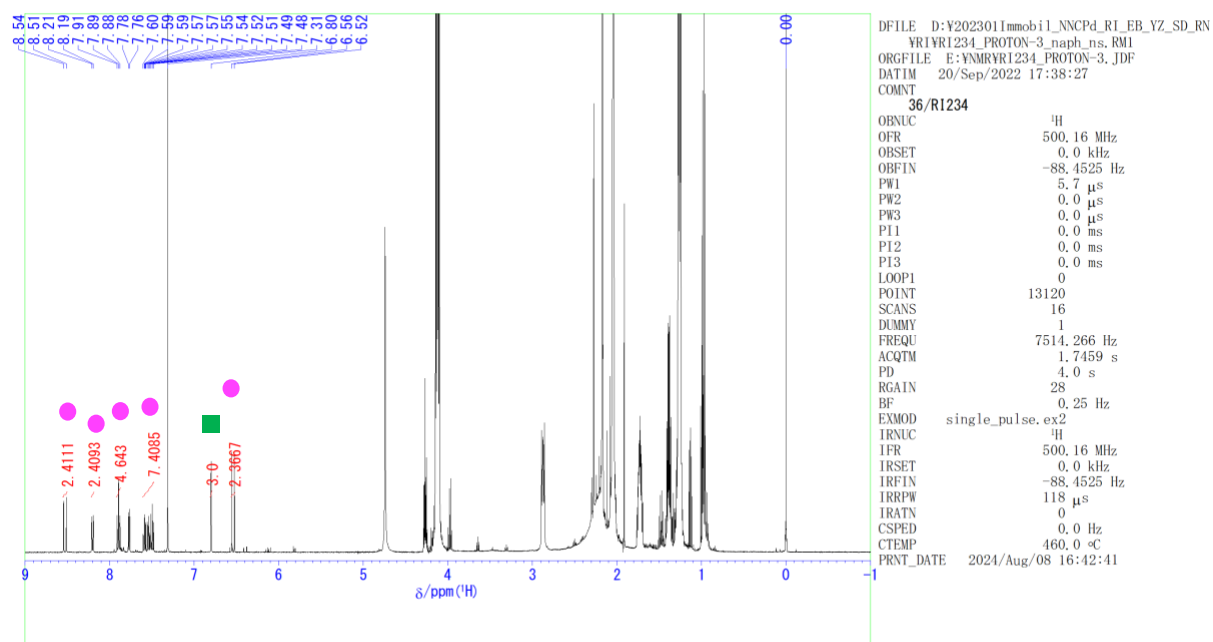

*tert*-Butyl (*E*)-3-phenylacrylate (**8ac**)<sup>1</sup>

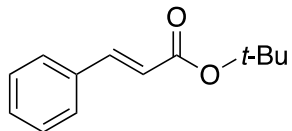

<sup>1</sup>H NMR

(Y >99%, reaction mixture) ■ : internal standard (mesitylene), ● : the product

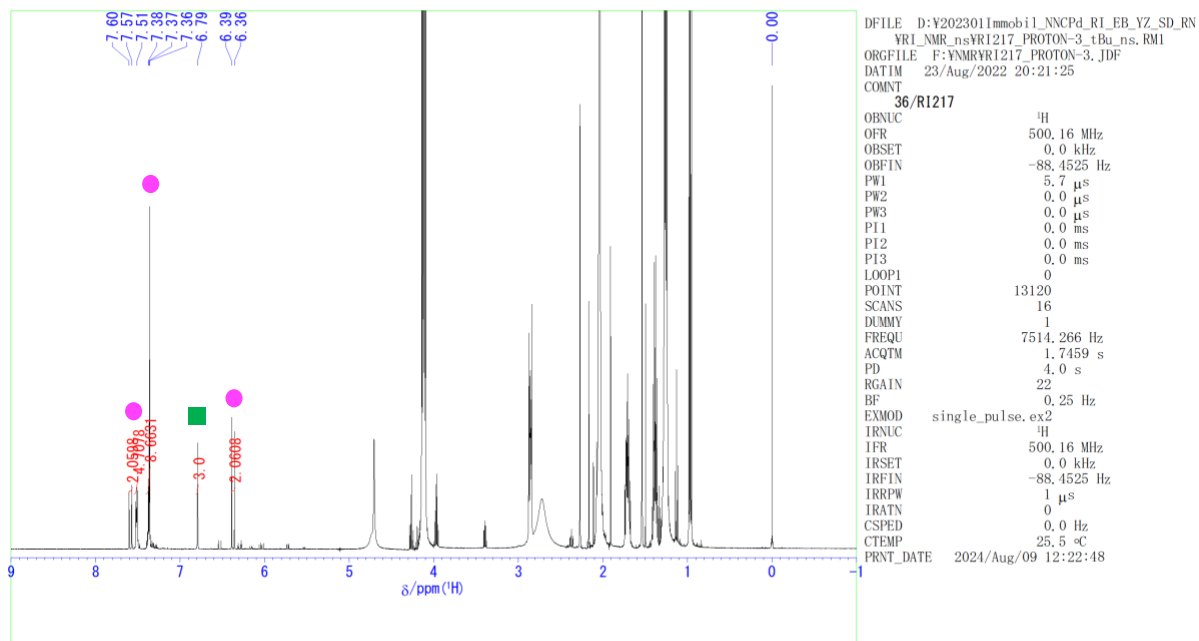

*N*-Isopropyl (*E*)-3-phenylacrylamide (**8ad**)<sup>17</sup>

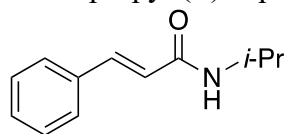

<sup>1</sup>H NMR

(Y >99%, reaction mixture) ■ : internal standard (mesitylene), ● : the product

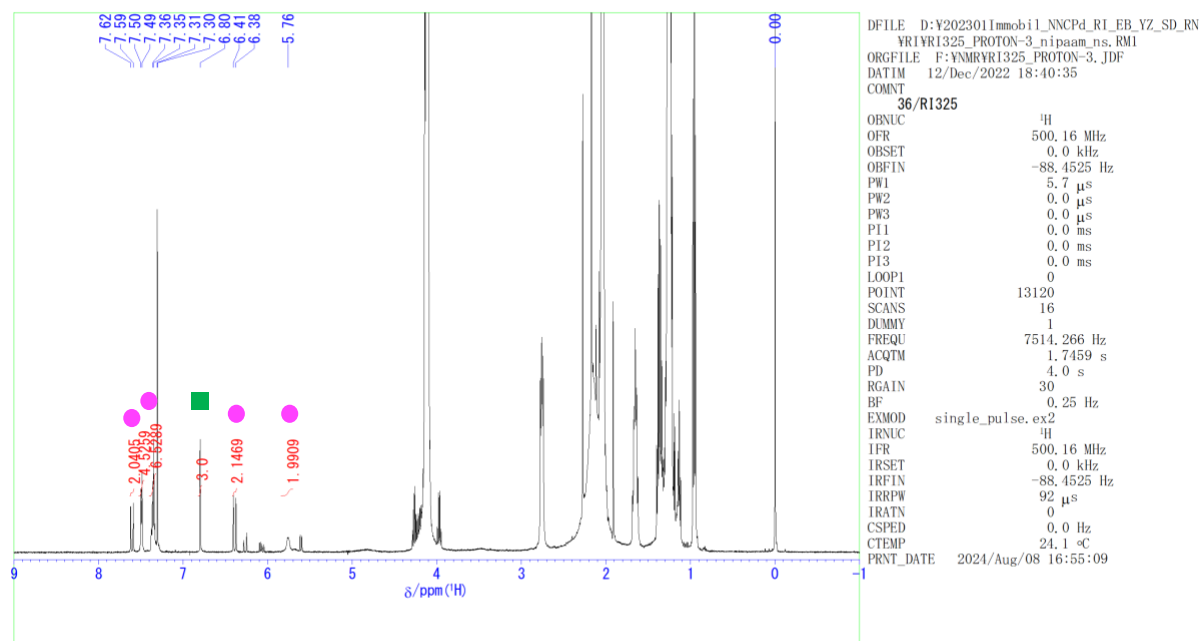

(E)-Stilbene (**8ab**)<sup>17</sup>

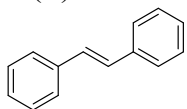

<sup>1</sup>H NMR

(Y 34%, reaction mixture) ■ : internal standard (pyrene), ● : the product, ● starting materials

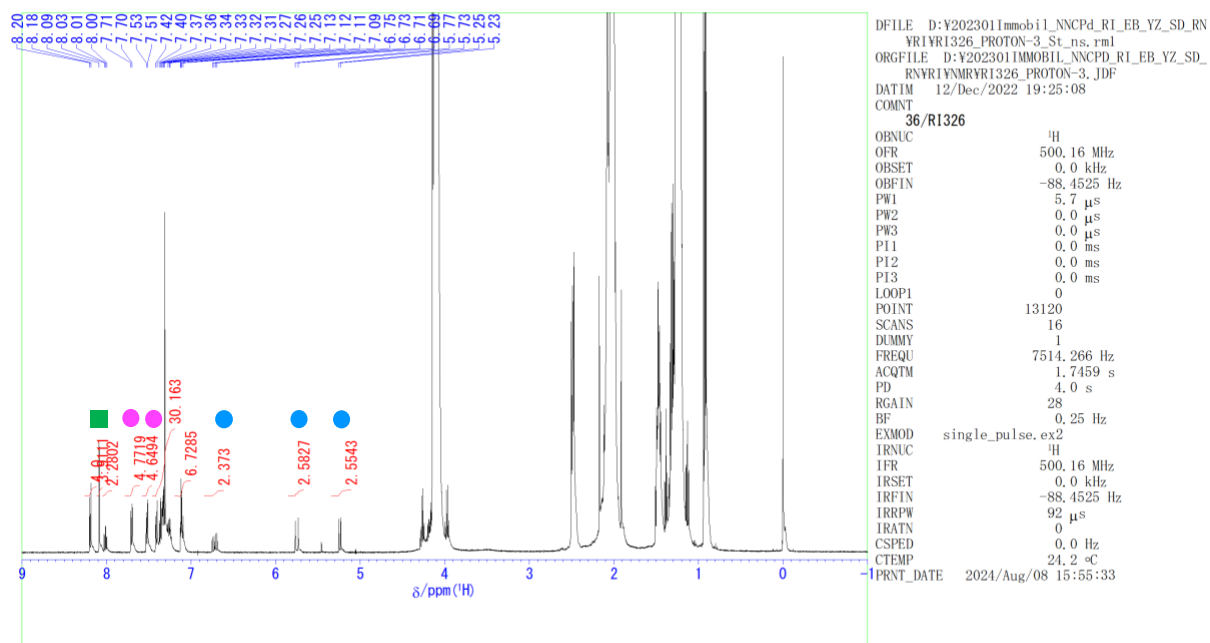

## 4.2. Suzuki-Miyaura cross coupling reactions in water.

### 4-Methoxybiphenyl (**10ab**)<sup>18, 19</sup>

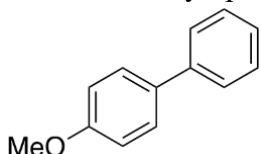

<sup>1</sup>H NMR (isolated)

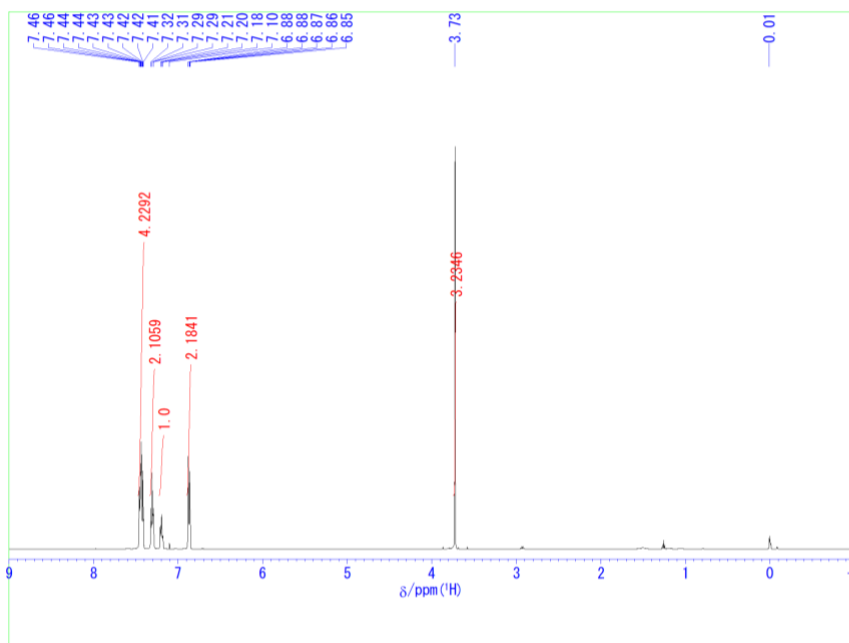

```

DFILE D:\Y2023011mmobi1_NNCpd_R1_EB_YZ_SD_RN
YCRYSM生成物NMR\YCR157-CLEAN_PROTON-3_MeO
.s, RM1
ORGFIL E:\YVMRYCR157-CLEAN_PROTON-3_JDF
DATIM 27/Jun/2024 12:44:10
COMT
36/CR157-clean
OBNUC 1H
OFR 500.16 MHz
OBSET 0.0 kHz
OBFIN -88.4525 Hz
PW1 5.7 us
PW2 0.0 us
PW3 0.0 us
PI1 0.0 ms
PI2 0.0 ms
PI3 0.0 ms
LOOP1 0
POINT 13120
SCANS 16
DUMMY 1
FREQU 7514.266 Hz
ACQTM 1.7459 s
PD 4.0 s
RGAIN 30
BF 0.25 Hz
EXMOD single_pulse_ex2
IRNUC 1H
IFR 500.16 MHz
IRSET 0.0 kHz
IRFIN -88.4525 Hz
IRRPW 92 us
IRATN 0
CSPED 0.0 Hz
CTEMP 26.1 cC
PRNT_DATE 2024/Aug/08 13:08:55
    
```

<sup>13</sup>C{<sup>1</sup>H} NMR

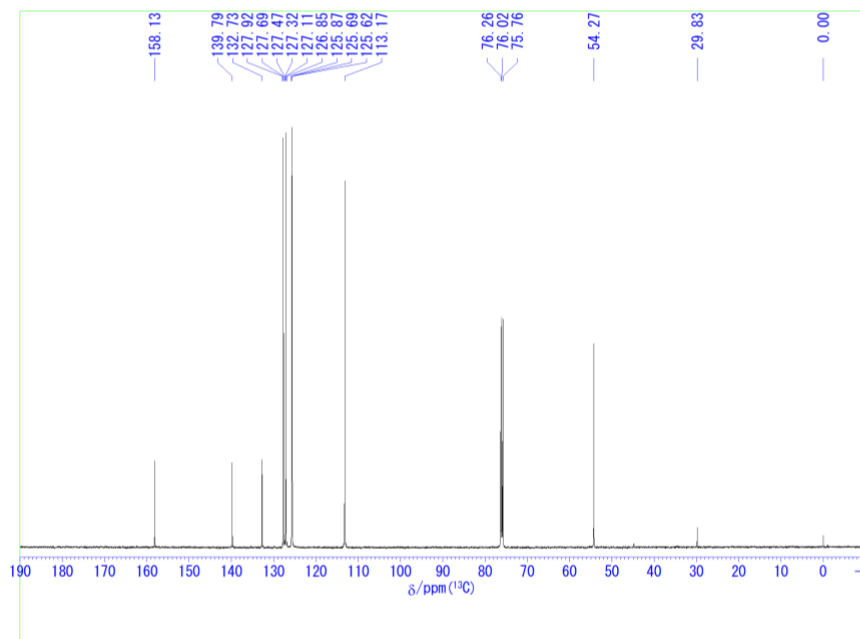

```

DFILE D:\Y2023011mmobi1_NNCpd_R1_EB_YZ_SD_RN
YCRYSM生成物NMR\YCR157-CARBON-3_RM1_OMe_n
.s, RM1
ORGFIL E:\YVMRYCR157-CARBON-3_JDF
DATIM 28/Jun/2024 19:41:42
COMT
36/CR157
OBNUC 13C
OFR 125.77 MHz
OBSET -5.0 kHz
OBFIN 325.4197 Hz
PW1 4.1917 us
PW2 0.0 us
PW3 0.0 us
PI1 0.0 ms
PI2 0.0 ms
PI3 0.0 ms
LOOP1 0
POINT 26224
SCANS 1024
DUMMY 4
FREQU 31456.86 Hz
ACQTM 0.8336 s
PD 2.0 s
RGAIN 56
BF 0.25 Hz
EXMOD single_pulse_dec
IRNUC 1H
IFR 500.16 MHz
IRSET 0.0 kHz
IRFIN -88.4525 Hz
IRRPW 92 us
IRATN 0
CSPED 0.0 Hz
CTEMP 25.2 cC
PRNT_DATE 2024/Aug/08 13:10:46
    
```



4-Methoxybiphenyl (**10ac**)<sup>18, 19</sup>

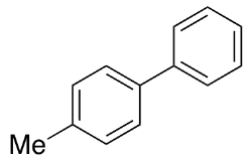

98% by <sup>1</sup>H NMR isolated 56%

<sup>1</sup>H NMR

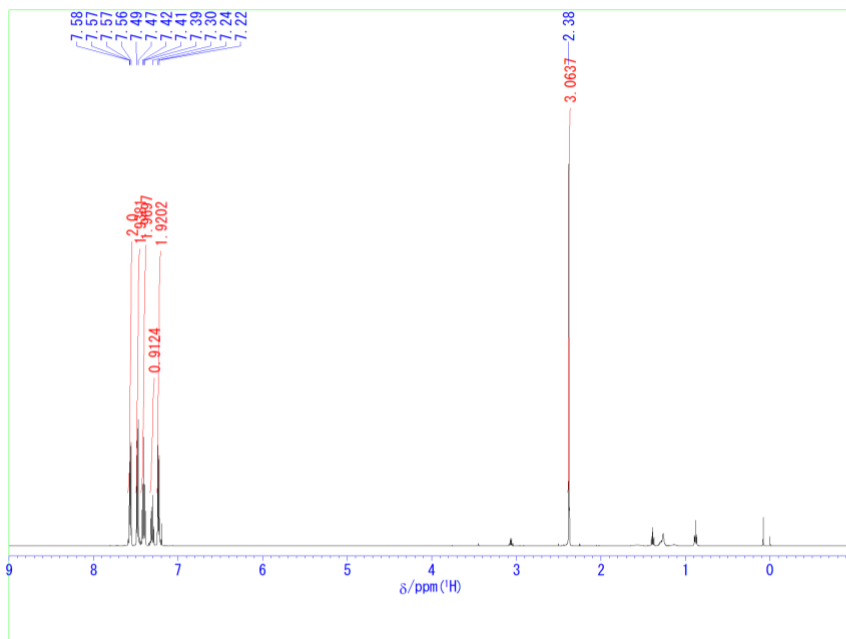

```

DFILE D:\Y202301\Immobil_NNCPd_RI_EB_YZ_SD_RN
YCRYSM生成物\NMR\CR175-3_PROTON-3_Me_ns.R
M1
ORGFIL E:\Y202301\Immobil_NNCPd_RI_EB_YZ_SD_RN
DATIM 24/May/2024 16:54:44
COMNT
36/CR175-3
OBNUC 1H
OFR 500.16 MHz
OBSET 0.0 kHz
OBFIN -82.7305 Hz
PW1 5.7 μs
PW2 0.0 μs
PW3 0.0 μs
P11 0.0 ms
P12 0.0 ms
P13 0.0 ms
LOOP1 0
POINT 13120
SCANS 16
DUMMY 1
FREQU 7514.266 Hz
ACQTM 1.7459 s
PD 4.0 s
RGAIN 32
BF 0.25 Hz
EXMOD single_pulse_ex2
IRNUC 1H
IFR 500.16 MHz
IRSET 0.0 kHz
IRFIN -88.4525 Hz
IRRPW 92 μs
IRATN 0
CSPED 0.0 Hz
CTEMP 25.6 °C
PRNT_DATE 2024/Aug/08 13:20:51
    
```

<sup>13</sup>C{<sup>1</sup>H} NMR

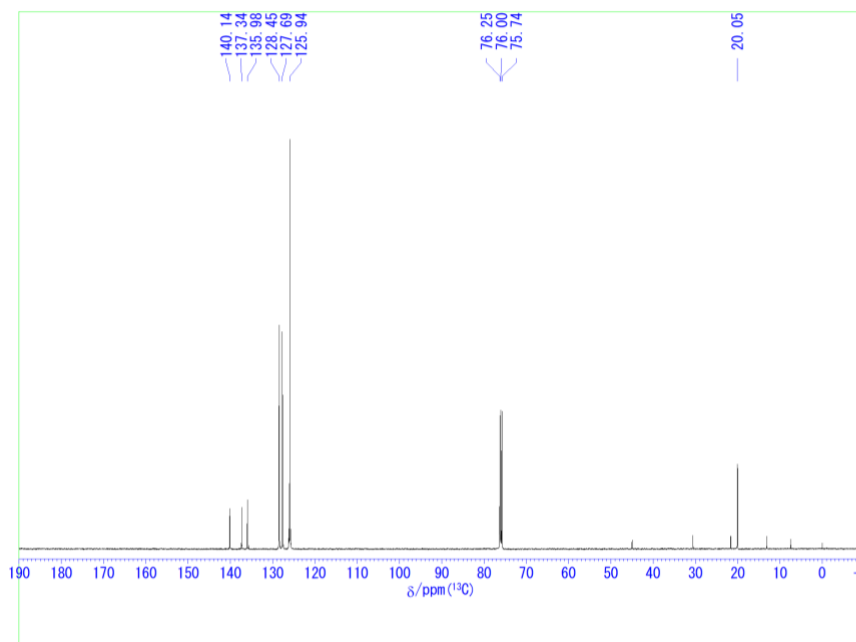

```

DFILE D:\Y202301\Immobil_NNCPd_RI_EB_YZ_SD_RN
YCRYSM生成物\NMR\CR175-CARBON_CARBON-3_Me
_ns.RM1
ORGFIL E:\Y202301\Immobil_NNCPd_RI_EB_YZ_SD_RN
DATIM 24/May/2024 19:39:57
COMNT
36/CR175-carbon
OBNUC 13C
OFR 125.77 MHz
OBSET -5.0 kHz
OBFIN 321.8213 Hz
PW1 4.1917 μs
PW2 0.0 μs
PW3 0.0 μs
P11 0.0 ms
P12 0.0 ms
P13 0.0 ms
LOOP1 0
POINT 26224
SCANS 1024
DUMMY 4
FREQU 31456.86 Hz
ACQTM 0.8336 s
PD 2.0 s
RGAIN 52
BF 0.25 Hz
EXMOD single_pulse_dec
IRNUC 1H
IFR 500.16 MHz
IRSET 0.0 kHz
IRFIN -88.4525 Hz
IRRPW 92 μs
IRATN 0
CSPED 0.0 Hz
CTEMP 25.6 °C
PRNT_DATE 2024/Aug/08 13:22:12
    
```

4-Methylsulfanylbiphenyl (**10ad**)<sup>19</sup>

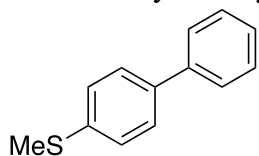

89% by <sup>1</sup>H NMR  
<sup>1</sup>H NMR (isolated)

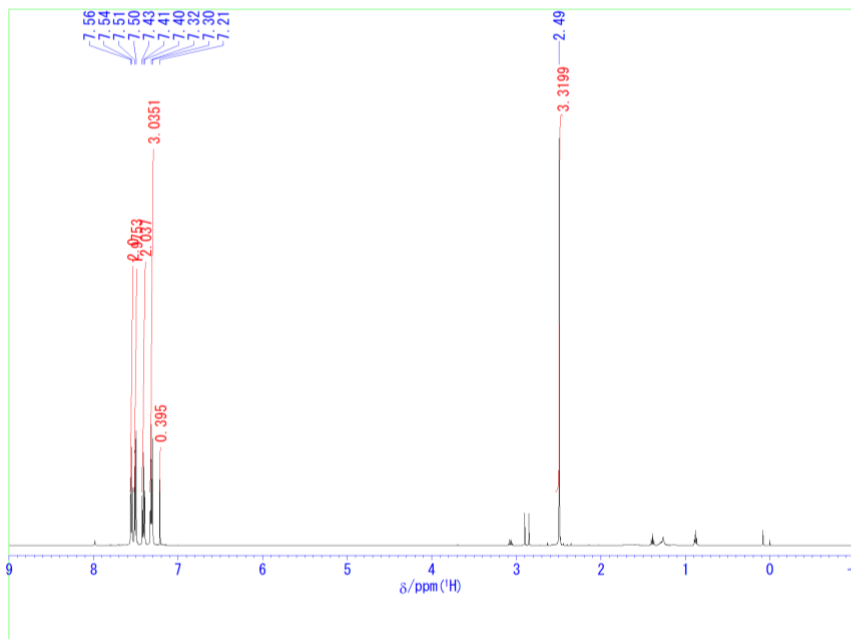

```

D:\Y2023011mmob11_NNCPd_R1_EB_YZ_SD_RN
YCRYSM生成物NMRYCR187-CLEAN_PROTON-3.rml
ORGFILE E:YMMRYCR187-CLEAN_PROTON-3.JDF
DATIM 03/Jul/2024 14:54:38
COMNT
36/CR187-clean
OBNUC 1H
OFR 500.16 MHz
OBSET 0.0 kHz
OBFIN -82.7305 Hz
PW1 5.7 μs
PW2 0.0 μs
PW3 0.0 μs
PI1 0.0 ms
PI2 0.0 ms
PI3 0.0 ms
LOOP1 0
POINT 13120
SCANS 16
DUMMY 1
FREQU 7514.266 Hz
ACQTM 1.7459 s
PD 4.0 s
RGAIN 32
BF 0.25 Hz
EXMOD single_pulse.ex2
IRNUC 1H
IFR 500.16 MHz
IRSET 0.0 kHz
IRFIN -88.4525 Hz
IRRPW 92 μs
IRATN 0
CSPED 0.0 Hz
CTEMP 26.0 °C
PRNT_DATE 2024/Aug/08 13:24:56
    
```

<sup>13</sup>C{<sup>1</sup>H} NMR

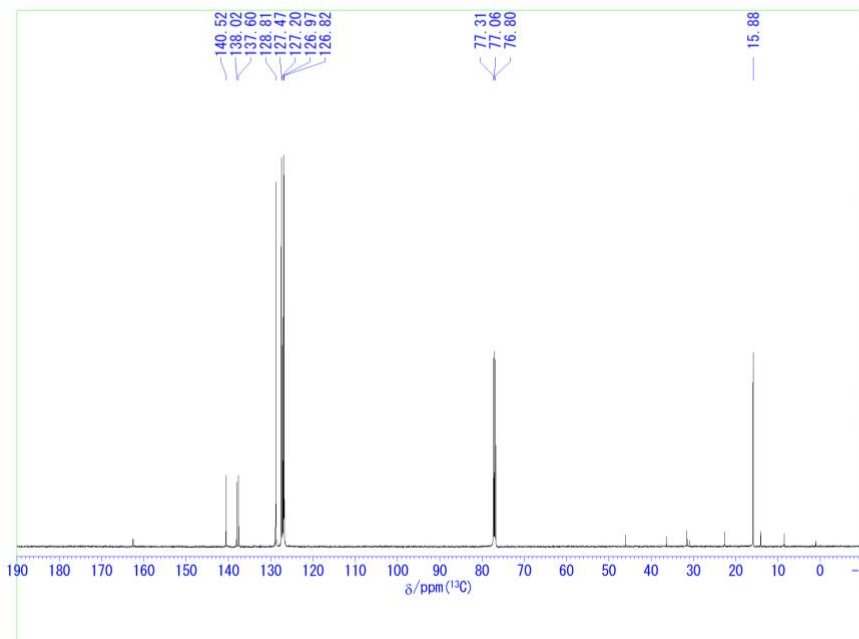

```

D:\Y2023011mmob11_NNCPd_R1_EB_YZ_SD_RN
YCRYSM生成物NMRYCR187-CARBON-3_SMe_ns.RM
1
ORGFILE E:YMMRYCR187-CARBON-3.JDF
DATIM 03/Jul/2024 16:29:39
COMNT
36/CR187
OBNUC 13C
OFR 125.77 MHz
OBSET -5.0 kHz
OBFIN 324.2202 Hz
PW1 4.1917 μs
PW2 0.0 μs
PW3 0.0 μs
PI1 0.0 ms
PI2 0.0 ms
PI3 0.0 ms
LOOP1 0
POINT 26224
SCANS 1024
DUMMY 4
FREQU 31456.86 Hz
ACQTM 0.8336 s
PD 2.0 s
RGAIN 52
BF 0.25 Hz
EXMOD single_pulse_dec
IRNUC 1H
IFR 500.16 MHz
IRSET 0.0 kHz
IRFIN -88.4525 Hz
IRRPW 92 μs
IRATN 0
CSPED 0.0 Hz
CTEMP 27.1 °C
PRNT_DATE 2024/Aug/08 13:27:18
    
```

4-Acetylbiphenyl (**10ae**)<sup>18, 20</sup>

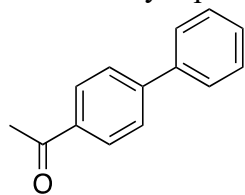

<sup>1</sup>H NMR

(Y 65%, reaction mixture)

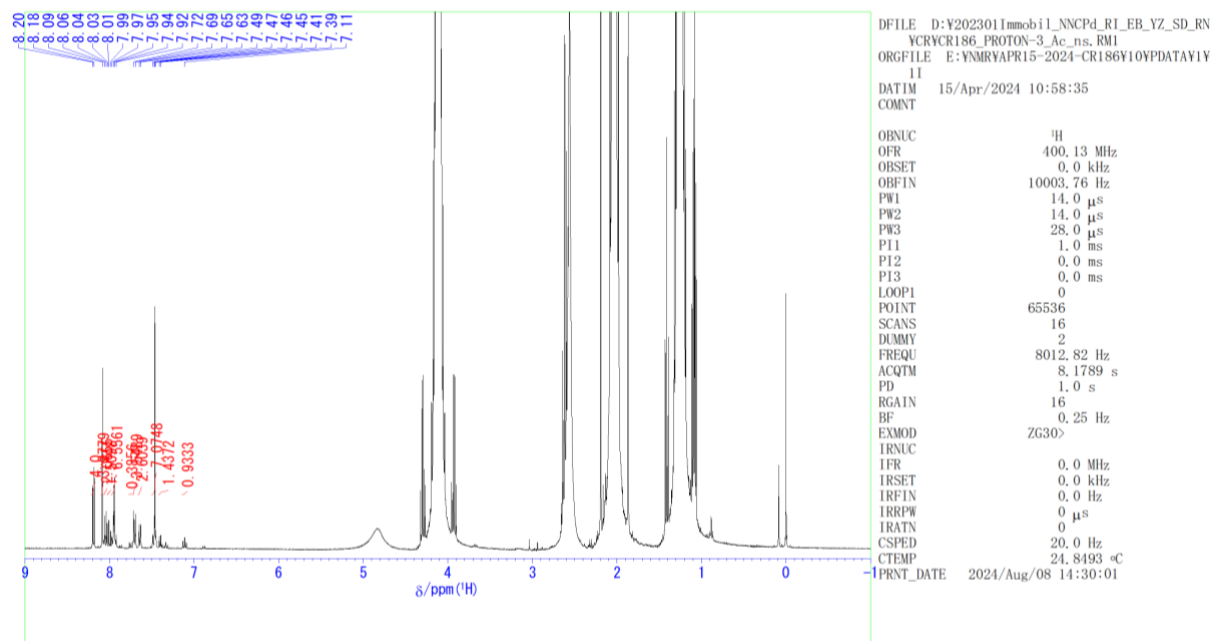

Enlarged ■ : internal standard (pyrene), ● : the product

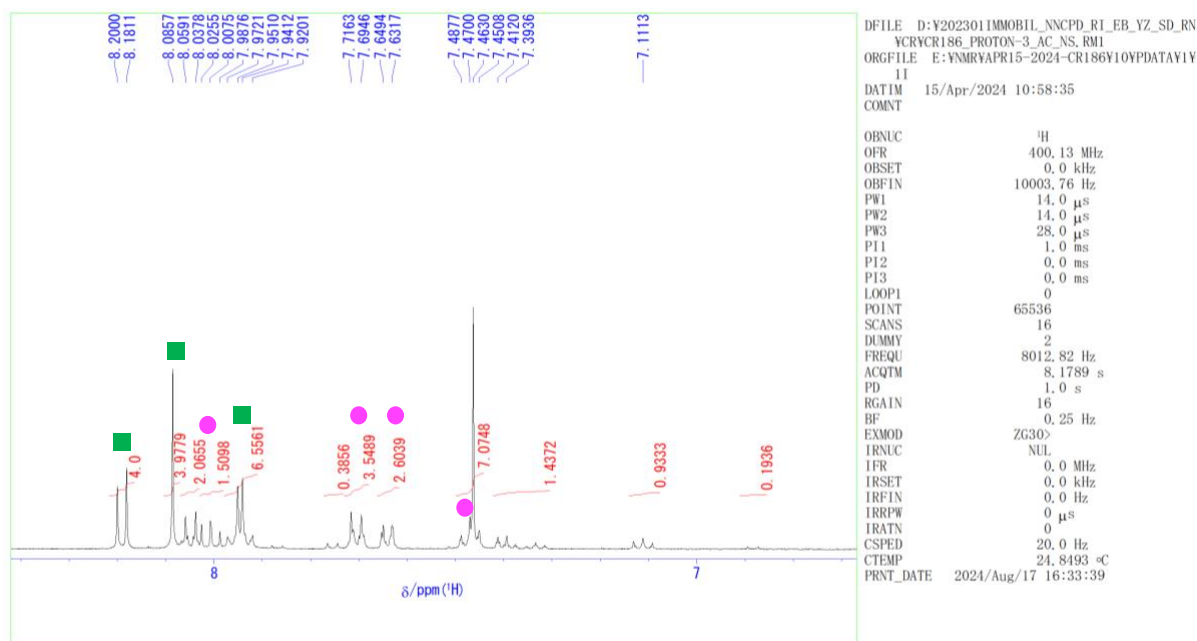



4-Chlorobiphenyl (**10af**)<sup>19</sup>

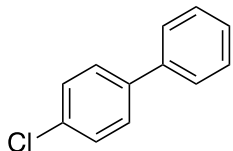

(Y >99%, reaction mixture)

<sup>1</sup>H NMR

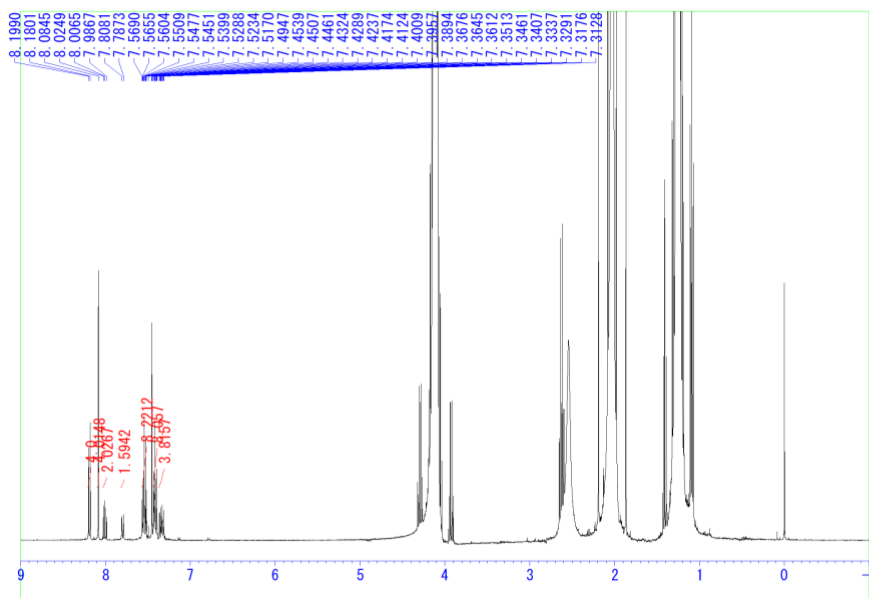

ファイル名 D:\Y2023011\Immobil\_NNCPd\_RI\_EB\_YZ\_SD\_...  
 R\N\CR189\_PROTON-3\_4Cl\_NS.RM1  
 初期ファイル名 E:\NMR\YAPR15-2024-CR189\10VPDAT...  
 AVI\Y11  
 測定日時 15/Apr/2024 14:22:53  
 注釈  
 観測核種 <sup>1</sup>H  
 測定モード ZG30>  
 観測周波数(粗) 400.13 MHz  
 観測周波数offset 0.0 kHz  
 観測周波数Fine 10003.76 Hz  
 ティンク点数 65536  
 観測範囲 8012.82 Hz  
 実積算回数 16  
 FID取込時間 8.1789 s  
 待ち時間 1.0 s  
 パルス幅 14.0 μs  
 decouple核種  
 プログラム Z108618\_0905 (PA BBO 400S1 BBF-H  
 装置 Bruker  
 パルスプログラム ZG30>  
 Gradientプログラム  
 試料温度 24.8499 °C  
 測定溶媒 CDCl<sub>3</sub>>  
 Chemical shift参照値 16.3595 ppm  
 Broadening係数 0.25 Hz  
 窓関数 Exponential  
 Receiver Gain 16  
 測定者  
 印刷日時 2024/Aug/08 14:31:40

Enlarged, ■ : internal standard (pyrene), ● : the product

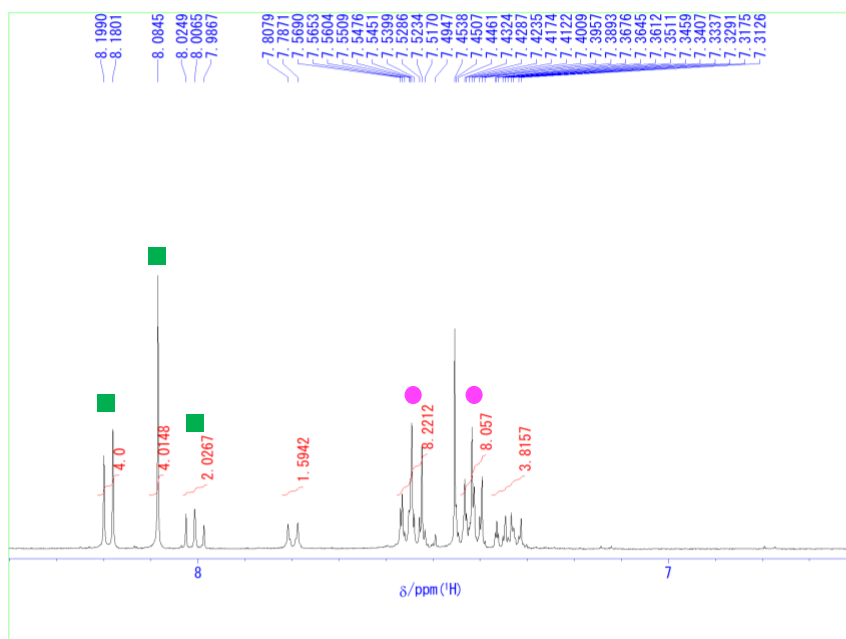

D:\Y2023011\Immobil\_NNCPd\_RI\_EB\_YZ\_SD\_RN...  
 CR189\_PROTON-3\_4Cl\_NS.RM1  
 ORGFILE E:\NMR\YAPR15-2024-CR189\10VPDATA\Y1...  
 I1  
 DATIM 15/Apr/2024 14:22:53  
 COMNT  
 OBNUC <sup>1</sup>H  
 OFR 400.13 MHz  
 OBSSET 0.0 kHz  
 OBFIN 10003.76 Hz  
 PW1 14.0 μs  
 PW2 14.0 μs  
 PW3 28.0 μs  
 PT1 1.0 ms  
 PT2 0.0 ms  
 PT3 0.0 ms  
 LOOP1 0  
 POINT 65536  
 SCANS 16  
 DUMMY 2  
 FREQU 8012.82 Hz  
 ACQTM 8.1789 s  
 PD 1.0 s  
 RGAIN 16  
 BF 0.25 Hz  
 EXMOD ZG30>  
 IRNUC NUL  
 IFR 0.0 MHz  
 IRSSET 0.0 kHz  
 IRFIN 0.0 Hz  
 IRRPW 0 μs  
 IRATN 0  
 CSPED 20.0 Hz  
 CTEMP 24.8499 °C  
 PRNT\_DATE 2024/Aug/17 16:45:23

### 3-Methoxybiphenyl (**10ag**)<sup>21</sup>

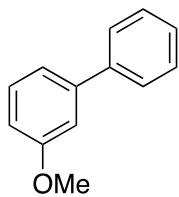

(>99%, reaction mixture)

<sup>1</sup>H NMR

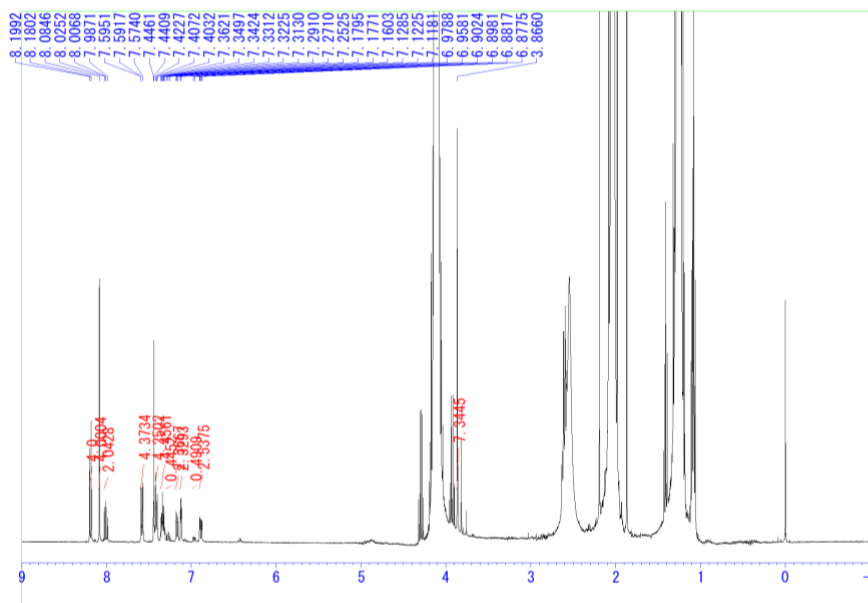

ファイル名 D:\202301\Immobil\_NNCPd\_RI\_EB\_YZ\_SD\_...  
 RNVCRVCR190\_PROTON-3\_30Me\_ns.RM1  
 初期ファイル名 E:\NMR\YAPR15-2024-CR190Y10YDPDAT...  
 AV1Y11  
 測定日時 15/Apr/2024 14:28:46  
 注釈  
 観測核種 <sup>1</sup>H  
 測定モード ZG30>  
 観測周波数(粗) 400.13 MHz  
 観測周波数offset 0.0 kHz  
 観測周波数Fine 10003.76 Hz  
 ティンク点数 65536  
 観測範囲 8012.82 Hz  
 実積算回数 16  
 FID取込時間 8.1789 s  
 待ち時間 1.0 s  
 パルス幅 14.0 μs  
 decouple核種 プロトン Z108618\_0905 (PA BBO 400S1 BBF-H)  
 装置 Bruker  
 パルスプログラム ZG30>  
 Gradientプログラム >  
 試料温度 24.8514 °C  
 測定溶媒 CDCl<sub>3</sub>>  
 Chemical shift参照値 16.3517 ppm  
 Broadening係数 0.25 Hz  
 窓関数 Exponential  
 Receiver Gain 16  
 測定者  
 印刷日時 2024/Aug/08 14:33:50

Enlarged, ■ : internal standard (pyrene), ● : the product

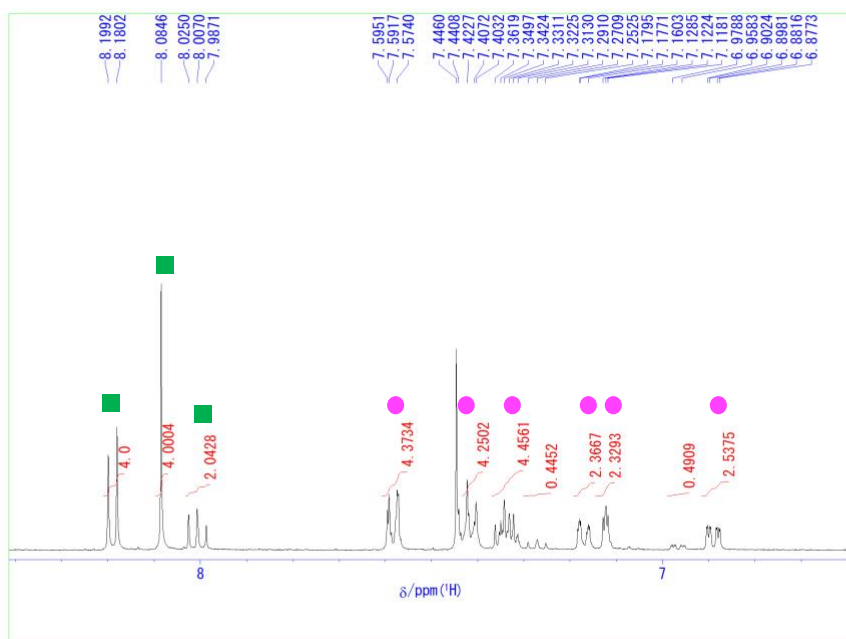

D:\202301\IMMOBIL\_NNCPD\_RI\_EB\_YZ\_SD\_RN...  
 YCRVCR190\_PROTON-3\_30ME\_NS.RM1  
 ORGFILE E:\NMR\YAPR15-2024-CR190Y10YDPDATA\Y1...  
 11  
 DATIM 15/Apr/2024 14:28:46  
 COMNT  
 OBNUC <sup>1</sup>H  
 OFR 400.13 MHz  
 OBSET 0.0 kHz  
 OBFIN 10003.76 Hz  
 PW1 14.0 μs  
 PW2 14.0 μs  
 PW3 28.0 μs  
 P11 1.0 ms  
 P12 0.0 ms  
 P13 0.0 ms  
 LOOP1 0  
 POINT 65536  
 SCANS 16  
 DUMMY 2  
 DUMBY 2  
 FREQU 8012.82 Hz  
 ACQTM 8.1789 s  
 PD 1.0 s  
 RGAIN 16  
 BF 0.25 Hz  
 EXMOD ZG30>  
 IRNUC NULL  
 IFR 0.0 MHz  
 IRSET 0.0 kHz  
 IRFIN 0.0 Hz  
 IRRPW 0 μs  
 IRATN 0  
 CSPED 20.0 Hz  
 CTEMP 24.8514 °C  
 PRNT\_DATE 2024/Aug/17 16:55:25

# 4-Hydroxybiphenyl (10da)<sup>22</sup>

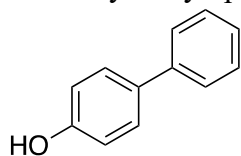

Isolated 97%

<sup>1</sup>H NMR

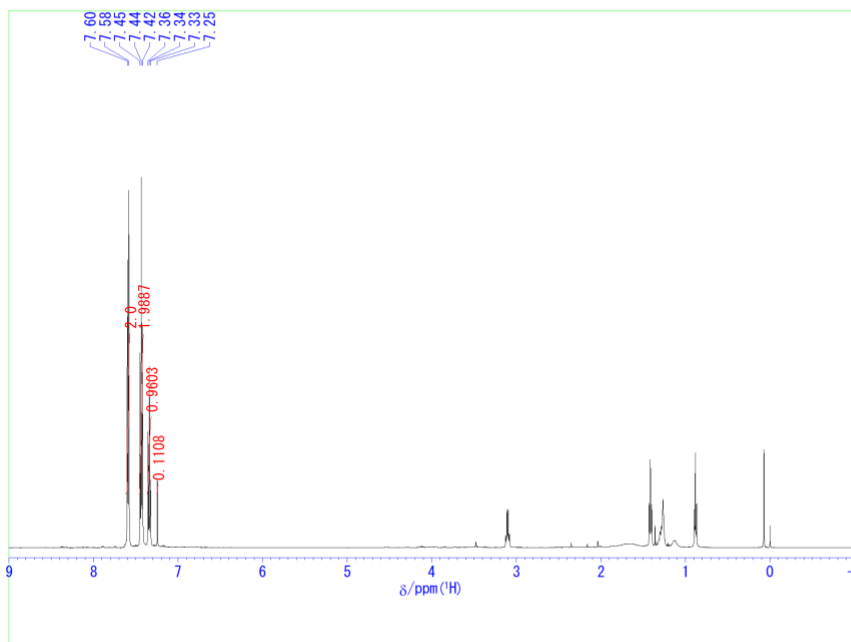

D:\Y202301\Immobil\_NNCPd\_RI\_EB\_YZ\_SD\_RN  
YCRYCR171-1\_PROTON-3\_OH\_ns.RM1  
ORGF1LE E:\YMR\YCR171-1\_PROTON-3\_JDF  
DATIM 01/Aug/2024 11:44:45  
COMNT  
36/CR171-1  
OBNUC <sup>1</sup>H  
OFR 500.16 MHz  
OBSET 0.0 kHz  
OBFIN -48.8773 Hz  
PW1 5.7 μs  
PW2 0.0 μs  
PW3 0.0 μs  
PT1 0.0 ms  
PT2 0.0 ms  
PT3 0.0 ms  
LOOP1 0  
POINT 13120  
SCANS 16  
DUMMY 1  
FREQU 7514.266 Hz  
ACQTM 1.7459 s  
PD 4.0 s  
RGAIN 42  
BF 0.25 Hz  
EXMOD single\_pulse.ex2  
IRNUC <sup>1</sup>H  
IFR 500.16 MHz  
IRSET 0.0 kHz  
IRFIN -88.4525 Hz  
IRRPW 92 μs  
IRATN 0  
CSPED 0.0 Hz  
CTEMP 28.0 °C  
PRNT\_DATE 2024/Aug/08 14:10:33

# 4-Aminobiphenyl (10fa)<sup>22</sup>

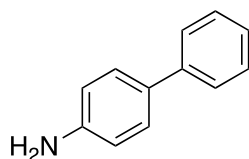

(Y 40%, reaction mixture)

<sup>1</sup>H NMR

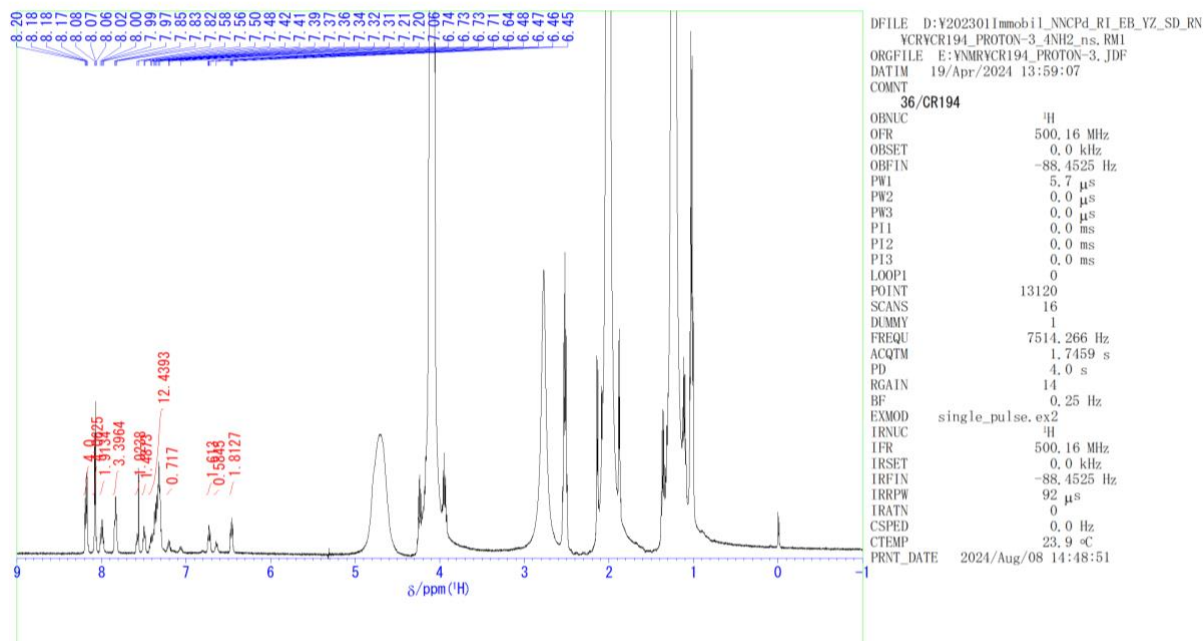

Enlarged, ■ : internal standard (pyrene), ● : the product, ● starting materials

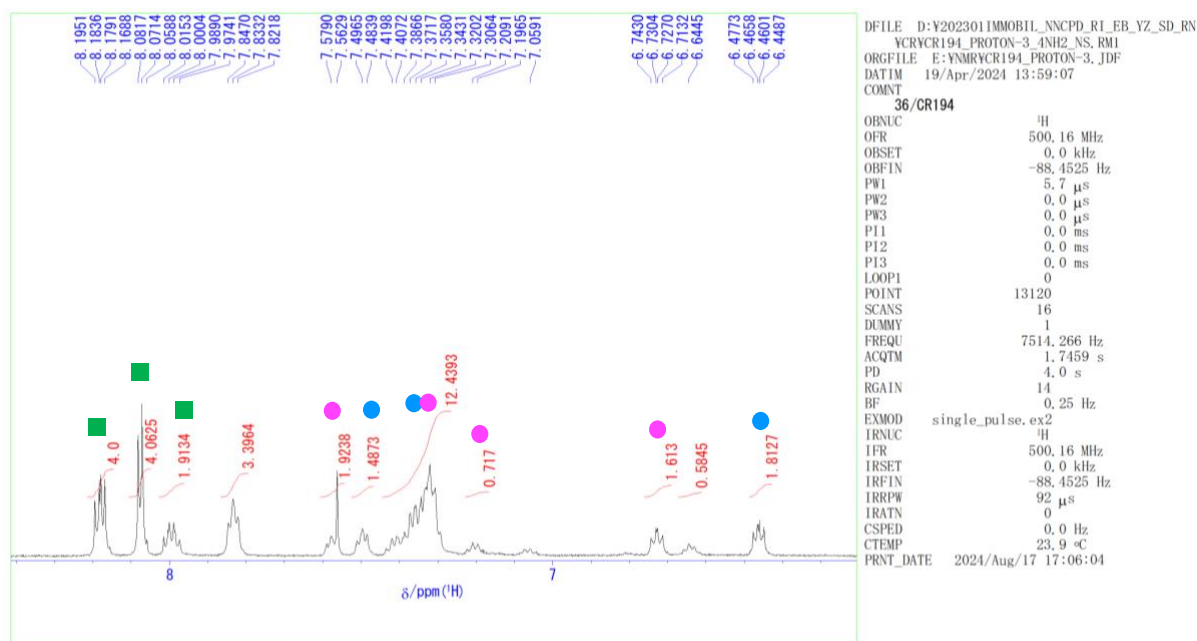



(4-trifluoromethyl)biphenyl (**10ga**)<sup>23</sup>

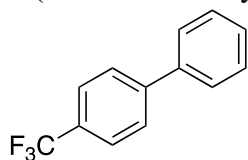

<sup>1</sup>H NMR (>99%, 78% isolated yield)

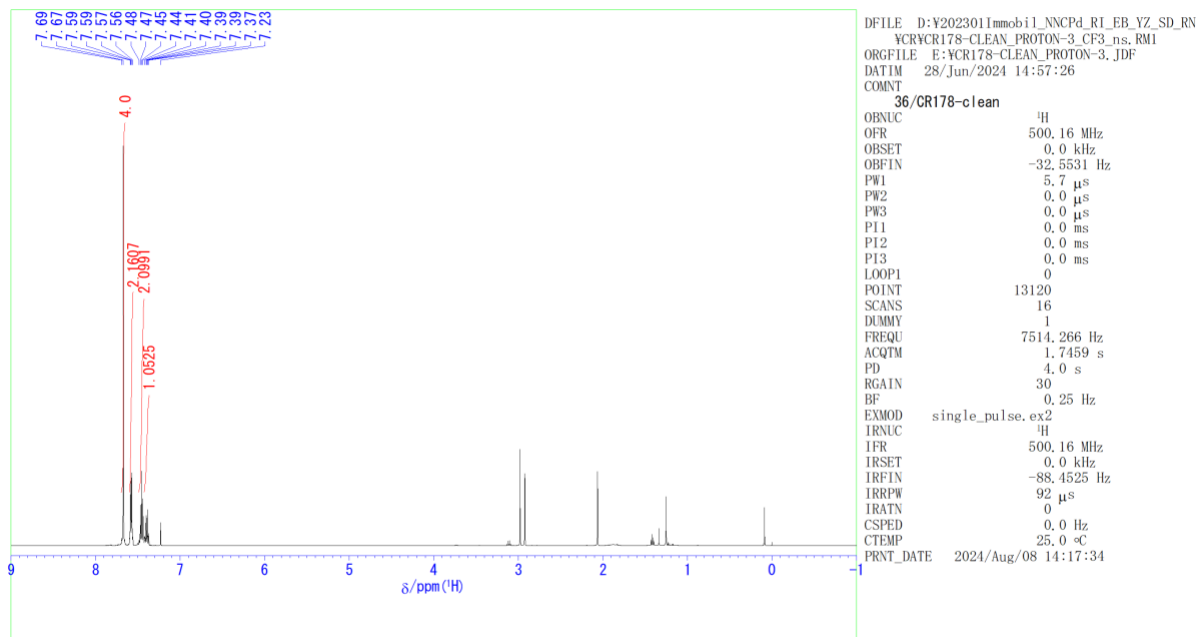

4-fluorobiphenyl (**10ha**)<sup>19</sup>

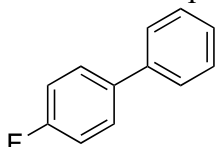

(Y >99%, reaction mixture)

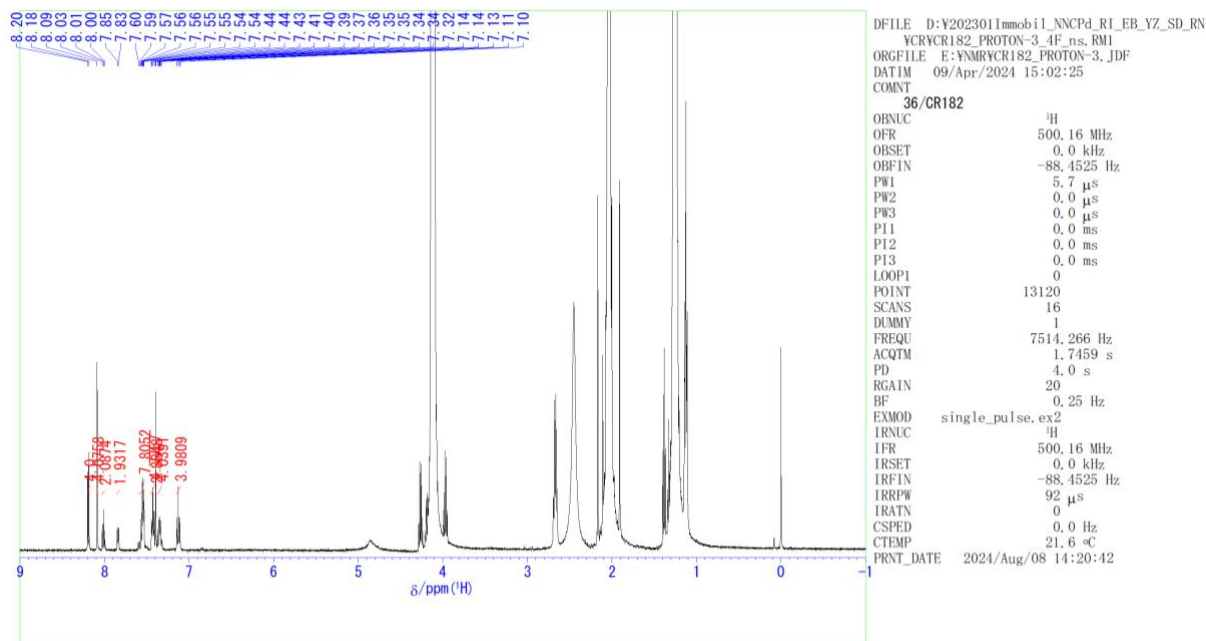

Enlarged, ■ : internal standard (pyrene), ● : the product

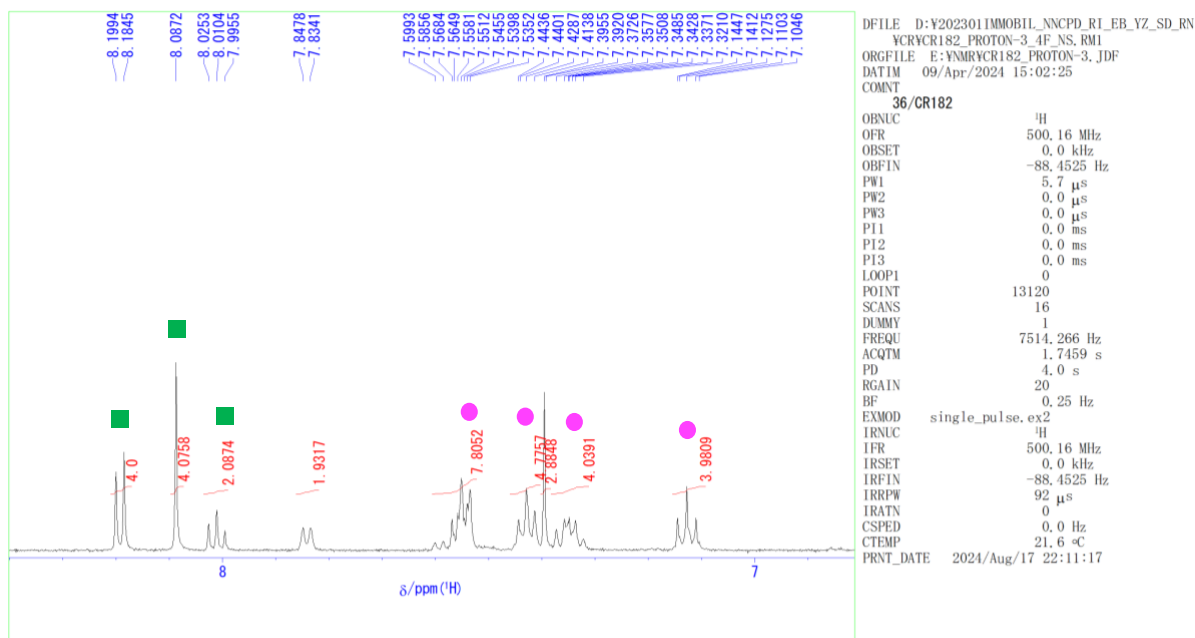

2-methylbiphenyl (**10ia**)<sup>19</sup>

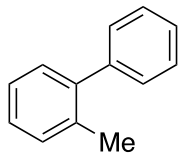

<sup>1</sup>H NMR

(Y 91%, reaction mixture)

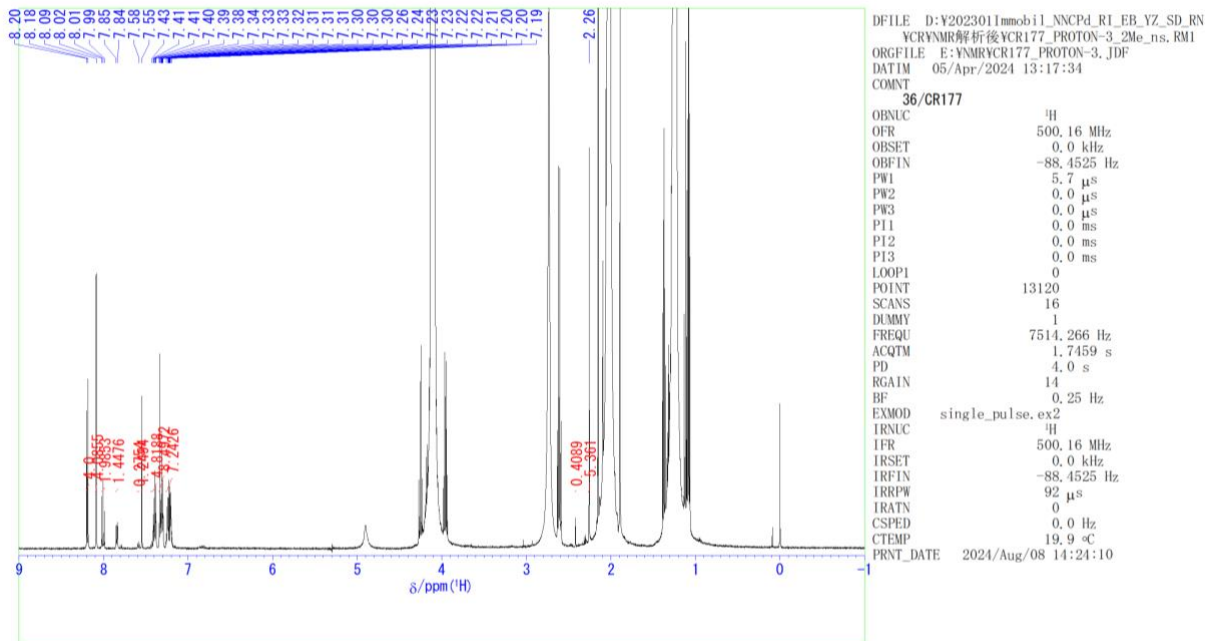

Enlarged, ■ : internal standard (pyrene), ● : the product

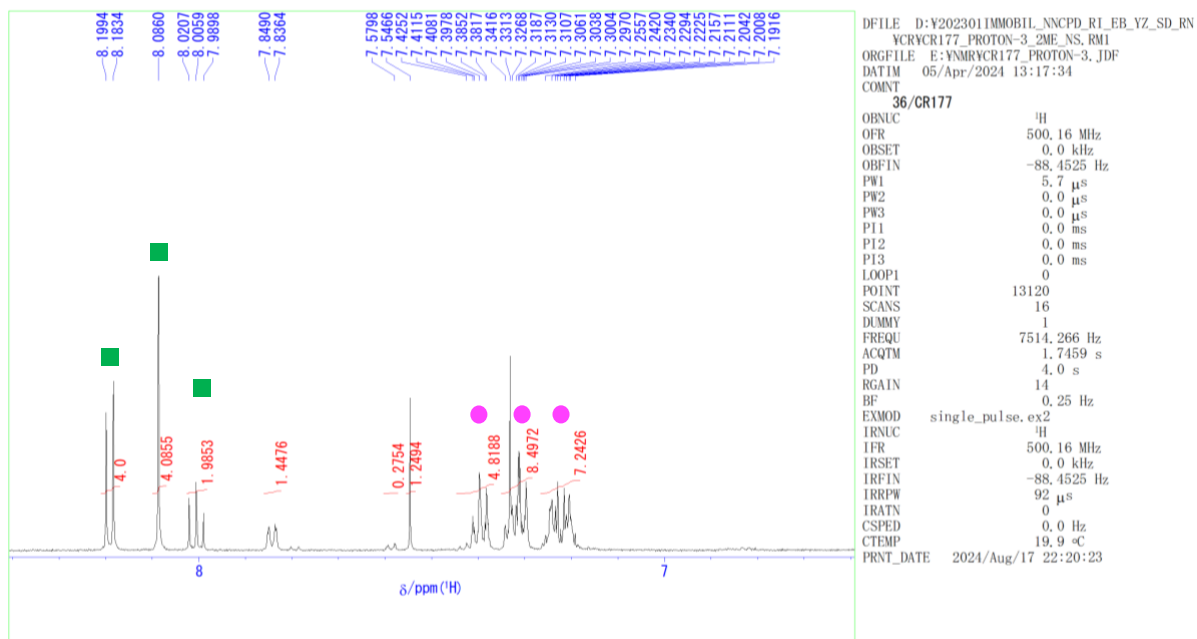

## 2-Methoxybiphenyl (10ja)<sup>21</sup>

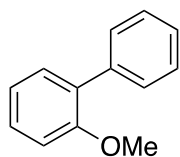

<sup>1</sup>H NMR

(Y 59%, reaction mixture)

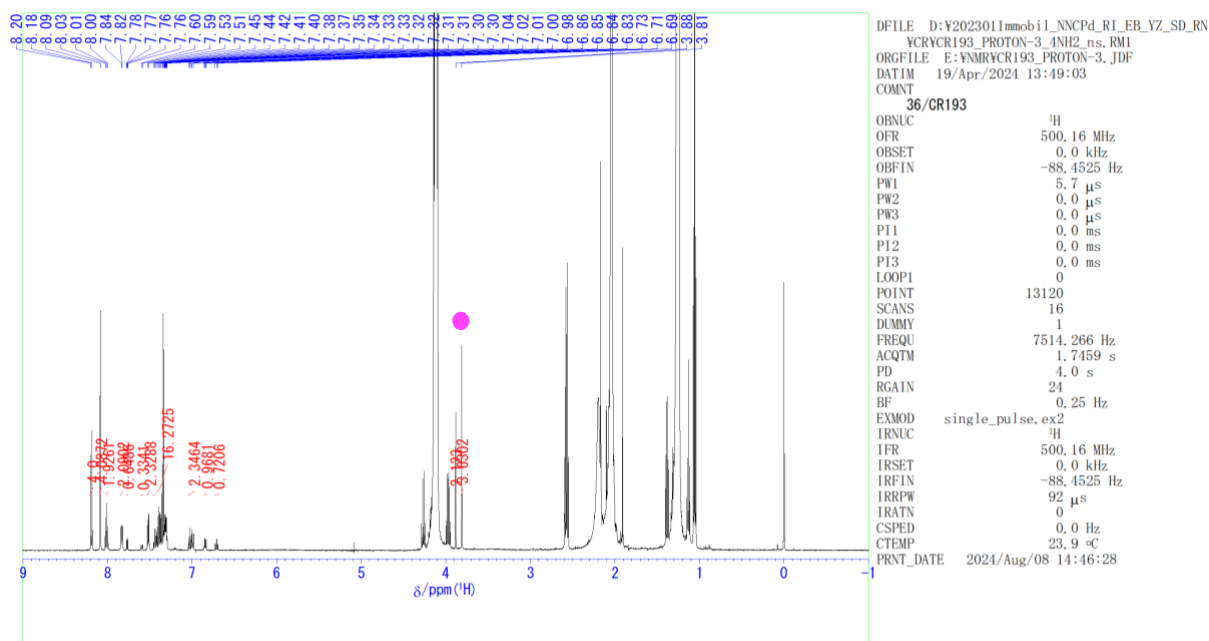

Enlarged, ■ : internal standard (pyrene), ● : the product

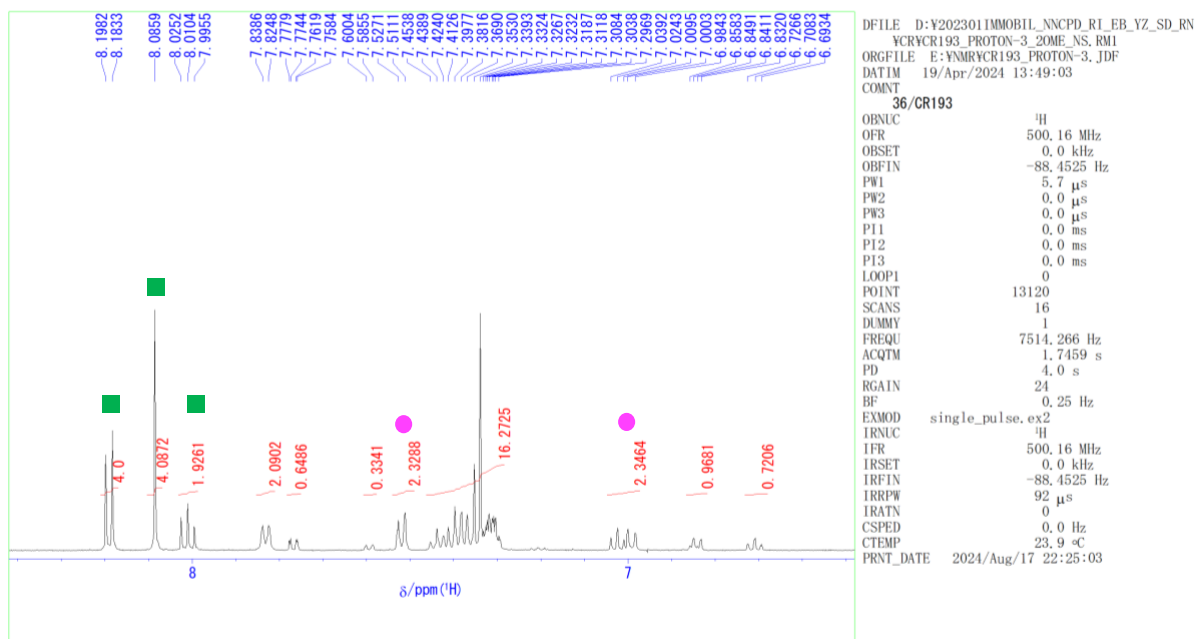

2-Phenylpyridine (**10ka**)<sup>18, 19</sup>

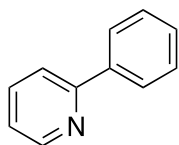

<sup>1</sup>H NMR

(Y 49%, reaction mixture)

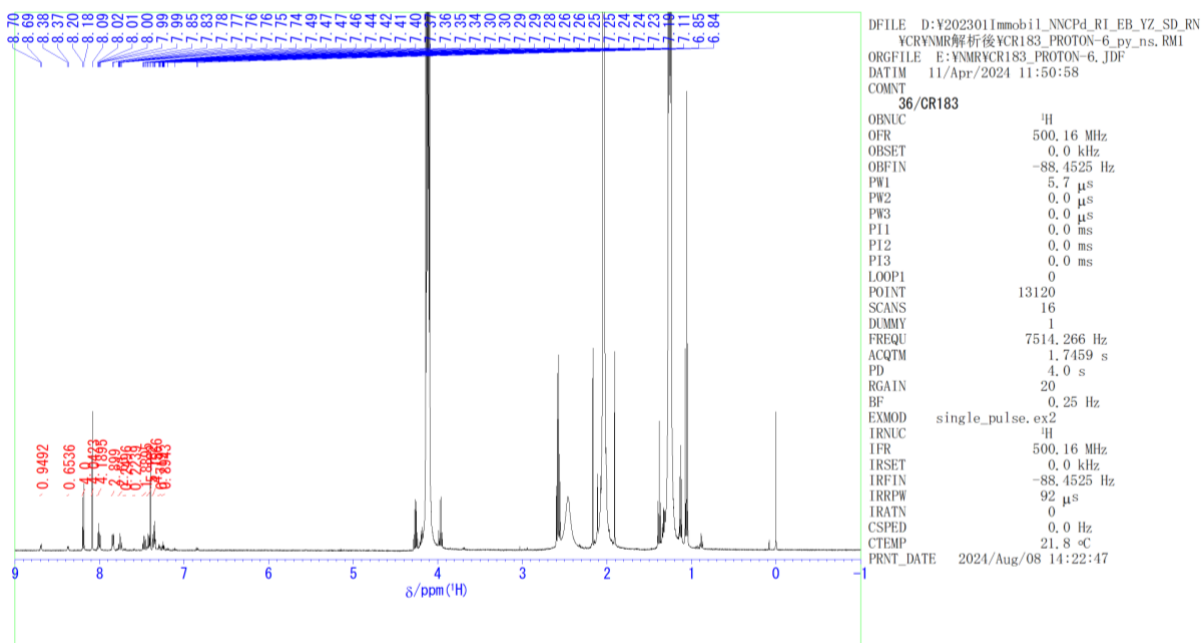

Enlarged, ■ : internal standard (pyrene), ● : the product, ● starting materials

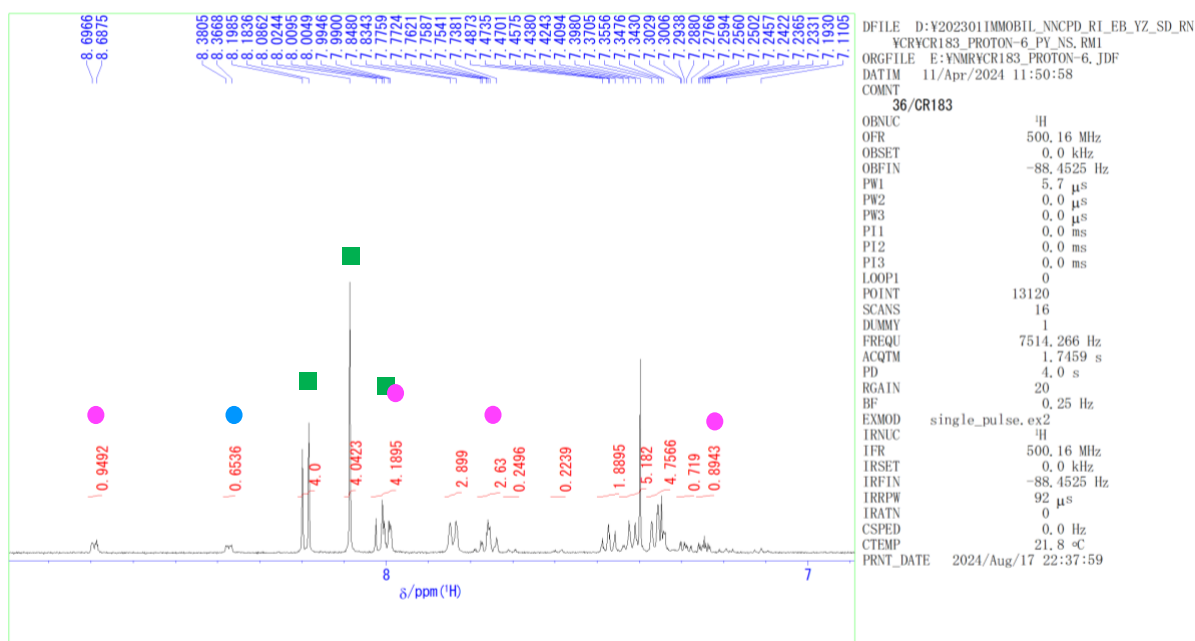

## 2-Phenylnaphthalene (**10la**)<sup>19</sup>

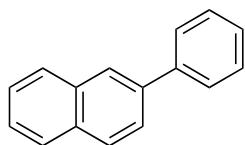

Isolated (crude 36%, containing solvents)

<sup>1</sup>H NMR

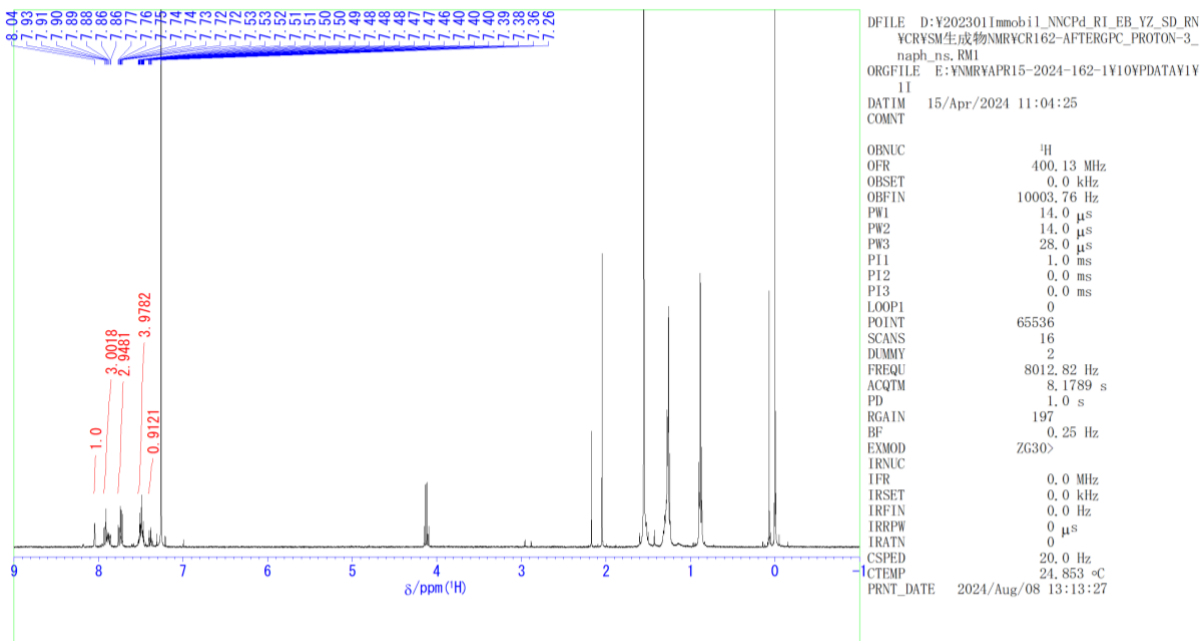

<sup>13</sup>C{<sup>1</sup>H} NMR

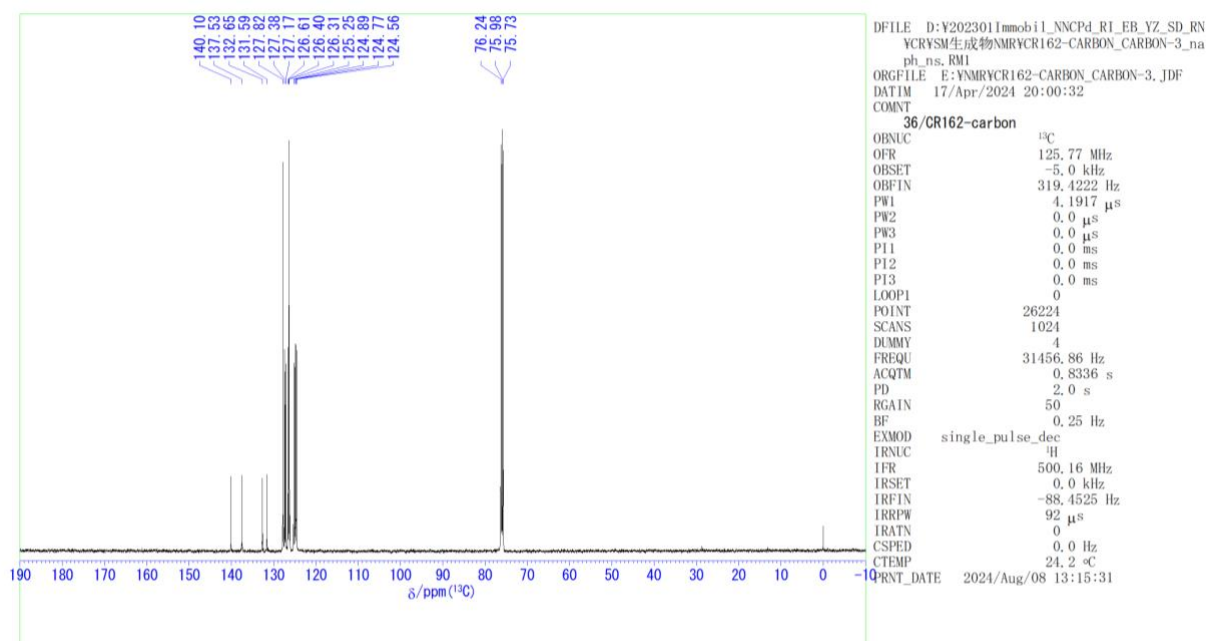

Ethyl 4-phenylbenzoate (**10ma**)<sup>21</sup>

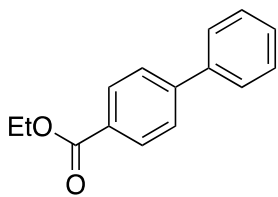

<sup>1</sup>H NMR (Y 64%, reaction mixture)

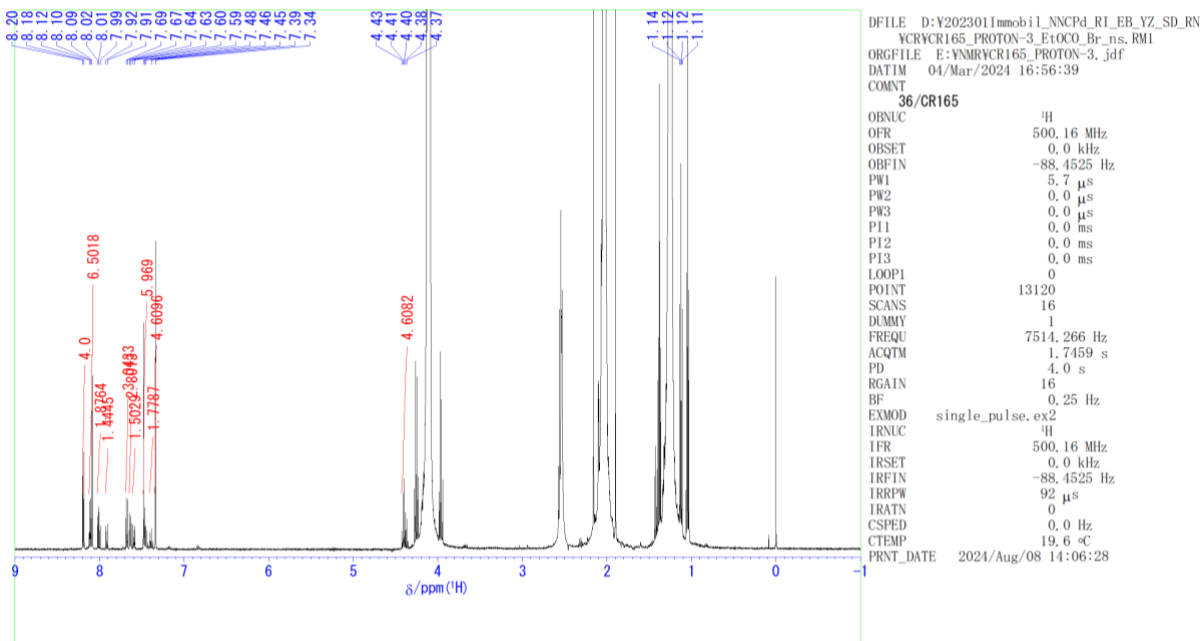

Enlarged ■ : internal standard (pyrene), ● : the product

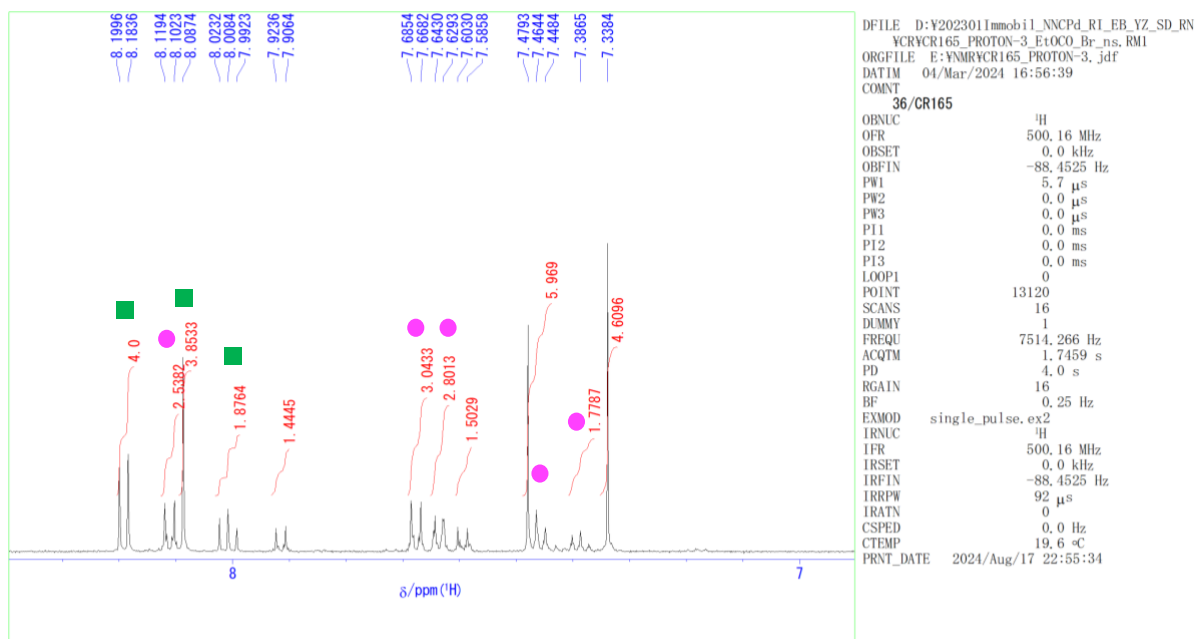

## 5. References

1. N. Suzuki, T. Takabe, Y. Yamauchi, S. Koyama, R. Koike, M. Rikukawa, W.-T. Liao, W.-S. Peng and F.-Y. Tsai, *Tetrahedron*, 2019, **75**, 1351-1358.
2. J. Li, H. Cong, L. Li and S. Zheng, *ACS Appl. Mater. Interf.*, 2014, **6**, 13677-13687.
3. A. L. Kjoniksen, K. Zhu, R. Pamies and B. Nystrom, *J. Phys. Chem.: B*, 2008, **112**, 3294-3299.
4. A.-L. Kjoniksen, K. Zhu, G. Karlsson and B. Nyström, *Colloids Surf. A: Physicochem. Eng. Asp.*, 2009, **333**, 32-45.
5. C. A. McFaul, A. M. Alb, M. F. Drenski and W. F. Reed, *Polymer*, 2011, **52**, 4825-4833.
6. M. A. Behrens, A.-L. Kjoniksen, K. Zhu, B. Nyström and J. S. Pedersen, *Macromolecules*, 2011, **45**, 246-255.
7. H. Takeoka, S. Wada, S.-i. Yusa, S. Sakurai, Y. Nakamura and S. Fujii, *J. Adhesion Soc. Jpn.*, 2015, **51**, 255-263.
8. M. Mizusaki, T. Endo, R. Nakahata, Y. Morishima and S.-i. Yusa, *Polymers*, 2017, **9**, 367-368.
9. X. Zhang, L. Chen, Z. Huang, N. Ling and Y. Xiao, *Chemistry*, 2021, **27**, 3688-3693.
10. J. Muller, F. Marchandeu, B. Prelot, J. Zajac, J.-J. Robin and S. Monge, *Polym. Chem.*, 2015, **6**, 3063-3073.
11. WO2005113612A1, 2004.
12. K. J. Kilpin, E. L. Gavey, C. J. McAdam, C. B. Anderson, S. J. Lind, C. C. Keep, K. C. Gordon and J. D. Crowley, *Inorg Chem*, 2011, **50**, 6334-6346.
13. S. Jakobsen and M. Tilst, *Tetrahedron Lett.*, 2011, **52**, 3072-3074.
14. *Japan Pat.*, 2014.
15. Y. Zheng, J. Zhang, X. Cheng, X. Xu and L. Zhang, *Angew. Chem. Int., Ed. Engl.*, 2019, **58**, 5241-5245.
16. D. Bai, T. Yan, S. Wang, Y. Wang, J. Fu, X. Fang, J. Zhu and J. Liu, *Angew. Chem. Int., Ed. Engl.*, 2020, **59**, 13602-13607.
17. N. Suzuki, S. Koyama, R. Koike, N. Ebara, R. Arai, Y. Takeoka, M. Rikukawa and F.-Y. Tsai, *Polymers*, 2021, **13**, 2717.
18. L. Sun, P. He, B. Xu, X. Xu and X. Wang, *RSC Advances*, 2013, **3**.
19. H.-T. Yang, S. Zhou, F.-S. Chang, C.-R. Chen and H.-M. Gau, *Organometallics*, 2009, **28**, 5715-5721.
20. W. C. Wang, K. F. Peng, M. T. Chen and C. T. Chen, *Dalton Trans.*, 2012, **41**, 3022-3029.
21. I. Hoffmann, B. Blumenröder, S. Onodi néé Thumann, S. Dommer and J. Schatz, *Green Chem.*, 2015, **17**, 3844-3857.
22. B. Karimi, F. Mansouri and H. Vali, *Green Chem.*, 2014, **16**.
23. N. Pirkl, A. Del Grosso, B. Mallick, A. Doppiu and L. J. Goossen, *Chem. Commun. (Camb)*, 2019, **55**, 5275-5278.
